# Supplementary material
Source: PubMed Central journal article supplement (PMC3601834)
Supplement: NIHMS447306-supplement-Supp_info.pdf [file NIHMS447306-supplement-Supp_info.pdf]

Supplementary Figure 1: Tissues dissected for RNA extraction. A picture of each tissue dissected for analysis is shown.

Supplementary microarray data: Lists of significantly DHT-regulated genes (using B stat) from our microarray studies in rat prostate, skin, forebrain, and ovary.
