# Supplementary material
Source: PubMed Central journal article supplement (PMC3601834)
Supplement: NIHMS447306-supplement-Supp_table.pdf [file NIHMS447306-supplement-Supp_table.pdf]

| Ovary              |            |                 |                  |       |       |         |         |       |
|--------------------|------------|-----------------|------------------|-------|-------|---------|---------|-------|
| Agilent feature ID | ShortName  | Ovary.DHT.ave A | Ovary.Ctrl.ave A | M     | Fold  | AdjP    | FDR     | B     |
| A_43_P12299        | Rab5a      | 7.973           | 6.342            | 1.631 | 3.098 | 0.16911 | 0.00819 | 4.058 |
| A_44_P305249       | AA818696   | 6.986           | 5.371            | 1.615 | 3.064 | 0.22714 | 0.00868 | 3.851 |
| A_44_P249936       | AI703858   | 7.271           | 5.901            | 1.371 | 2.586 | 0.29995 | 0.00883 | 3.787 |
| A_44_P388546       | Hmgcl      | 7.753           | 6.495            | 1.258 | 2.392 | 0.4743  | 0.01107 | 3.382 |
| A_44_P505440       | CB327764   | 7.293           | 6.106            | 1.187 | 2.277 | 0.59555 | 0.01193 | 3.201 |
| A_44_P394436       | Aytl2      | 7.475           | 6.152            | 1.323 | 2.502 | 0.74526 | 0.01319 | 2.981 |
| A_44_P181560       | LOC293494  | 9.033           | 6.649            | 2.384 | 5.221 | 0.93809 | 0.01519 | 2.845 |
| A_44_P489193       | AI233717   | 6.988           | 5.556            | 1.432 | 2.699 | 0.9403  | 0.01519 | 2.774 |
| A_44_P440439       | Accn2      | 7.601           | 6.572            | 1.029 | 2.041 | 1       | 0.01765 | 2.535 |
| A_44_P446136       | BI303233   | 7.321           | 6.118            | 1.203 | 2.302 | 1       | 0.01765 | 2.519 |
| A_43_P20266        | RGD1562456 | 7.038           | 5.914            | 1.124 | 2.179 | 1       | 0.01991 | 2.338 |
| A_44_P963812       | Ctnnal1    | 8.148           | 7.06             | 1.088 | 2.126 | 1       | 0.02173 | 2.237 |
| A_44_P186789       | BU758374   | 7.086           | 5.971            | 1.115 | 2.166 | 1       | 0.02663 | 1.968 |
| A_44_P174881       | AI577346   | 6.355           | 5.121            | 1.234 | 2.353 | 1       | 0.02808 | 1.898 |
| A_44_P437431       | RGD1311098 | 6.913           | 5.637            | 1.277 | 2.423 | 1       | 0.02836 | 1.798 |
| A_44_P1039205      | M23721     | 11.583          | 10.781           | 0.801 | 1.743 | 1       | 0.03599 | 1.418 |
| A_44_P623686       | TC526530   | 9.193           | 7.887            | 1.306 | 2.472 | 1       | 0.03601 | 1.41  |
| A_44_P374491       | Mapk6      | 6.82            | 5.665            | 1.155 | 2.227 | 1       | 0.03601 | 1.406 |

|              |              |        |       |       |       |   |             |       |
|--------------|--------------|--------|-------|-------|-------|---|-------------|-------|
| A_44_P411318 | CA507164     | 6.439  | 5.297 | 1.142 | 2.207 | 1 | 0.0361<br>3 | 1.383 |
| A_44_P118598 | BG670310     | 6.042  | 5.2   | 0.842 | 1.792 | 1 | 0.0361<br>3 | 1.379 |
| A_42_P570693 | AW918118     | 6.886  | 5.515 | 1.371 | 2.586 | 1 | 0.0361<br>3 | 1.347 |
| A_44_P497467 | CB546500     | 6.093  | 5.149 | 0.944 | 1.924 | 1 | 0.0365<br>2 | 1.343 |
| A_44_P115913 | Ugp2         | 7.355  | 6.228 | 1.127 | 2.184 | 1 | 0.0361<br>3 | 1.327 |
| A_44_P597431 | Rcn1         | 11.184 | 9.988 | 1.196 | 2.292 | 1 | 0.0361<br>3 | 1.32  |
| A_44_P946117 | TC559472     | 7.246  | 6.146 | 1.1   | 2.144 | 1 | 0.0408<br>2 | 1.117 |
| A_44_P341197 | Baz1b        | 6.388  | 5.306 | 1.082 | 2.117 | 1 | 0.0442<br>1 | 1.032 |
| A_44_P172251 | BG375698     | 7.061  | 6.089 | 0.972 | 1.961 | 1 | 0.0481<br>1 | 0.891 |
| A_44_P476024 | LOC362652    | 6.457  | 5.554 | 0.902 | 1.869 | 1 | 0.0486      | 0.859 |
| A_44_P535082 | AI176420     | 6.999  | 5.82  | 1.179 | 2.265 | 1 | 0.0530<br>8 | 0.724 |
| A_44_P667951 | A_44_P667951 | 5.951  | 5.032 | 0.919 | 1.891 | 1 | 0.0532<br>1 | 0.687 |
| A_44_P372839 | Cenpe        | 8.149  | 6.735 | 1.414 | 2.665 | 1 | 0.0537<br>3 | 0.664 |
| A_44_P292380 | Copb1        | 6.823  | 5.683 | 1.141 | 2.205 | 1 | 0.0537<br>3 | 0.659 |
| A_44_P750589 | TC550128     | 7.417  | 6.517 | 0.9   | 1.867 | 1 | 0.0559<br>7 | 0.556 |
| A_44_P743248 | AA874825     | 7.12   | 5.944 | 1.176 | 2.26  | 1 | 0.0559<br>7 | 0.547 |
| A_44_P524299 | Dut          | 6.544  | 5.524 | 1.02  | 2.028 | 1 | 0.0563<br>2 | 0.528 |
| A_44_P304009 | RGD1560913   | 8.107  | 6.752 | 1.354 | 2.557 | 1 | 0.0572<br>5 | 0.497 |
| A_44_P951467 | A_44_P951467 | 6.431  | 5.522 | 0.909 | 1.878 | 1 | 0.0574<br>9 | 0.445 |
| A_44_P378536 | DV727383     | 6.098  | 5.035 | 1.063 | 2.089 | 1 | 0.0584<br>4 | 0.413 |

|                   |              |        |       |        |       |              |              |        |
|-------------------|--------------|--------|-------|--------|-------|--------------|--------------|--------|
| A_44_P441833      | AI009003     | 9.59   | 8.846 | 0.744  | 1.675 | 1            | 0.0595<br>1  | 0.333  |
| A_44_P509070      | XM_343344    | 6.309  | 5.365 | 0.944  | 1.924 | 1            | 0.0595<br>1  | 0.328  |
| A_44_P240597      | CB783877     | 7.716  | 6.605 | 1.111  | 2.16  | 1            | 0.0595<br>1  | 0.317  |
| A_44_P307971      | L04739       | 8.147  | 6.829 | 1.318  | 2.493 | 1            | 0.0636<br>5  | 0.211  |
| A_44_P111457      | RGD1308706   | 5.743  | 4.989 | 0.754  | 1.686 | 1            | 0.0636<br>5  | 0.189  |
| A_44_P194821      | RGD1562949   | 7.309  | 6.25  | 1.059  | 2.084 | 1            | 0.0636<br>5  | 0.182  |
| A_43_P20530       | Steap2       | 7.586  | 6.377 | 1.209  | 2.312 | 1            | 0.0636<br>5  | 0.175  |
| A_44_P444539      | LOC687555    | 7.193  | 6.168 | 1.024  | 2.034 | 1            | 0.0636<br>5  | 0.151  |
| A_44_P194606      | LOC678807    | 6.419  | 5.625 | 0.794  | 1.734 | 1            | 0.0641<br>6  | 0.132  |
| A_44_P901138      | TC528328     | 6.396  | 5.42  | 0.976  | 1.968 | 1            | 0.0651<br>4  | 0.101  |
| A_44_P962936      | Cdca4        | 7.175  | 5.835 | 1.34   | 2.531 | 1            | 0.0675<br>2  | 0.036  |
| A_44_P236886      | XM_340919    | 7.69   | 6.679 | 1.011  | 2.015 | 1            | 0.0666<br>4  | 0.035  |
| A_44_P101818<br>1 | Mmaa         | 10.448 | 9.66  | 0.788  | 1.727 | 1            | 0.0675<br>2  | 0.025  |
| A_44_P148119      | BQ200023     | 6.771  | 9.483 | -2.712 | 0.153 | 4.00E-<br>05 | 4.00E-<br>05 | 11.135 |
| A_44_P613180      | A_44_P613180 | 5.879  | 8.99  | -3.111 | 0.116 | 0.0035<br>6  | 0.0010<br>9  | 7.543  |
| A_44_P272631      | AA818792     | 5.05   | 7.479 | -2.429 | 0.186 | 0.0042<br>5  | 0.0010<br>9  | 7.29   |
| A_44_P154392      | XM_347024    | 5.643  | 7.802 | -2.158 | 0.224 | 0.0054       | 0.0010<br>9  | 7.204  |
| A_44_P316700      | RGD1559982   | 5.419  | 8.395 | -2.976 | 0.127 | 0.0065<br>4  | 0.0010<br>9  | 7.047  |
| A_44_P120425      | AI230862     | 7.859  | 9.779 | -1.92  | 0.264 | 0.0055<br>8  | 0.0010<br>9  | 7.032  |
| A_43_P15545       | Tcam1        | 5.629  | 8.29  | -2.661 | 0.158 | 0.0078<br>9  | 0.0011<br>3  | 6.914  |

|              |                    |       |       |        |       |         |         |       |
|--------------|--------------------|-------|-------|--------|-------|---------|---------|-------|
| A_44_P156136 | AA817829           | 6.23  | 8.214 | -1.984 | 0.253 | 0.01267 | 0.00158 | 6.518 |
| A_42_P659432 | BF558775           | 6.199 | 7.957 | -1.758 | 0.296 | 0.01776 | 0.00172 | 6.219 |
| A_44_P124982 | Usp54              | 6.231 | 8.033 | -1.801 | 0.287 | 0.01987 | 0.00172 | 6.125 |
| A_44_P372752 | ENSRNOT00000020175 | 5.168 | 6.935 | -1.766 | 0.294 | 0.02237 | 0.00172 | 6.119 |
| A_44_P320906 | M23885             | 5.312 | 6.933 | -1.621 | 0.325 | 0.02175 | 0.00172 | 6.062 |
| A_44_P370052 | Ldhc               | 6.742 | 9.558 | -2.816 | 0.142 | 0.01536 | 0.00171 | 5.67  |
| A_44_P234531 | RGD1308613         | 5.582 | 8.296 | -2.713 | 0.152 | 0.04075 | 0.00291 | 5.525 |
| A_43_P17325  | RGD1305208         | 6.802 | 8.539 | -1.737 | 0.3   | 0.09699 | 0.00647 | 4.776 |
| A_43_P19554  | Zc3h5              | 7.679 | 9.243 | -1.564 | 0.338 | 0.10495 | 0.00656 | 4.707 |
| A_44_P139182 | Cit                | 6.468 | 8.132 | -1.664 | 0.316 | 0.11498 | 0.00677 | 4.629 |
| A_43_P13131  | Fgf15              | 5.347 | 7.116 | -1.769 | 0.293 | 0.14669 | 0.00779 | 4.418 |
| A_44_P473475 | LOC298346          | 4.931 | 6.443 | -1.512 | 0.351 | 0.18917 | 0.00819 | 4.193 |
| A_44_P166261 | A_44_P166261       | 5.072 | 7.33  | -2.258 | 0.209 | 0.18001 | 0.00819 | 4.182 |
| A_44_P117254 | LOC680844          | 5.208 | 7.621 | -2.413 | 0.188 | 0.19627 | 0.00819 | 4.16  |
| A_44_P114577 | Acox1              | 5.04  | 6.568 | -1.528 | 0.347 | 0.19655 | 0.00819 | 4.159 |
| A_44_P285498 | Camk2n2            | 5.755 | 7.621 | -1.866 | 0.274 | 0.14789 | 0.00779 | 4.123 |
| A_43_P18691  | RGD1311162         | 7.072 | 8.499 | -1.426 | 0.372 | 0.22052 | 0.00868 | 4.095 |
| A_43_P16026  | XM_223121          | 5.151 | 6.439 | -1.289 | 0.409 | 0.23892 | 0.00868 | 4.023 |
| A_44_P417229 | RGD1559742         | 4.934 | 6.233 | -1.299 | 0.406 | 0.25305 | 0.00868 | 3.972 |
| A_42_P464055 | Olig2              | 5.895 | 7.192 | -1.297 | 0.407 | 0.27417 | 0.00868 | 3.9   |

|              |                        |       |       |        |       |             |             |       |
|--------------|------------------------|-------|-------|--------|-------|-------------|-------------|-------|
| A_44_P729113 | RGD1560971             | 5.437 | 7.122 | -1.686 | 0.311 | 0.2755<br>2 | 0.0086<br>8 | 3.895 |
| A_44_P493005 | Foxq1                  | 7.08  | 8.423 | -1.343 | 0.394 | 0.2759      | 0.0086<br>8 | 3.894 |
| A_44_P390223 | Apoc2                  | 5.066 | 6.474 | -1.409 | 0.377 | 0.2774<br>7 | 0.0086<br>8 | 3.889 |
| A_44_P109957 | ENSRNOT000000467<br>58 | 5.249 | 6.381 | -1.132 | 0.456 | 0.2953      | 0.0088<br>3 | 3.801 |
| A_44_P448041 | Abcb11                 | 5.284 | 6.69  | -1.406 | 0.377 | 0.3356<br>7 | 0.0096      | 3.688 |
| A_43_P11028  | BE117715               | 5.398 | 6.603 | -1.205 | 0.434 | 0.3600<br>9 | 0.0097<br>7 | 3.666 |
| A_44_P304684 | RGD1565379             | 5.041 | 6.333 | -1.292 | 0.408 | 0.3610<br>2 | 0.0097<br>7 | 3.663 |
| A_44_P265257 | XM_345571              | 5.381 | 6.66  | -1.278 | 0.412 | 0.3810<br>5 | 0.0100<br>4 | 3.576 |
| A_44_P791139 | A_44_P791139           | 5.29  | 6.934 | -1.644 | 0.32  | 0.4812<br>4 | 0.0110<br>7 | 3.37  |
| A_44_P274866 | AA924468               | 4.972 | 6.294 | -1.322 | 0.4   | 0.4890<br>1 | 0.0110<br>7 | 3.364 |
| A_44_P320818 | Mug1                   | 5.499 | 7.188 | -1.69  | 0.31  | 0.5007<br>7 | 0.0110<br>7 | 3.334 |
| A_43_P15654  | Hcn2                   | 6.222 | 8.059 | -1.837 | 0.28  | 0.5021<br>1 | 0.0110<br>7 | 3.332 |
| A_44_P124134 | LOC681488              | 5.085 | 7.69  | -2.605 | 0.164 | 0.5084<br>7 | 0.0110<br>7 | 3.33  |
| A_44_P426948 | RGD1563255             | 5.255 | 8.227 | -2.973 | 0.127 | 0.4977<br>5 | 0.0110<br>7 | 3.314 |
| A_43_P17969  | Nrcam                  | 5.662 | 7.898 | -2.236 | 0.212 | 0.5728<br>7 | 0.0119<br>3 | 3.236 |
| A_44_P555518 | RGD1563458             | 4.894 | 6.076 | -1.182 | 0.441 | 0.5882<br>3 | 0.0119<br>3 | 3.212 |
| A_44_P299897 | A_44_P299897           | 5.276 | 6.858 | -1.582 | 0.334 | 0.5959      | 0.0119<br>3 | 3.19  |
| A_43_P21764  | RGD1308319             | 5.952 | 7.415 | -1.463 | 0.363 | 0.6219<br>4 | 0.0122<br>1 | 3.152 |
| A_44_P571699 | AI227836               | 7.138 | 8.583 | -1.446 | 0.367 | 0.6635<br>7 | 0.0127      | 3.084 |
| A_44_P181115 | AA925467               | 5.794 | 7.564 | -1.77  | 0.293 | 0.6776<br>8 | 0.0127      | 3.036 |

|              |                        |        |        |        |       |             |             |       |
|--------------|------------------------|--------|--------|--------|-------|-------------|-------------|-------|
| A_44_P957585 | Gnao                   | 5.247  | 6.215  | -0.968 | 0.511 | 0.7331<br>1 | 0.0131<br>9 | 3.013 |
| A_44_P167909 | Ffar1                  | 5.229  | 7.013  | -1.785 | 0.29  | 0.7508<br>9 | 0.0131<br>9 | 2.974 |
| A_44_P154498 | RGD1559747             | 5.792  | 7.301  | -1.51  | 0.351 | 0.7839<br>4 | 0.0135<br>3 | 2.947 |
| A_44_P318674 | Slc22a7                | 5.836  | 8.798  | -2.962 | 0.128 | 0.6848<br>5 | 0.0127      | 2.933 |
| A_44_P219668 | Acat1                  | 11.897 | 13.853 | -1.956 | 0.258 | 0.5021<br>1 | 0.0110<br>7 | 2.92  |
| A_44_P225109 | ENSRNOT000000139<br>42 | 5.096  | 6.271  | -1.175 | 0.443 | 0.8002<br>7 | 0.0135<br>8 | 2.917 |
| A_44_P800492 | A_44_P800492           | 5.615  | 6.602  | -0.987 | 0.505 | 0.8659<br>3 | 0.0144<br>5 | 2.863 |
| A_44_P472874 | Trpa1                  | 5.078  | 6.355  | -1.277 | 0.413 | 0.9882<br>6 | 0.0155<br>2 | 2.756 |
| A_43_P17055  | LOC690853              | 6.107  | 7.411  | -1.304 | 0.405 | 1           | 0.0155<br>2 | 2.724 |
| A_44_P345101 | Bai3                   | 5.278  | 6.565  | -1.287 | 0.41  | 1           | 0.0155<br>2 | 2.715 |
| A_44_P117310 | A_44_P117310           | 5.074  | 6.222  | -1.148 | 0.451 | 1           | 0.0157<br>5 | 2.668 |
| A_44_P145334 | BI302561               | 5.627  | 7.107  | -1.48  | 0.358 | 1           | 0.0157<br>5 | 2.646 |
| A_44_P837538 | M23953                 | 11.046 | 13.21  | -2.164 | 0.223 | 1           | 0.0157<br>5 | 2.646 |
| A_44_P728793 | RGD1566185             | 5.906  | 8.399  | -2.493 | 0.178 | 1           | 0.0157<br>5 | 2.478 |
| A_42_P593020 | Rln1                   | 12.975 | 15.686 | -2.71  | 0.153 | 1           | 0.0180<br>9 | 2.475 |
| A_44_P260401 | A_44_P260401           | 5.373  | 6.766  | -1.392 | 0.381 | 1           | 0.0187<br>9 | 2.447 |
| A_44_P297999 | AA955481               | 5.05   | 5.924  | -0.874 | 0.546 | 1           | 0.0191<br>7 | 2.416 |
| A_44_P532284 | RGD1563086             | 5.95   | 7.713  | -1.762 | 0.295 | 1           | 0.0193<br>1 | 2.38  |
| A_44_P744163 | RGD1562532             | 5.211  | 6.577  | -1.366 | 0.388 | 1           | 0.0210<br>1 | 2.278 |
| A_43_P18526  | Atp11c                 | 6.708  | 8.912  | -2.204 | 0.217 | 1           | 0.0193<br>1 | 2.249 |

|              |              |       |       |        |       |   |         |       |
|--------------|--------------|-------|-------|--------|-------|---|---------|-------|
| A_44_P456197 | Crhr1        | 6.402 | 8.158 | -1.756 | 0.296 | 1 | 0.022   | 2.209 |
| A_43_P20098  | Dock2        | 5.986 | 8.16  | -2.173 | 0.222 | 1 | 0.02218 | 2.185 |
| A_44_P373317 | Al555341     | 5.926 | 7.657 | -1.73  | 0.301 | 1 | 0.02173 | 2.106 |
| A_43_P23475  | X94514       | 6.21  | 7.449 | -1.239 | 0.424 | 1 | 0.02441 | 2.088 |
| A_44_P942390 | Al175054     | 5.616 | 6.844 | -1.227 | 0.427 | 1 | 0.02624 | 2.01  |
| A_44_P117033 | A_44_P117033 | 5.089 | 6.226 | -1.137 | 0.455 | 1 | 0.02624 | 2.009 |
| A_44_P309782 | Josd1        | 6.191 | 7.387 | -1.197 | 0.436 | 1 | 0.02624 | 2.001 |
| A_44_P426792 | RT1-M6-2     | 5.718 | 7.206 | -1.488 | 0.357 | 1 | 0.0271  | 1.956 |
| A_44_P332879 | Abpa         | 5.068 | 6.386 | -1.318 | 0.401 | 1 | 0.02808 | 1.877 |
| A_44_P286035 | LOC365476    | 5.833 | 7.274 | -1.441 | 0.368 | 1 | 0.02808 | 1.865 |
| A_44_P314056 | RGD1563197   | 5.079 | 6.318 | -1.239 | 0.424 | 1 | 0.02808 | 1.859 |
| A_44_P349273 | F13b         | 5.024 | 6.388 | -1.365 | 0.388 | 1 | 0.02808 | 1.859 |
| A_44_P110470 | AA926323     | 5.204 | 6.679 | -1.476 | 0.36  | 1 | 0.02808 | 1.851 |
| A_44_P535725 | Al072460     | 5.17  | 6.426 | -1.256 | 0.419 | 1 | 0.02836 | 1.815 |
| A_44_P209280 | Aim1l        | 5.51  | 6.908 | -1.398 | 0.379 | 1 | 0.02836 | 1.812 |
| A_44_P194572 | LOC502175    | 5.267 | 6.742 | -1.475 | 0.36  | 1 | 0.02836 | 1.795 |
| A_44_P140532 | XM_345678    | 8.243 | 9.407 | -1.164 | 0.446 | 1 | 0.02836 | 1.764 |
| A_44_P400850 | A_44_P400850 | 5.356 | 7.262 | -1.906 | 0.267 | 1 | 0.02941 | 1.753 |
| A_44_P466335 | A_44_P466335 | 5.447 | 6.395 | -0.948 | 0.518 | 1 | 0.03007 | 1.719 |
| A_44_P621757 | LOC689725    | 5.191 | 6.014 | -0.822 | 0.565 | 1 | 0.03007 | 1.714 |
| A_44_P431465 | Sema3e       | 5.694 | 7.435 | -1.742 | 0.299 | 1 | 0.0300  | 1.702 |

|              |                    |       |       |        |       |   |         |       |
|--------------|--------------------|-------|-------|--------|-------|---|---------|-------|
|              |                    |       |       |        |       |   | 7       |       |
| A_44_P133393 | XM_233316          | 5.041 | 6.772 | -1.73  | 0.301 | 1 | 0.03007 | 1.697 |
| A_44_P382219 | XM_344567          | 6.509 | 7.919 | -1.41  | 0.376 | 1 | 0.03073 | 1.676 |
| A_44_P662685 | LOC500102          | 5.586 | 7.212 | -1.626 | 0.324 | 1 | 0.03073 | 1.661 |
| A_44_P365676 | A_44_P365676       | 5.208 | 7.318 | -2.111 | 0.231 | 1 | 0.03263 | 1.596 |
| A_44_P527205 | RGD1565230         | 5.654 | 7.301 | -1.647 | 0.319 | 1 | 0.03328 | 1.561 |
| A_44_P501608 | ENSRNOT00000042234 | 5.154 | 6.177 | -1.023 | 0.492 | 1 | 0.03328 | 1.559 |
| A_44_P527840 | RGD1306603         | 5.888 | 7.702 | -1.814 | 0.284 | 1 | 0.03328 | 1.554 |
| A_44_P194718 | A_44_P194718       | 5.184 | 6.395 | -1.212 | 0.432 | 1 | 0.03328 | 1.548 |
| A_44_P337647 | XM_226613          | 5.018 | 6.74  | -1.722 | 0.303 | 1 | 0.0333  | 1.536 |
| A_44_P105327 | RGD1561546         | 5.67  | 7.189 | -1.519 | 0.349 | 1 | 0.03407 | 1.534 |
| A_44_P322987 | Crybb1             | 6.774 | 7.87  | -1.096 | 0.468 | 1 | 0.03332 | 1.524 |
| A_44_P206505 | Pdzrn4             | 6.57  | 7.783 | -1.213 | 0.431 | 1 | 0.03332 | 1.519 |
| A_44_P523062 | Atoh7              | 6.636 | 8.576 | -1.94  | 0.261 | 1 | 0.03407 | 1.504 |
| A_44_P177490 | AF380201           | 5.079 | 6.67  | -1.591 | 0.332 | 1 | 0.0341  | 1.475 |
| A_44_P725497 | AI704799           | 5.564 | 6.861 | -1.297 | 0.407 | 1 | 0.03601 | 1.387 |
| A_44_P377136 | PRP-2              | 5.595 | 7.101 | -1.506 | 0.352 | 1 | 0.03601 | 1.386 |
| A_44_P549083 | Stx6               | 5.842 | 6.767 | -0.925 | 0.527 | 1 | 0.03613 | 1.362 |
| A_44_P298465 | Gcg                | 5.175 | 6.606 | -1.431 | 0.371 | 1 | 0.03613 | 1.334 |
| A_44_P243102 | Gad1               | 5.308 | 6.346 | -1.038 | 0.487 | 1 | 0.03613 | 1.33  |
| A_44_P432035 | AW531000           | 5.58  | 7.769 | -2.189 | 0.219 | 1 | 0.03613 | 1.328 |



|                   |                        |        |        |        |       |   |             |       |
|-------------------|------------------------|--------|--------|--------|-------|---|-------------|-------|
| A_43_P20478       | Slc37a1                | 6.919  | 7.995  | -1.077 | 0.474 | 1 | 0.0361<br>3 | 1.312 |
| A_44_P135482      | A_44_P135482           | 6.319  | 7.805  | -1.486 | 0.357 | 1 | 0.0361<br>3 | 1.285 |
| A_44_P161470      | Defa6                  | 5.118  | 6.686  | -1.568 | 0.337 | 1 | 0.0368<br>2 | 1.274 |
| A_44_P306344      | F2rl2                  | 6.243  | 7.944  | -1.701 | 0.307 | 1 | 0.0369<br>7 | 1.263 |
| A_44_P499482      | LOC686933              | 5.346  | 6.486  | -1.139 | 0.454 | 1 | 0.0375<br>9 | 1.241 |
| A_44_P109700      | A_44_P109700           | 5.621  | 6.911  | -1.29  | 0.409 | 1 | 0.0384<br>7 | 1.229 |
| A_44_P555921      | ENSRNOT000000035<br>11 | 5.347  | 6.529  | -1.182 | 0.441 | 1 | 0.0395<br>4 | 1.19  |
| A_44_P359238      | BG372380               | 5.268  | 6.18   | -0.912 | 0.532 | 1 | 0.0398<br>3 | 1.183 |
| A_44_P732028      | TC563787               | 5.049  | 5.998  | -0.949 | 0.518 | 1 | 0.0396<br>3 | 1.167 |
| A_44_P533343      | BM386267               | 5.963  | 7.233  | -1.269 | 0.415 | 1 | 0.0396<br>9 | 1.159 |
| A_44_P366913      | AI029675               | 5.213  | 6.256  | -1.043 | 0.485 | 1 | 0.0398<br>3 | 1.147 |
| A_44_P101720<br>6 | RGD1307753             | 14.421 | 15.966 | -1.545 | 0.343 | 1 | 0.0396<br>3 | 1.129 |
| A_44_P438798      | XM_345957              | 5.168  | 6.891  | -1.723 | 0.303 | 1 | 0.0408<br>2 | 1.112 |
| A_44_P560485      | RGD1560110             | 5.421  | 6.529  | -1.108 | 0.464 | 1 | 0.0414<br>6 | 1.09  |
| A_44_P178460      | ltk                    | 5.151  | 6.256  | -1.106 | 0.465 | 1 | 0.0413<br>7 | 1.089 |
| A_44_P260701      | RGD1565247             | 5.496  | 7.639  | -2.143 | 0.226 | 1 | 0.0433<br>9 | 1.048 |
| A_44_P480735      | XM_224143              | 4.999  | 6.008  | -1.009 | 0.497 | 1 | 0.0433<br>9 | 1.037 |
| A_44_P624391      | TC545311               | 5.873  | 6.962  | -1.089 | 0.47  | 1 | 0.0447<br>2 | 1.003 |
| A_44_P179767      | Amy2                   | 5.208  | 6.094  | -0.886 | 0.541 | 1 | 0.0448<br>5 | 0.979 |
| A_44_P871833      | TC558621               | 6.034  | 8.589  | -2.555 | 0.17  | 1 | 0.0448<br>9 | 0.972 |

|              |              |       |       |        |       |   |             |       |
|--------------|--------------|-------|-------|--------|-------|---|-------------|-------|
| A_44_P645108 | DY471256     | 6.337 | 7.311 | -0.974 | 0.509 | 1 | 0.0455      | 0.95  |
| A_44_P222821 | LOC366772    | 5.94  | 7.474 | -1.534 | 0.345 | 1 | 0.0455      | 0.948 |
| A_43_P10160  | AA945948     | 5.722 | 6.737 | -1.015 | 0.495 | 1 | 0.0477<br>9 | 0.895 |
| A_44_P309160 | LOC304860    | 7.664 | 8.774 | -1.109 | 0.464 | 1 | 0.0481<br>5 | 0.885 |
| A_44_P892359 | AABR03128054 | 5.541 | 7.185 | -1.645 | 0.32  | 1 | 0.0477<br>9 | 0.861 |
| A_44_P314187 | A_44_P314187 | 6.028 | 7.088 | -1.06  | 0.48  | 1 | 0.0486<br>1 | 0.86  |
| A_44_P382501 | Foxr1        | 5.418 | 6.841 | -1.423 | 0.373 | 1 | 0.0486<br>1 | 0.848 |
| A_44_P536698 | A_44_P536698 | 5.298 | 7.09  | -1.792 | 0.289 | 1 | 0.0491<br>4 | 0.848 |
| A_44_P578608 | TC547498     | 5.066 | 6.056 | -0.99  | 0.503 | 1 | 0.0491<br>8 | 0.836 |
| A_44_P141614 | Sms          | 6.359 | 7.726 | -1.367 | 0.388 | 1 | 0.0491<br>6 | 0.826 |
| A_44_P454532 | Ambp         | 5.991 | 7.569 | -1.578 | 0.335 | 1 | 0.0493<br>6 | 0.811 |
| A_44_P446389 | AI230968     | 4.996 | 7.625 | -2.63  | 0.162 | 1 | 0.0507<br>1 | 0.781 |
| A_44_P670043 | TC544335     | 6.598 | 8.822 | -2.224 | 0.214 | 1 | 0.0514<br>8 | 0.775 |
| A_44_P425800 | LOC686808    | 6.3   | 7.505 | -1.205 | 0.434 | 1 | 0.0518<br>6 | 0.75  |
| A_44_P513635 | A_44_P513635 | 8.036 | 9.425 | -1.389 | 0.382 | 1 | 0.052       | 0.742 |
| A_44_P403438 | XM_237142    | 5.805 | 7.65  | -1.845 | 0.278 | 1 | 0.0525<br>6 | 0.723 |
| A_44_P131506 | AA900981     | 5.147 | 6.52  | -1.373 | 0.386 | 1 | 0.0525<br>6 | 0.722 |
| A_44_P370460 | Zfp697       | 5.766 | 7.341 | -1.575 | 0.336 | 1 | 0.0530<br>8 | 0.717 |
| A_44_P188015 | AA818078     | 5.979 | 6.98  | -1.001 | 0.5   | 1 | 0.0530<br>8 | 0.705 |
| A_44_P211202 | Pdcd1        | 5.894 | 6.823 | -0.93  | 0.525 | 1 | 0.0532<br>1 | 0.697 |
| A_44_P318921 | Zfp169       | 6.714 | 7.833 | -1.118 | 0.461 | 1 | 0.0530<br>8 | 0.697 |

|                   |              |       |       |        |       |   |             |       |
|-------------------|--------------|-------|-------|--------|-------|---|-------------|-------|
| A_44_P545677      | Pou3f2       | 5.234 | 7.066 | -1.832 | 0.281 | 1 | 0.0532<br>1 | 0.689 |
| A_44_P339490      | LOC316432    | 5.147 | 5.912 | -0.766 | 0.588 | 1 | 0.0532<br>1 | 0.683 |
| A_44_P199638      | AA900220     | 5.417 | 6.882 | -1.465 | 0.362 | 1 | 0.0537<br>8 | 0.667 |
| A_44_P865695      | AW525937     | 5.968 | 7.206 | -1.238 | 0.424 | 1 | 0.0537<br>8 | 0.639 |
| A_44_P288603      | RGD1563131   | 5.205 | 6.232 | -1.027 | 0.491 | 1 | 0.0537<br>8 | 0.638 |
| A_44_P347187      | RGD1564836   | 5.729 | 7.827 | -2.097 | 0.234 | 1 | 0.0537<br>8 | 0.633 |
| A_44_P333853      | AA924381     | 5.686 | 6.624 | -0.939 | 0.522 | 1 | 0.054       | 0.626 |
| A_44_P158828      | XM_344353    | 5.222 | 6.582 | -1.36  | 0.39  | 1 | 0.0537<br>8 | 0.623 |
| A_44_P489869      | Igsf2        | 5.591 | 6.724 | -1.133 | 0.456 | 1 | 0.0537<br>8 | 0.62  |
| A_42_P584710      | Robo2        | 6.284 | 7.883 | -1.599 | 0.33  | 1 | 0.0540<br>9 | 0.605 |
| A_44_P158129      | RAMP4        | 5.468 | 6.154 | -0.686 | 0.622 | 1 | 0.0544<br>2 | 0.59  |
| A_44_P264477      | Pacsin1      | 5.448 | 6.785 | -1.336 | 0.396 | 1 | 0.0544<br>2 | 0.59  |
| A_44_P107107<br>0 | AI407573     | 5.391 | 6.658 | -1.267 | 0.416 | 1 | 0.0559<br>7 | 0.565 |
| A_44_P123461      | Olr1304      | 5.38  | 6.161 | -0.78  | 0.582 | 1 | 0.0557<br>7 | 0.563 |
| A_44_P419406      | A_44_P419406 | 5.336 | 6.281 | -0.945 | 0.519 | 1 | 0.0559<br>7 | 0.547 |
| A_44_P457697      | AI113328     | 5.61  | 7.037 | -1.427 | 0.372 | 1 | 0.0559<br>7 | 0.547 |
| A_44_P248227      | XM_224126    | 5.746 | 6.883 | -1.136 | 0.455 | 1 | 0.0563<br>2 | 0.535 |
| A_44_P288134      | AB072242     | 5.254 | 7.006 | -1.752 | 0.297 | 1 | 0.0559<br>7 | 0.532 |
| A_44_P165800      | Dspp         | 5.167 | 6.406 | -1.239 | 0.424 | 1 | 0.0563<br>2 | 0.515 |
| A_44_P243163      | Chx10        | 5.896 | 7.129 | -1.233 | 0.425 | 1 | 0.0568<br>5 | 0.507 |

|              |            |        |        |        |       |   |             |       |
|--------------|------------|--------|--------|--------|-------|---|-------------|-------|
| A_44_P457929 | BE108303   | 5.446  | 6.63   | -1.184 | 0.44  | 1 | 0.0568<br>5 | 0.492 |
| A_44_P529845 | RGD1564276 | 5.683  | 6.728  | -1.044 | 0.485 | 1 | 0.0568<br>5 | 0.482 |
| A_44_P426689 | LOC295528  | 6.238  | 7.527  | -1.289 | 0.409 | 1 | 0.0568<br>5 | 0.481 |
| A_42_P745602 | Vipr2      | 10.157 | 11.571 | -1.414 | 0.375 | 1 | 0.0568<br>5 | 0.479 |
| A_44_P319368 | AA925264   | 5.273  | 6.159  | -0.886 | 0.541 | 1 | 0.0568<br>5 | 0.477 |
| A_44_P351263 | Ly6g6f     | 5.984  | 7.942  | -1.958 | 0.257 | 1 | 0.0572<br>5 | 0.471 |
| A_44_P256290 | RGD1559578 | 5.015  | 6.166  | -1.15  | 0.451 | 1 | 0.0572<br>5 | 0.456 |
| A_44_P543179 | Olr1684    | 5.092  | 6.053  | -0.962 | 0.513 | 1 | 0.0575<br>3 | 0.455 |
| A_44_P297633 | Irx3       | 7.329  | 8.593  | -1.264 | 0.416 | 1 | 0.0572<br>5 | 0.453 |
| A_44_P143337 | AI102280   | 5.919  | 7.779  | -1.86  | 0.276 | 1 | 0.0575<br>3 | 0.435 |
| A_43_P13259  | Efha1      | 5.02   | 6.17   | -1.15  | 0.451 | 1 | 0.0575<br>3 | 0.432 |
| A_44_P175115 | Olr298     | 4.979  | 6.373  | -1.394 | 0.38  | 1 | 0.0584<br>4 | 0.417 |
| A_44_P318628 | Chrb2      | 5.421  | 7.176  | -1.755 | 0.296 | 1 | 0.0584<br>4 | 0.415 |
| A_44_P298004 | AA957586   | 7.211  | 7.969  | -0.758 | 0.591 | 1 | 0.0583<br>8 | 0.414 |
| A_44_P466159 | Centa1     | 6.267  | 7.578  | -1.311 | 0.403 | 1 | 0.0584<br>4 | 0.404 |
| A_44_P114932 | AA924684   | 6.121  | 6.971  | -0.849 | 0.555 | 1 | 0.0585<br>7 | 0.398 |
| A_44_P413151 | BM389417   | 5.777  | 6.858  | -1.082 | 0.473 | 1 | 0.0585<br>9 | 0.393 |
| A_44_P410265 | RGD1562126 | 5.118  | 6.234  | -1.116 | 0.461 | 1 | 0.0585<br>7 | 0.384 |
| A_44_P439703 | BQ209193   | 5.155  | 6.171  | -1.016 | 0.494 | 1 | 0.0585<br>7 | 0.382 |
| A_44_P102369 | Socs1      | 7.126  | 8.04   | -0.913 | 0.531 | 1 | 0.0591<br>4 | 0.377 |

|               |                    |       |        |        |       |   |         |       |
|---------------|--------------------|-------|--------|--------|-------|---|---------|-------|
| A_44_P379301  | BF283053           | 5.712 | 7.434  | -1.722 | 0.303 | 1 | 0.05918 | 0.372 |
| A_44_P215447  | Pbxip1             | 6.47  | 8.313  | -1.843 | 0.279 | 1 | 0.05951 | 0.365 |
| A_44_P501281  | Pvrl1              | 6.008 | 7.824  | -1.816 | 0.284 | 1 | 0.05914 | 0.361 |
| A_44_P817120  | BF563826           | 5.08  | 6.318  | -1.237 | 0.424 | 1 | 0.05951 | 0.356 |
| A_44_P473524  | Snx30              | 6.428 | 7.639  | -1.211 | 0.432 | 1 | 0.05978 | 0.354 |
| A_44_P638910  | TC557610           | 8.959 | 10.358 | -1.399 | 0.379 | 1 | 0.05951 | 0.338 |
| A_44_P402705  | Rab3b              | 6.343 | 7.985  | -1.643 | 0.32  | 1 | 0.05951 | 0.337 |
| A_44_P517884  | Hist2h4            | 6.39  | 8.928  | -2.537 | 0.172 | 1 | 0.05951 | 0.337 |
| A_44_P153915  | ENSRNOT00000044774 | 5.137 | 6.57   | -1.434 | 0.37  | 1 | 0.05978 | 0.333 |
| A_44_P342788  | Wnt10a             | 5.937 | 7.861  | -1.924 | 0.264 | 1 | 0.05951 | 0.331 |
| A_44_P241223  | XM_224708          | 5.553 | 7.159  | -1.606 | 0.329 | 1 | 0.05951 | 0.316 |
| A_44_P407276  | Olr1512            | 5.38  | 6.439  | -1.059 | 0.48  | 1 | 0.0603  | 0.3   |
| A_44_P766752  | CV102938           | 5.679 | 7.122  | -1.443 | 0.368 | 1 | 0.06089 | 0.3   |
| A_44_P965229  | TC533445           | 7.157 | 8.717  | -1.56  | 0.339 | 1 | 0.06177 | 0.299 |
| A_44_P293374  | Kremen2            | 5.901 | 7.301  | -1.4   | 0.379 | 1 | 0.0603  | 0.288 |
| A_44_P146173  | AI058658           | 6.405 | 7.896  | -1.491 | 0.356 | 1 | 0.06089 | 0.269 |
| A_44_P466896  | AI113011           | 5.675 | 7.021  | -1.346 | 0.393 | 1 | 0.06089 | 0.265 |
| A_44_P132903  | Cacna1c            | 5.154 | 6.2    | -1.046 | 0.484 | 1 | 0.06246 | 0.252 |
| A_44_P1027780 | Cap350             | 6.715 | 7.566  | -0.851 | 0.554 | 1 | 0.0636  | 0.244 |
| A_44_P286773  | LOC690853          | 6.31  | 7.343  | -1.033 | 0.489 | 1 | 0.06321 | 0.219 |
| A_44_P236412  | A_44_P236412       | 5.267 | 5.946  | -0.679 | 0.625 | 1 | 0.0636  | 0.207 |

|              |              |       |       |        |       |   |             |       |
|--------------|--------------|-------|-------|--------|-------|---|-------------|-------|
|              |              |       |       |        |       |   | 5           |       |
| A_44_P471233 | RGD1560293   | 5.768 | 7.752 | -1.984 | 0.253 | 1 | 0.0636<br>5 | 0.202 |
| A_44_P548079 | Atp2a3       | 5.326 | 7.208 | -1.881 | 0.271 | 1 | 0.0636<br>5 | 0.191 |
| A_44_P342841 | BG380737     | 5.443 | 7.439 | -1.996 | 0.251 | 1 | 0.0636<br>5 | 0.186 |
| A_44_P326350 | LOC366515    | 7.993 | 8.779 | -0.785 | 0.58  | 1 | 0.0636<br>5 | 0.182 |
| A_44_P213560 | BF283609     | 5.487 | 6.299 | -0.811 | 0.57  | 1 | 0.0636<br>5 | 0.177 |
| A_42_P688027 | Crhr1        | 5.797 | 7.061 | -1.264 | 0.416 | 1 | 0.0636<br>5 | 0.168 |
| A_44_P133544 | XM_345798    | 5.632 | 7.404 | -1.772 | 0.293 | 1 | 0.0636<br>5 | 0.167 |
| A_44_P352071 | A_44_P352071 | 5.141 | 5.974 | -0.833 | 0.561 | 1 | 0.0636<br>5 | 0.163 |
| A_44_P532850 | AA818301     | 5.163 | 6.655 | -1.492 | 0.356 | 1 | 0.0636<br>5 | 0.159 |
| A_44_P452978 | BE110169     | 6.6   | 7.405 | -0.804 | 0.573 | 1 | 0.0640<br>8 | 0.155 |
| A_44_P414785 | A_44_P414785 | 5.521 | 6.301 | -0.78  | 0.582 | 1 | 0.0636<br>5 | 0.154 |
| A_44_P395788 | Wnt7a        | 5.727 | 6.957 | -1.23  | 0.426 | 1 | 0.0636<br>5 | 0.149 |
| A_44_P523361 | AI137731     | 5.53  | 6.731 | -1.2   | 0.435 | 1 | 0.0637<br>8 | 0.144 |
| A_44_P360017 | Gmcl1        | 5.549 | 6.56  | -1.01  | 0.496 | 1 | 0.0645<br>8 | 0.122 |
| A_44_P163599 | XM_344897    | 5.225 | 6.8   | -1.574 | 0.336 | 1 | 0.0645<br>8 | 0.119 |
| A_44_P548151 | Dlgap2       | 5.239 | 6.666 | -1.426 | 0.372 | 1 | 0.0647<br>3 | 0.113 |
| A_44_P553218 | RGD1563918   | 5.426 | 6.842 | -1.416 | 0.375 | 1 | 0.0647<br>3 | 0.11  |
| A_44_P158441 | Nr3c2        | 5.369 | 6.543 | -1.174 | 0.443 | 1 | 0.0647<br>3 | 0.103 |
| A_44_P330188 | Acox2        | 5.752 | 7.105 | -1.353 | 0.391 | 1 | 0.0647<br>3 | 0.103 |

|              |              |       |       |        |       |   |             |       |
|--------------|--------------|-------|-------|--------|-------|---|-------------|-------|
| A_44_P320908 | AF403546     | 5.069 | 6.638 | -1.569 | 0.337 | 1 | 0.0647<br>3 | 0.103 |
| A_44_P263049 | Pgk2         | 5.071 | 5.933 | -0.861 | 0.55  | 1 | 0.0649<br>8 | 0.102 |
| A_44_P171305 | XM_345875    | 5.577 | 7.512 | -1.936 | 0.261 | 1 | 0.0647<br>3 | 0.096 |
| A_44_P154522 | RGD1566031   | 5.316 | 6.869 | -1.552 | 0.341 | 1 | 0.0647<br>3 | 0.094 |
| A_44_P227367 | LOC317471    | 4.99  | 5.907 | -0.918 | 0.529 | 1 | 0.0666<br>4 | 0.071 |
| A_44_P414803 | XM_344351    | 5.31  | 6.802 | -1.492 | 0.355 | 1 | 0.0657<br>7 | 0.069 |
| A_44_P220466 | RGD1310845   | 5.613 | 6.533 | -0.92  | 0.528 | 1 | 0.0659<br>4 | 0.064 |
| A_44_P985331 | CK469557     | 5.618 | 7.257 | -1.639 | 0.321 | 1 | 0.0661<br>4 | 0.058 |
| A_44_P621427 | RGD1565206   | 5.222 | 6.147 | -0.925 | 0.527 | 1 | 0.0666<br>4 | 0.047 |
| A_44_P131443 | LOC500300    | 5.724 | 7.618 | -1.894 | 0.269 | 1 | 0.0666<br>4 | 0.041 |
| A_44_P245474 | Hal          | 5.517 | 7.154 | -1.637 | 0.322 | 1 | 0.0666<br>4 | 0.039 |
| A_44_P149743 | Sema6a       | 6.17  | 7.368 | -1.198 | 0.436 | 1 | 0.0667<br>3 | 0.03  |
| A_44_P135576 | A_44_P135576 | 5.374 | 7.419 | -2.045 | 0.242 | 1 | 0.0674<br>7 | 0.029 |
| A_44_P492491 | A_44_P492491 | 5.065 | 6.354 | -1.289 | 0.409 | 1 | 0.0672<br>3 | 0.02  |
| A_44_P553799 | AA925599     | 5.273 | 6.112 | -0.838 | 0.559 | 1 | 0.0675<br>2 | 0.008 |

| forebrain        |              |                    |                     |       |       |             |             |       |
|------------------|--------------|--------------------|---------------------|-------|-------|-------------|-------------|-------|
| ID               | ShortName    | ForeB.DHT.<br>aveA | ForeB.Ctrl.<br>aveA | M     | Fold  | AdjP        | FDR         | B     |
| A_44_P426<br>087 | Opcml        | 10.29              | 8.908               | 1.383 | 2.608 | 0.2756<br>9 | 0.0106<br>9 | 3.734 |
| A_44_P944<br>294 | LOC499617    | 10.359             | 9.488               | 0.87  | 1.828 | 0.714       | 0.0193<br>1 | 2.918 |
| A_44_P391<br>638 | Pcdh12       | 7.351              | 5.855               | 1.496 | 2.821 | 0.8040<br>5 | 0.0206<br>4 | 2.815 |
| A_43_P195<br>32  | Dpp10        | 10.793             | 9.649               | 1.144 | 2.21  | 1           | 0.0251<br>2 | 2.577 |
| A_44_P234<br>077 | XM_228776    | 11.654             | 10.208              | 1.445 | 2.723 | 1           | 0.0275      | 2.13  |
| A_44_P252<br>362 | BG666431     | 10.034             | 8.941               | 1.092 | 2.132 | 1           | 0.0355<br>1 | 2.078 |
| A_44_P426<br>079 | Kcnc1        | 11.005             | 9.658               | 1.348 | 2.545 | 1           | 0.0389<br>6 | 1.974 |
| A_44_P601<br>020 | A_44_P601020 | 7.93               | 6.946               | 0.983 | 1.977 | 1           | 0.0434<br>3 | 1.822 |
| A_44_P442<br>889 | Npy1r        | 8.095              | 6.96                | 1.135 | 2.196 | 1           | 0.0546      | 1.52  |
| A_43_P101<br>62  | Odz3         | 7.895              | 6.766               | 1.129 | 2.188 | 1           | 0.0546      | 1.513 |
| A_44_P548<br>581 | Fus          | 10.744             | 9.514               | 1.23  | 2.346 | 1           | 0.0654<br>6 | 1.288 |
| A_44_P751<br>732 | CO397565     | 10.511             | 8.764               | 1.747 | 3.358 | 1           | 0.0657<br>6 | 1.26  |
| A_44_P168<br>184 | Ran          | 11.695             | 10.707              | 0.988 | 1.984 | 1           | 0.0731<br>4 | 1.094 |
| A_44_P168<br>487 | XM_344363    | 9.389              | 8.225               | 1.164 | 2.241 | 1           | 0.0787      | 0.975 |
| A_44_P987<br>960 | CO398009     | 11.183             | 10.182              | 1.001 | 2.001 | 1           | 0.0813<br>1 | 0.919 |
| A_44_P863<br>776 | AW143280     | 10.148             | 9.219               | 0.928 | 1.903 | 1           | 0.0818<br>6 | 0.897 |
| A_44_P778<br>129 | Bai3         | 8.805              | 7.846               | 0.959 | 1.944 | 1           | 0.0818<br>6 | 0.893 |
| A_44_P283<br>886 | RGD1310192   | 9.512              | 8.512               | 1     | 2     | 1           | 0.0822<br>5 | 0.879 |
| A_42_P485<br>015 | Lrrc4c       | 12.396             | 10.858              | 1.539 | 2.905 | 1           | 0.0838<br>2 | 0.846 |
| A_44_P447<br>869 | RGD1306118   | 9.469              | 8.747               | 0.722 | 1.65  | 1           | 0.0838<br>2 | 0.833 |
| A_44_P312<br>309 | Eif3s10      | 11.415             | 10.429              | 0.986 | 1.98  | 1           | 0.0857      | 0.766 |
| A_44_P253<br>755 | AA899663     | 12.046             | 10.47               | 1.576 | 2.981 | 1           | 0.0857      | 0.731 |
| A_44_P236<br>255 | Calb1        | 11.612             | 10.333              | 1.279 | 2.427 | 1           | 0.0868<br>5 | 0.704 |
| A_44_P499<br>171 | Mttr7        | 9.81               | 8.899               | 0.91  | 1.879 | 1           | 0.0880<br>6 | 0.663 |
| A_44_P680<br>949 | AW143235     | 9.583              | 8.627               | 0.955 | 1.939 | 1           | 0.0880<br>6 | 0.638 |
| A_44_P408<br>165 | LOC303332    | 10.844             | 9.914               | 0.93  | 1.905 | 1           | 0.0907<br>9 | 0.624 |
| A_43_P158<br>01  | Lancl1       | 11.884             | 10.906              | 0.979 | 1.97  | 1           | 0.0937<br>6 | 0.548 |
| A_44_P218<br>014 | Ruvbl1       | 10.335             | 9.55                | 0.785 | 1.723 | 1           | 0.0946<br>2 | 0.526 |
| A_44_P314<br>122 | XM_212821    | 12.33              | 11.035              | 1.295 | 2.454 | 1           | 0.0946<br>2 | 0.525 |
| A_42_P735<br>353 | Scye1        | 11.78              | 10.962              | 0.819 | 1.764 | 1           | 0.0962<br>7 | 0.499 |
| A_43_P210<br>88  | RGD1306214   | 8.028              | 6.684               | 1.343 | 2.537 | 1           | 0.0963<br>2 | 0.487 |



|                  |              |        |        |        |       |              |              |        |
|------------------|--------------|--------|--------|--------|-------|--------------|--------------|--------|
| A_44_P285<br>390 | Atp6v1d      | 12.5   | 11.624 | 0.876  | 1.835 | 1            | 0.0967<br>4  | 0.465  |
| A_44_P501<br>483 | LOC310385    | 14.65  | 13.58  | 1.07   | 2.1   | 1            | 0.0967<br>4  | 0.461  |
| A_42_P558<br>503 | Brd2         | 13.454 | 12.615 | 0.839  | 1.789 | 1            | 0.0969<br>2  | 0.452  |
| A_44_P379<br>878 | Fbxo34       | 11.595 | 10.543 | 1.052  | 2.073 | 1            | 0.0969<br>2  | 0.44   |
| A_44_P211<br>061 | Etv1         | 10.577 | 9.391  | 1.186  | 2.275 | 1            | 0.0969<br>2  | 0.432  |
| A_44_P282<br>940 | AA963785     | 7.666  | 6.697  | 0.969  | 1.957 | 1            | 0.0969<br>2  | 0.417  |
| A_43_P205<br>68  | RGD1311526   | 10.09  | 9.332  | 0.757  | 1.691 | 1            | 0.0996<br>9  | 0.391  |
| A_44_P443<br>030 | sept6        | 10.251 | 9.184  | 1.067  | 2.095 | 1            | 0.1076<br>4  | 0.29   |
| A_44_P407<br>707 | Nufip1       | 11.235 | 10.499 | 0.736  | 1.666 | 1            | 0.1105<br>6  | 0.234  |
| A_44_P490<br>206 | Eif1b        | 12.644 | 11.926 | 0.718  | 1.645 | 1            | 0.1114       | 0.213  |
| A_44_P149<br>993 | Syt1         | 9.713  | 8.8    | 0.914  | 1.884 | 1            | 0.1114       | 0.211  |
| A_44_P182<br>715 | Zfyve28      | 8.352  | 7.446  | 0.907  | 1.875 | 1            | 0.1114       | 0.193  |
| A_44_P210<br>686 | TC517135     | 9.434  | 8.363  | 1.071  | 2.101 | 1            | 0.1117<br>2  | 0.186  |
| A_44_P487<br>021 | Rasl11b      | 10.123 | 8.78   | 1.343  | 2.537 | 1            | 0.1117<br>2  | 0.18   |
| A_44_P452<br>282 | Kcnj3        | 7.602  | 6.707  | 0.895  | 1.86  | 1            | 0.1117<br>2  | 0.159  |
| A_44_P423<br>914 | LOC502338    | 9.518  | 8.094  | 1.424  | 2.683 | 1            | 0.1155<br>7  | 0.106  |
| A_44_P354<br>008 | Pcdh9        | 9.163  | 8.215  | 0.948  | 1.929 | 1            | 0.1158<br>3  | 0.098  |
| A_44_P989<br>250 | CV120833     | 8.98   | 8.017  | 0.964  | 1.95  | 1            | 0.1165<br>3  | 0.094  |
| A_44_P311<br>484 | Cntn3        | 7.74   | 6.742  | 0.999  | 1.998 | 1            | 0.1188<br>5  | 0.058  |
| A_44_P854<br>174 | CO403204     | 9.462  | 8.355  | 1.107  | 2.154 | 1            | 0.1199<br>9  | 0.028  |
| A_44_P917<br>564 | LOC683630    | 12.604 | 11.503 | 1.102  | 2.146 | 1            | 0.1222       | 0.009  |
| A_44_P344<br>664 | RGD1309922   | 8.543  | 7.717  | 0.827  | 1.774 | 1            | 0.1217<br>2  | 0.003  |
| A_42_P686<br>427 | AW142560     | 6.322  | 12.445 | -6.123 | 0.014 | 0            | 0            | 12.287 |
| A_43_P154<br>47  | Bglap2       | 6.433  | 9.39   | -2.957 | 0.129 | 1.00E-<br>05 | 0            | 11.76  |
| A_44_P475<br>564 | Glycam1      | 6.012  | 11.477 | -5.465 | 0.023 | 0            | 0            | 11.449 |
| A_44_P555<br>002 | Gpr151       | 5.109  | 7.59   | -2.481 | 0.179 | 0.0002<br>8  | 7.00E-<br>05 | 9.273  |
| A_42_P575<br>104 | Sostdc1      | 6.695  | 12.399 | -5.704 | 0.019 | 0.0003<br>8  | 8.00E-<br>05 | 8.635  |
| A_42_P515<br>580 | Tmem27       | 5.439  | 8.649  | -3.21  | 0.108 | 0.0024<br>4  | 0.0004<br>1  | 7.612  |
| A_44_P608<br>258 | TC559290     | 5.164  | 8.186  | -3.022 | 0.123 | 0.0045<br>8  | 0.0005<br>7  | 7.117  |
| A_44_P299<br>247 | Aqp1         | 7.909  | 10.182 | -2.273 | 0.207 | 0.0065<br>1  | 0.0007<br>2  | 6.836  |
| A_43_P155<br>11  | Slc5a7       | 6.702  | 8.588  | -1.886 | 0.271 | 0.0093<br>5  | 0.0009<br>3  | 6.546  |
| A_44_P838<br>355 | TC539813     | 5.754  | 9.009  | -3.255 | 0.105 | 0.0032<br>8  | 0.0004<br>7  | 6.536  |
| A_44_P889<br>730 | A_44_P889730 | 6.522  | 11.122 | -4.6   | 0.041 | 0.0236<br>7  | 0.0019<br>9  | 5.79   |
| A_43_P230<br>92  | F5           | 6.187  | 8.662  | -2.475 | 0.18  | 0.0238<br>3  | 0.0019<br>9  | 5.785  |

|                   |            |        |        |        |       |             |             |       |
|-------------------|------------|--------|--------|--------|-------|-------------|-------------|-------|
| A_44_P561<br>510  | Otx2       | 5.713  | 11.29  | -5.578 | 0.021 | 0.0326<br>7 | 0.0025<br>1 | 5.491 |
| A_44_P803<br>684  | AA801133   | 7.352  | 9.283  | -1.931 | 0.262 | 0.0487<br>1 | 0.0034<br>8 | 5.194 |
| A_44_P449<br>623  | CLIC6      | 5.526  | 7.785  | -2.259 | 0.209 | 0.0562<br>4 | 0.0037<br>5 | 5.075 |
| A_42_P676<br>553  | Tnni3      | 7.19   | 9.299  | -2.108 | 0.232 | 0.0724      | 0.0041<br>7 | 4.864 |
| A_44_P262<br>989  | Mfrp       | 5.473  | 7.673  | -2.2   | 0.218 | 0.0770<br>5 | 0.0041<br>7 | 4.812 |
| A_43_P195<br>03   | Sec3l1     | 5.518  | 7.216  | -1.698 | 0.308 | 0.0791<br>2 | 0.0041<br>7 | 4.79  |
| A_44_P835<br>198  | AI072934   | 5.637  | 8.026  | -2.389 | 0.191 | 0.0790<br>8 | 0.0041<br>7 | 4.782 |
| A_44_P102<br>5667 | Ccdc37     | 8.172  | 10.236 | -2.064 | 0.239 | 0.1059<br>5 | 0.0051      | 4.544 |
| A_44_P809<br>953  | TC531958   | 6.353  | 8.978  | -2.625 | 0.162 | 0.1069<br>8 | 0.0051      | 4.531 |
| A_42_P604<br>382  | RGD1561064 | 7.157  | 8.859  | -1.702 | 0.307 | 0.1652<br>8 | 0.0075<br>2 | 4.162 |
| A_44_P808<br>922  | TC561113   | 5.506  | 7.557  | -2.051 | 0.241 | 0.2095<br>7 | 0.0091<br>2 | 3.968 |
| A_44_P746<br>348  | RGD1562658 | 7.325  | 9.657  | -2.332 | 0.199 | 0.2421      | 0.0100<br>9 | 3.845 |
| A_44_P745<br>827  | TC539254   | 7.579  | 9.315  | -1.736 | 0.3   | 0.2778<br>2 | 0.0106<br>9 | 3.728 |
| A_44_P101<br>3007 | Elmo3      | 8.768  | 10.199 | -1.431 | 0.371 | 0.3053<br>8 | 0.0107<br>2 | 3.647 |
| A_43_P153<br>07   | Mdk        | 12.074 | 13.801 | -1.727 | 0.302 | 0.3103<br>6 | 0.0107<br>2 | 3.633 |
| A_44_P513<br>075  | Ace        | 8.779  | 10.597 | -1.817 | 0.284 | 0.3107      | 0.0107<br>2 | 3.632 |
| A_44_P593<br>071  | TC525061   | 7.877  | 10.38  | -2.503 | 0.176 | 0.3452<br>6 | 0.0115<br>2 | 3.542 |
| A_44_P473<br>715  | XM_237297  | 8.419  | 10.632 | -2.213 | 0.216 | 0.4939<br>6 | 0.0159<br>5 | 3.235 |
| A_44_P591<br>729  | Gnal       | 8.615  | 10.044 | -1.429 | 0.371 | 0.5440<br>3 | 0.0170<br>1 | 3.16  |
| A_44_P960<br>606  | TC556438   | 7.836  | 9.823  | -1.988 | 0.252 | 0.5890<br>6 | 0.0178<br>6 | 3.084 |
| A_44_P103<br>4950 | Adora2a    | 9.842  | 11.954 | -2.112 | 0.231 | 0.6320<br>7 | 0.0186<br>1 | 3.023 |
| A_44_P400<br>494  | Krt1-18    | 8.669  | 11.955 | -3.286 | 0.103 | 0.6584<br>7 | 0.0188<br>3 | 2.981 |
| A_44_P654<br>339  | TC526364   | 6.352  | 8.75   | -2.398 | 0.19  | 0.6801<br>5 | 0.0189<br>1 | 2.96  |
| A_43_P141<br>99   | TC562565   | 9.059  | 10.601 | -1.542 | 0.343 | 0.7621<br>9 | 0.0200<br>8 | 2.862 |
| A_44_P740<br>525  | RGD1565362 | 8.053  | 9.44   | -1.387 | 0.382 | 0.9144<br>8 | 0.0223<br>3 | 2.71  |
| A_44_P608<br>133  | TC566757   | 5.842  | 9.821  | -3.979 | 0.063 | 0.9086<br>7 | 0.0223<br>3 | 2.71  |
| A_43_P125<br>58   | Kl         | 5.392  | 6.933  | -1.541 | 0.344 | 1           | 0.0251<br>2 | 2.561 |
| A_43_P147<br>95   | MGC112844  | 9.832  | 10.765 | -0.933 | 0.524 | 1           | 0.0265<br>4 | 2.493 |
| A_44_P670<br>773  | TC560986   | 7.21   | 8.902  | -1.692 | 0.31  | 1           | 0.0274<br>3 | 2.445 |
| A_42_P521<br>242  | RGD1561932 | 8.042  | 10.342 | -2.3   | 0.203 | 1           | 0.0274<br>6 | 2.425 |
| A_44_P449<br>938  | Kcnj13     | 7.934  | 10.42  | -2.486 | 0.179 | 1           | 0.0311<br>4 | 2.279 |
| A_42_P678<br>904  | RGD1563547 | 8.896  | 11.565 | -2.669 | 0.157 | 1           | 0.0322<br>9 | 2.238 |
| A_44_P992<br>367  | Tulp2      | 6.395  | 7.641  | -1.246 | 0.422 | 1           | 0.0322<br>9 | 2.207 |
| A_44_P659<br>117  | Zic4       | 6.268  | 8.104  | -1.836 | 0.28  | 1           | 0.0322<br>9 | 2.195 |

|                   |            |        |        |        |       |   |             |       |
|-------------------|------------|--------|--------|--------|-------|---|-------------|-------|
| A_44_P502<br>941  | Al069964   | 6.458  | 7.442  | -0.984 | 0.506 | 1 | 0.0343<br>6 | 2.132 |
| A_44_P536<br>645  | RGD1560137 | 7.507  | 9.388  | -1.882 | 0.271 | 1 | 0.0360<br>1 | 2.05  |
| A_44_P524<br>779  | Slc4a5     | 5.575  | 6.992  | -1.416 | 0.375 | 1 | 0.0390<br>4 | 1.948 |
| A_43_P162<br>03   | Bm259      | 7.612  | 9.139  | -1.527 | 0.347 | 1 | 0.0434<br>3 | 1.831 |
| A_44_P700<br>971  | TC524582   | 5.897  | 7.431  | -1.534 | 0.345 | 1 | 0.0434<br>3 | 1.808 |
| A_44_P220<br>325  | Dynlrb2    | 8.593  | 10.533 | -1.94  | 0.261 | 1 | 0.0434<br>3 | 1.795 |
| A_44_P175<br>758  | Rshl3      | 6.146  | 8.063  | -1.917 | 0.265 | 1 | 0.0462<br>6 | 1.725 |
| A_44_P101<br>8622 | RGD1359691 | 9.441  | 10.66  | -1.219 | 0.43  | 1 | 0.0488<br>8 | 1.663 |
| A_42_P782<br>490  | RGD1560268 | 9.351  | 10.713 | -1.362 | 0.389 | 1 | 0.0496<br>5 | 1.635 |
| A_44_P835<br>847  | AW917132   | 6.041  | 7.674  | -1.633 | 0.322 | 1 | 0.0523<br>3 | 1.575 |
| A_44_P593<br>525  | Atp11c     | 8.7    | 9.944  | -1.244 | 0.422 | 1 | 0.0546      | 1.485 |
| A_42_P755<br>326  | Itgb6      | 6.649  | 9.043  | -2.394 | 0.19  | 1 | 0.0546      | 1.443 |
| A_43_P131<br>99   | Folr1      | 7.113  | 9.783  | -2.67  | 0.157 | 1 | 0.0591<br>1 | 1.413 |
| A_44_P445<br>575  | Irx2       | 5.519  | 7.334  | -1.815 | 0.284 | 1 | 0.0595<br>4 | 1.394 |
| A_44_P513<br>910  | CB547655   | 5.316  | 6.41   | -1.094 | 0.468 | 1 | 0.0654<br>7 | 1.276 |
| A_42_P510<br>565  | RGD1306603 | 9.71   | 12.078 | -2.369 | 0.194 | 1 | 0.0668      | 1.222 |
| A_44_P716<br>655  | RGD1561795 | 5.863  | 8.536  | -2.674 | 0.157 | 1 | 0.0686<br>3 | 1.197 |
| A_44_P437<br>565  | AF295545   | 12.061 | 13.139 | -1.078 | 0.474 | 1 | 0.0727<br>6 | 1.124 |
| A_44_P808<br>710  | LOC684158  | 5.649  | 7.977  | -2.329 | 0.199 | 1 | 0.0731<br>4 | 1.081 |
| A_44_P393<br>531  | Adipoq     | 5.535  | 7.045  | -1.51  | 0.351 | 1 | 0.0731<br>4 | 1.071 |
| A_44_P251<br>008  | Efhb       | 6.159  | 7.967  | -1.807 | 0.286 | 1 | 0.0731<br>4 | 1.064 |
| A_44_P399<br>864  | Slc17a6    | 6.028  | 7.378  | -1.349 | 0.392 | 1 | 0.0668      | 1.055 |
| A_44_P180<br>262  | RGD1562397 | 11.608 | 12.476 | -0.868 | 0.548 | 1 | 0.0731<br>4 | 1.053 |
| A_44_P866<br>091  | Slc12a7    | 8.835  | 9.661  | -0.826 | 0.564 | 1 | 0.0731<br>4 | 1.043 |
| A_43_P229<br>44   | Tepp       | 7.914  | 9.652  | -1.738 | 0.3   | 1 | 0.0682<br>1 | 1.023 |
| A_43_P191<br>55   | RGD1565362 | 7.372  | 8.486  | -1.115 | 0.462 | 1 | 0.0787      | 0.958 |
| A_42_P737<br>738  | Slc18a3    | 9.166  | 10.744 | -1.578 | 0.335 | 1 | 0.0838<br>2 | 0.84  |
| A_44_P556<br>989  | Ngfr       | 6.979  | 8.18   | -1.201 | 0.435 | 1 | 0.0838<br>2 | 0.802 |
| A_44_P623<br>578  | TC523914   | 8.061  | 9.888  | -1.828 | 0.282 | 1 | 0.0838<br>2 | 0.8   |
| A_44_P171<br>416  | AA818664   | 7.111  | 7.973  | -0.862 | 0.55  | 1 | 0.0838<br>2 | 0.797 |
| A_44_P977<br>161  | TC527222   | 5.431  | 7.72   | -2.289 | 0.205 | 1 | 0.0838<br>2 | 0.797 |
| A_43_P119<br>83   | Rgs9       | 10.732 | 12.69  | -1.958 | 0.257 | 1 | 0.0857      | 0.761 |
| A_42_P623<br>666  | LOC301295  | 7.291  | 8.47   | -1.18  | 0.441 | 1 | 0.0857      | 0.725 |
| A_44_P416<br>824  | Otx2       | 5.953  | 8.122  | -2.169 | 0.222 | 1 | 0.0857      | 0.724 |

|                   |              |        |        |        |       |   |             |       |
|-------------------|--------------|--------|--------|--------|-------|---|-------------|-------|
| A_43_P224<br>01   | RGD1565856   | 9.779  | 10.782 | -1.003 | 0.499 | 1 | 0.0880<br>3 | 0.675 |
| A_42_P763<br>224  | Scgb1c1      | 8.499  | 11.732 | -3.233 | 0.106 | 1 | 0.0880<br>3 | 0.675 |
| A_44_P205<br>869  | Gpr149       | 8.951  | 10.008 | -1.057 | 0.481 | 1 | 0.0880<br>6 | 0.668 |
| A_44_P102<br>1361 | Tlr3         | 8.033  | 9.078  | -1.045 | 0.485 | 1 | 0.0880<br>6 | 0.646 |
| A_44_P159<br>400  | XM_234370    | 11.023 | 12.321 | -1.298 | 0.407 | 1 | 0.0880<br>6 | 0.64  |
| A_42_P833<br>096  | Kcnj16       | 7.614  | 9.223  | -1.61  | 0.328 | 1 | 0.0919<br>4 | 0.585 |
| A_43_P122<br>57   | Esm1         | 5.73   | 8.659  | -2.93  | 0.131 | 1 | 0.0919<br>4 | 0.578 |
| A_44_P175<br>003  | Ttr          | 7.936  | 16.906 | -8.971 | 0.002 | 1 | 0.0857      | 0.54  |
| A_44_P100<br>2996 | LOC293494    | 10.33  | 11.485 | -1.155 | 0.449 | 1 | 0.0962<br>7 | 0.532 |
| A_44_P577<br>744  | TC526324     | 7.267  | 8.159  | -0.892 | 0.539 | 1 | 0.0967<br>4 | 0.479 |
| A_44_P627<br>557  | TC534031     | 5.798  | 7.554  | -1.756 | 0.296 | 1 | 0.0969<br>2 | 0.429 |
| A_44_P429<br>453  | Lama5        | 8.965  | 9.946  | -0.981 | 0.506 | 1 | 0.0969<br>2 | 0.424 |
| A_44_P621<br>328  | A_44_P621328 | 12.704 | 13.946 | -1.242 | 0.423 | 1 | 0.0975      | 0.417 |
| A_44_P269<br>306  | Spp2         | 5.444  | 6.642  | -1.198 | 0.436 | 1 | 0.1002<br>4 | 0.39  |
| A_44_P199<br>469  | Gsdmcd1      | 10.579 | 11.609 | -1.031 | 0.49  | 1 | 0.1008<br>9 | 0.348 |
| A_44_P545<br>966  | LOC365476    | 6.805  | 8.57   | -1.764 | 0.294 | 1 | 0.1002<br>4 | 0.341 |
| A_44_P426<br>541  | Arhgap24     | 9.408  | 11.022 | -1.614 | 0.327 | 1 | 0.1032<br>3 | 0.333 |
| A_43_P110<br>55   | TC551244     | 9.997  | 10.968 | -0.971 | 0.51  | 1 | 0.1105<br>6 | 0.247 |
| A_44_P355<br>775  | BM390476     | 6.623  | 7.696  | -1.072 | 0.476 | 1 | 0.1105<br>6 | 0.241 |
| A_44_P131<br>046  | RGD1560105   | 14.782 | 15.655 | -0.873 | 0.546 | 1 | 0.1117<br>2 | 0.235 |
| A_44_P704<br>642  | TC550302     | 6.836  | 7.939  | -1.103 | 0.466 | 1 | 0.1114      | 0.235 |
| A_44_P259<br>138  | BI273834     | 5.471  | 6.201  | -0.731 | 0.603 | 1 | 0.1105<br>6 | 0.229 |
| A_44_P104<br>0494 | RGD1561530   | 6.898  | 8.29   | -1.392 | 0.381 | 1 | 0.1114<br>8 | 0.203 |
| A_42_P701<br>060  | Onecut1      | 5.453  | 6.714  | -1.26  | 0.417 | 1 | 0.1117<br>2 | 0.155 |
| A_42_P601<br>014  | LOC501065    | 9.852  | 10.938 | -1.086 | 0.471 | 1 | 0.1117<br>2 | 0.152 |
| A_44_P977<br>085  | LOC680885    | 6.947  | 8.644  | -1.697 | 0.308 | 1 | 0.1117<br>2 | 0.151 |
| A_44_P653<br>744  | RGD1561261   | 7.544  | 8.544  | -1     | 0.5   | 1 | 0.1137<br>3 | 0.126 |
| A_44_P695<br>277  | RGD1563276   | 10.665 | 11.568 | -0.902 | 0.535 | 1 | 0.1165<br>3 | 0.081 |
| A_44_P701<br>715  | TC564630     | 6.009  | 7.067  | -1.058 | 0.48  | 1 | 0.1196<br>3 | 0.059 |
| A_43_P124<br>02   | Slc27a5      | 8.013  | 9.225  | -1.212 | 0.432 | 1 | 0.1199<br>9 | 0.029 |
| A_44_P314<br>541  | AI227731     | 6.891  | 7.737  | -0.846 | 0.556 | 1 | 0.1199<br>9 | 0.028 |
| A_44_P549<br>075  | Pla2g5       | 6.575  | 8.683  | -2.108 | 0.232 | 1 | 0.1217<br>2 | 0.024 |
| A_43_P231<br>18   | Igfbpl1      | 7.127  | 9.191  | -2.064 | 0.239 | 1 | 0.1210<br>3 | 0.012 |
| A_44_P480<br>455  | Efs          | 10.841 | 11.9   | -1.059 | 0.48  | 1 | 0.1210<br>3 | 0.009 |



| skin               |            |                |                 |        |       |          |         |        |
|--------------------|------------|----------------|-----------------|--------|-------|----------|---------|--------|
| Agilent feature ID | ShortName  | Skin.DHT.ave A | Skin.Ctrl.ave A | M      | Fold  | AdjP     | FDR     | B      |
| A_44_P481160       | Wnt5a      | 6.81           | 10.901          | -4.091 | 0.059 | 1.00E-05 | 0       | 10.539 |
| A_44_P634470       | RGD1309969 | 7.751          | 9.044           | -1.293 | 0.408 | 0.03223  | 0.00403 | 5.745  |
| A_44_P466255       | LOC690517  | 9.009          | 10.377          | -1.368 | 0.387 | 0.04547  | 0.00455 | 5.447  |
| A_44_P791638       | TC519964   | 7.73           | 9.968           | -2.238 | 0.212 | 0.05699  | 0.00518 | 5.251  |
| A_44_P323971       | Ptch1      | 8.128          | 9.556           | -1.428 | 0.372 | 0.1096   | 0.00731 | 4.682  |
| A_44_P537480       | Cox6b2     | 8.651          | 10.494          | -1.844 | 0.279 | 0.16623  | 0.00978 | 4.311  |
| A_44_P359121       | Dcamk13    | 7.13           | 8.848           | -1.719 | 0.304 | 0.23898  | 0.01109 | 3.99   |
| A_44_P534089       | Ccnb1      | 9.331          | 11.681          | -2.349 | 0.196 | 0.22979  | 0.01109 | 3.98   |
| A_44_P400158       | Stk6       | 7.872          | 9.422           | -1.551 | 0.341 | 0.24856  | 0.01109 | 3.963  |
| A_44_P214811       | Tfrc       | 12.193         | 13.204          | -1.011 | 0.496 | 0.25019  | 0.01109 | 3.95   |
| A_44_P1023801      | Kif23      | 8.774          | 10.295          | -1.521 | 0.348 | 0.25499  | 0.01109 | 3.933  |
| A_44_P125710       | Pex2       | 6.232          | 8.082           | -1.85  | 0.277 | 0.27435  | 0.01144 | 3.868  |
| A_44_P133485       | LOC362564  | 7.718          | 9.299           | -1.58  | 0.334 | 0.35433  | 0.01316 | 3.641  |
| A_44_P373285       | BF555105   | 7.976          | 10.589          | -2.613 | 0.164 | 0.45484  | 0.01536 | 3.418  |
| A_44_P727508       | BF281819   | 10.222         | 11.554          | -1.331 | 0.397 | 0.46044  | 0.01536 | 3.417  |
| A_42_P478138       | AW913982   | 9.045          | 10.217          | -1.172 | 0.444 | 0.45612  | 0.01536 | 3.416  |
| A_42_P565275       | Aspm       | 9.37           | 11.911          | -2.541 | 0.172 | 0.59042  | 0.01846 | 3.119  |
| A_44_P297525       | LOC681050  | 8.102          | 9.14            | -1.038 | 0.487 | 0.89544  | 0.0235  | 2.813  |
| A_42_P556829       | Wif1       | 8.113          | 10.121          | -2.008 | 0.249 | 1        | 0.0235  | 2.729  |
| A_44_P405083       | Cacna1i    | 6.641          | 9.049           | -2.409 | 0.188 | 0.95098  | 0.0235  | 2.71   |
| A_44_P236588       | Trpm2      | 7.327          | 9.259           | -1.932 | 0.262 | 1        | 0.0235  | 2.705  |
| A_44_P183160       | RGD1305450 | 6.631          | 8.952           | -2.321 | 0.2   | 1        | 0.02535 | 2.616  |
| A_44_P254347       | AI178762   | 5.317          | 7.129           | -1.812 | 0.285 | 0.97027  | 0.0235  | 2.591  |
| A_44_P140645       | Wnt6       | 8.754          | 10.635          | -1.881 | 0.271 | 1        | 0.02773 | 2.496  |
| A_44_P142850       | RGD1304969 | 9.472          | 10.896          | -1.424 | 0.373 | 1        | 0.02969 | 2.415  |
| A_44_P247997       | Fancc      | 7.537          | 8.926           | -1.389 | 0.382 | 1        | 0.03013 | 2.357  |
| A_44_P825985       | RGD1563717 | 6.712          | 8.492           | -1.78  | 0.291 | 1        | 0.03107 | 2.269  |
| A_44_P370555       | RGD1562833 | 12.066         | 13.617          | -1.551 | 0.341 | 1        | 0.03107 | 2.259  |
| A_44_P100443       | Ung        | 7.785          | 9.258           | -1.473 | 0.36  | 1        | 0.03107 | 2.233  |
| A_44_P499271       | Asphd2     | 6.116          | 7.748           | -1.632 | 0.323 | 1        | 0.03141 | 2.207  |
| A_44_P217604       | Msh2       | 9.329          | 10.578          | -1.248 | 0.421 | 1        | 0.03217 | 2.182  |
| A_44_P623426       | LOC683109  | 7.652          | 8.843           | -1.191 | 0.438 | 1        | 0.03354 | 2.117  |
| A_44_P202988       | Odc1       | 11.18          | 12.244          | -1.064 | 0.478 | 1        | 0.03354 | 2.101  |
| A_44_P487112       | Wee1       | 9.746          | 11.045          | -1.299 | 0.406 | 1        | 0.03416 | 2.026  |
| A_44_P337699       | RGD1309007 | 7.977          | 9.527           | -1.55  | 0.342 | 1        | 0.03562 | 1.945  |
| A_44_P398060       | Nrcam      | 6.937          | 9.166           | -2.229 | 0.213 | 1        | 0.03582 | 1.927  |
| A_44_P493911       | Slc13a5    | 6.96           | 8.994           | -2.034 | 0.244 | 1        | 0.03611 | 1.906  |

|                   |              |        |        |        |       |   |         |       |
|-------------------|--------------|--------|--------|--------|-------|---|---------|-------|
| A_44_P416359      | AA899590     | 8.471  | 10.493 | -2.022 | 0.246 | 1 | 0.03615 | 1.879 |
| A_44_P283235      | S100vp       | 6.028  | 8.855  | -2.827 | 0.141 | 1 | 0.03695 | 1.833 |
| A_42_P812263      | Sat          | 11.266 | 13.248 | -1.981 | 0.253 | 1 | 0.03695 | 1.821 |
| A_44_P527300      | Tchp         | 7.287  | 8.213  | -0.925 | 0.527 | 1 | 0.03714 | 1.804 |
| A_44_P444363      | LOC304396    | 7.899  | 9.811  | -1.912 | 0.266 | 1 | 0.03714 | 1.792 |
| A_44_P621913      | BM392119     | 7.381  | 9.349  | -1.968 | 0.256 | 1 | 0.03815 | 1.744 |
| A_44_P180795      | RGD1306908   | 6.586  | 7.689  | -1.103 | 0.466 | 1 | 0.03893 | 1.691 |
| A_44_P112527      | RGD1563717   | 7.731  | 10.246 | -2.515 | 0.175 | 1 | 0.04005 | 1.655 |
| A_44_P548203      | Rbm3         | 11.71  | 13.354 | -1.644 | 0.32  | 1 | 0.03893 | 1.633 |
| A_44_P265359      | RGD1565726   | 6.517  | 7.665  | -1.148 | 0.451 | 1 | 0.04101 | 1.622 |
| A_44_P147285      | A_44_P147285 | 9.617  | 12.204 | -2.586 | 0.167 | 1 | 0.04141 | 1.607 |
| A_44_P885046      | TC524385     | 7.916  | 8.883  | -0.966 | 0.512 | 1 | 0.04141 | 1.554 |
| A_44_P299933      | LOC680089    | 7.747  | 9.297  | -1.55  | 0.342 | 1 | 0.04222 | 1.518 |
| A_43_P12665       | Mmp24        | 7.129  | 9.042  | -1.914 | 0.265 | 1 | 0.04222 | 1.5   |
| A_44_P309266      | Pbk          | 6.427  | 8.169  | -1.741 | 0.299 | 1 | 0.04222 | 1.466 |
| A_44_P400494      | Krt1-18      | 7.881  | 10.282 | -2.401 | 0.189 | 1 | 0.04425 | 1.443 |
| A_44_P377432      | LOC362068    | 6.393  | 7.575  | -1.182 | 0.441 | 1 | 0.04244 | 1.417 |
| A_44_P854356      | RGD1564108   | 7.334  | 9.055  | -1.72  | 0.303 | 1 | 0.04222 | 1.417 |
| A_44_P845409      | AW913993     | 8.846  | 11.289 | -2.444 | 0.184 | 1 | 0.04244 | 1.413 |
| A_44_P792409      | TC557492     | 7.223  | 8.332  | -1.109 | 0.464 | 1 | 0.04353 | 1.362 |
| A_44_P231303      | Sbp          | 5.922  | 9.081  | -3.159 | 0.112 | 1 | 0.04448 | 1.338 |
| A_44_P556579      | RGD1565596   | 7.437  | 8.336  | -0.9   | 0.536 | 1 | 0.04425 | 1.325 |
| A_44_P280963      | Kifc1        | 7.963  | 9.581  | -1.618 | 0.326 | 1 | 0.04425 | 1.304 |
| A_42_P575398      | Aadac        | 5.89   | 7.244  | -1.354 | 0.391 | 1 | 0.04426 | 1.296 |
| A_44_P322860      | Camkk1       | 9.267  | 10.583 | -1.316 | 0.402 | 1 | 0.04448 | 1.279 |
| A_44_P504289      | XM_220964    | 8.184  | 11.291 | -3.107 | 0.116 | 1 | 0.04477 | 1.248 |
| A_42_P821898      | RGD1561825   | 7.898  | 8.799  | -0.9   | 0.536 | 1 | 0.04599 | 1.181 |
| A_44_P184484      | Orc1l        | 7.893  | 8.969  | -1.075 | 0.475 | 1 | 0.04599 | 1.17  |
| A_44_P104271<br>1 | Kif20a       | 9.741  | 11.355 | -1.614 | 0.327 | 1 | 0.04634 | 1.148 |
| A_44_P237153      | Birc5        | 9.708  | 11.665 | -1.957 | 0.258 | 1 | 0.04634 | 1.141 |
| A_42_P756652      | RGD620382    | 11.914 | 13.237 | -1.324 | 0.4   | 1 | 0.04634 | 1.13  |
| A_44_P318707      | RGD1562948   | 7.376  | 8.751  | -1.375 | 0.385 | 1 | 0.04669 | 1.109 |
| A_44_P240461      | AA800571     | 7.371  | 8.584  | -1.212 | 0.432 | 1 | 0.04772 | 1.099 |
| A_44_P524326      | Racgap1      | 6.973  | 8.578  | -1.605 | 0.329 | 1 | 0.04964 | 1.039 |
| A_44_P480424      | Tigd3        | 6.558  | 7.439  | -0.881 | 0.543 | 1 | 0.04984 | 1.028 |
| A_44_P238978      | Ris2         | 7.094  | 8.222  | -1.128 | 0.458 | 1 | 0.05003 | 1.016 |
| A_44_P492533      | A_44_P492533 | 10.153 | 12.017 | -1.864 | 0.275 | 1 | 0.05003 | 1.004 |
| A_44_P461544      | Ccnb2        | 8.395  | 10.52  | -2.125 | 0.229 | 1 | 0.05194 | 0.957 |
| A_44_P102096<br>7 | LOC680537    | 8.358  | 9.541  | -1.184 | 0.44  | 1 | 0.05263 | 0.951 |
| A_44_P345081      | RGD1307309   | 7.204  | 8.382  | -1.179 | 0.442 | 1 | 0.05263 | 0.946 |
| A_44_P506017      | Hist1h2bn    | 12.6   | 13.641 | -1.041 | 0.486 | 1 | 0.05266 | 0.9   |

|               |            |        |        |        |       |   |         |       |
|---------------|------------|--------|--------|--------|-------|---|---------|-------|
| A_43_P22110   | Nfatc2ip   | 7.912  | 9.641  | -1.729 | 0.302 | 1 | 0.05266 | 0.898 |
| A_44_P541426  | Srms       | 6.392  | 7.492  | -1.1   | 0.466 | 1 | 0.05266 | 0.893 |
| A_44_P776915  | TC522458   | 8.992  | 9.96   | -0.968 | 0.511 | 1 | 0.05266 | 0.886 |
| A_44_P208552  | Il1f10     | 11.519 | 13.273 | -1.754 | 0.296 | 1 | 0.05266 | 0.88  |
| A_44_P130254  | Np4        | 10.209 | 11.371 | -1.162 | 0.447 | 1 | 0.05266 | 0.879 |
| A_44_P745749  | Mycn       | 9.461  | 11.99  | -2.529 | 0.173 | 1 | 0.05266 | 0.866 |
| A_44_P291175  | Kntc2      | 8.23   | 10.238 | -2.008 | 0.249 | 1 | 0.05266 | 0.864 |
| A_44_P744512  | Hist1h4a   | 11.956 | 13.508 | -1.552 | 0.341 | 1 | 0.05266 | 0.852 |
| A_42_P529711  | BF554994   | 9.778  | 10.909 | -1.131 | 0.457 | 1 | 0.05266 | 0.844 |
| A_44_P262662  | LOC295241  | 9.074  | 9.907  | -0.832 | 0.562 | 1 | 0.05266 | 0.826 |
| A_44_P467198  | E2f7       | 5.194  | 6.083  | -0.889 | 0.54  | 1 | 0.05266 | 0.826 |
| A_44_P590086  | BG667093   | 6.877  | 7.968  | -1.091 | 0.47  | 1 | 0.05266 | 0.823 |
| A_44_P328008  | Aix3       | 7.131  | 8.637  | -1.507 | 0.352 | 1 | 0.05268 | 0.814 |
| A_44_P253108  | Spbc25     | 7.697  | 9.272  | -1.576 | 0.336 | 1 | 0.05267 | 0.813 |
| A_44_P1049827 | Nsg1       | 7.192  | 9.024  | -1.832 | 0.281 | 1 | 0.05301 | 0.793 |
| A_43_P22478   | Dyrk3      | 6.625  | 7.644  | -1.019 | 0.494 | 1 | 0.05301 | 0.79  |
| A_44_P1054991 | Gli1       | 9.043  | 10.93  | -1.888 | 0.27  | 1 | 0.05301 | 0.784 |
| A_44_P223446  | Mcm2       | 7.311  | 8.433  | -1.122 | 0.46  | 1 | 0.05338 | 0.767 |
| A_44_P482271  | Scgb1d2    | 6.503  | 9.76   | -3.256 | 0.105 | 1 | 0.0539  | 0.753 |
| A_44_P231935  | RGD1563603 | 6.233  | 7.629  | -1.395 | 0.38  | 1 | 0.0539  | 0.749 |
| A_44_P720741  | CV797251   | 6.346  | 7.421  | -1.075 | 0.475 | 1 | 0.05547 | 0.724 |
| A_44_P542910  | Golga7     | 9.582  | 10.55  | -0.967 | 0.511 | 1 | 0.05605 | 0.687 |
| A_44_P807734  | BP504238   | 8.433  | 9.537  | -1.104 | 0.465 | 1 | 0.05632 | 0.642 |
| A_44_P828432  | CN382817   | 5.619  | 7.296  | -1.677 | 0.313 | 1 | 0.05632 | 0.632 |
| A_43_P18241   | XM_224859  | 7.915  | 9.625  | -1.711 | 0.306 | 1 | 0.05632 | 0.63  |
| A_44_P532473  | Traip      | 6.601  | 7.514  | -0.913 | 0.531 | 1 | 0.05632 | 0.621 |
| A_44_P434098  | Tpsd1      | 5.451  | 6.492  | -1.041 | 0.486 | 1 | 0.05632 | 0.619 |
| A_44_P281035  | Uchl1      | 7.763  | 9.855  | -2.092 | 0.235 | 1 | 0.05814 | 0.574 |
| A_43_P13069   | Chek1      | 6.97   | 8.266  | -1.296 | 0.407 | 1 | 0.0588  | 0.568 |
| A_44_P541746  | AA962967   | 7.05   | 8.457  | -1.407 | 0.377 | 1 | 0.0588  | 0.558 |
| A_44_P809199  | TC528809   | 5.544  | 7.28   | -1.736 | 0.3   | 1 | 0.05931 | 0.541 |
| A_44_P1005213 | Cdca1      | 8.58   | 10.511 | -1.931 | 0.262 | 1 | 0.05975 | 0.524 |
| A_42_P511410  | Gripap1    | 10.96  | 12.08  | -1.12  | 0.46  | 1 | 0.05632 | 0.512 |
| A_44_P804257  | Trim37     | 7.91   | 8.845  | -0.935 | 0.523 | 1 | 0.06061 | 0.496 |
| A_44_P584408  | TC541474   | 5.811  | 7.446  | -1.635 | 0.322 | 1 | 0.06075 | 0.495 |
| A_44_P401161  | RGD1565395 | 12.353 | 13.82  | -1.467 | 0.362 | 1 | 0.06061 | 0.49  |
| A_43_P14506   | LOC499506  | 6.599  | 8.073  | -1.474 | 0.36  | 1 | 0.06075 | 0.481 |
| A_44_P1019291 | Dleu7      | 5.708  | 6.617  | -0.91  | 0.532 | 1 | 0.06075 | 0.463 |
| A_42_P626008  | Traf4af1   | 7.645  | 9.207  | -1.562 | 0.339 | 1 | 0.06075 | 0.462 |
| A_44_P792703  | TC524443   | 6.58   | 7.988  | -1.408 | 0.377 | 1 | 0.06075 | 0.452 |



|                   |              |        |        |        |       |   |         |       |
|-------------------|--------------|--------|--------|--------|-------|---|---------|-------|
| A_44_P242756      | Pcna         | 9.34   | 10.662 | -1.321 | 0.4   | 1 | 0.06075 | 0.436 |
| A_44_P880441      | AW921293     | 6.887  | 8.792  | -1.905 | 0.267 | 1 | 0.06075 | 0.436 |
| A_44_P208849      | Dnalc4       | 7.168  | 8.019  | -0.851 | 0.555 | 1 | 0.06085 | 0.427 |
| A_43_P12635       | P2ry4        | 8.612  | 11.377 | -2.765 | 0.147 | 1 | 0.06085 | 0.417 |
| A_44_P196217      | Gpr37        | 8.217  | 9.638  | -1.421 | 0.374 | 1 | 0.06085 | 0.407 |
| A_43_P23164       | Slc22a13     | 11.489 | 14.028 | -2.539 | 0.172 | 1 | 0.06085 | 0.4   |
| A_43_P22996       | RGD1307679   | 7.853  | 9.181  | -1.328 | 0.398 | 1 | 0.06085 | 0.395 |
| A_44_P126868      | Fkbp1b       | 6.701  | 7.841  | -1.14  | 0.454 | 1 | 0.06085 | 0.394 |
| A_44_P698293      | RGD1564720   | 14.461 | 17.305 | -2.844 | 0.139 | 1 | 0.06085 | 0.393 |
| A_44_P367926      | XM_213990    | 9.003  | 10.242 | -1.239 | 0.424 | 1 | 0.06085 | 0.386 |
| A_44_P223358      | BF555594     | 8.344  | 9.695  | -1.351 | 0.392 | 1 | 0.06085 | 0.372 |
| A_43_P15557       | Pter         | 7.269  | 8.222  | -0.954 | 0.516 | 1 | 0.06085 | 0.369 |
| A_44_P480865      | Nudt16       | 8.254  | 8.977  | -0.723 | 0.606 | 1 | 0.06085 | 0.368 |
| A_44_P171427      | RGD1310376   | 7.833  | 9.29   | -1.458 | 0.364 | 1 | 0.06085 | 0.366 |
| A_44_P751258      | Cdc2a        | 6.503  | 7.879  | -1.376 | 0.385 | 1 | 0.06085 | 0.365 |
| A_44_P432388      | Tdh          | 8.135  | 10.316 | -2.18  | 0.221 | 1 | 0.06085 | 0.351 |
| A_42_P594008      | Eif2b3       | 10.122 | 11.034 | -0.912 | 0.532 | 1 | 0.06085 | 0.349 |
| A_43_P18802       | Pask         | 6.2    | 7.191  | -0.99  | 0.503 | 1 | 0.06085 | 0.346 |
| A_44_P262102      | Pafah1b3     | 9.434  | 10.313 | -0.88  | 0.544 | 1 | 0.06085 | 0.332 |
| A_44_P130992      | RGD1307418   | 6.287  | 7.392  | -1.105 | 0.465 | 1 | 0.06085 | 0.327 |
| A_44_P100334<br>3 | LOC362994    | 8.511  | 9.49   | -0.979 | 0.507 | 1 | 0.06085 | 0.322 |
| A_42_P693096      | AI454457     | 7.324  | 9.186  | -1.862 | 0.275 | 1 | 0.06085 | 0.321 |
| A_44_P962896      | TC564051     | 11.892 | 13.237 | -1.345 | 0.394 | 1 | 0.06085 | 0.309 |
| A_43_P15962       | Ccna2        | 6.929  | 8.252  | -1.322 | 0.4   | 1 | 0.06085 | 0.308 |
| A_44_P102477<br>3 | RGD1561749   | 8.924  | 10.616 | -1.692 | 0.309 | 1 | 0.06085 | 0.304 |
| A_44_P480285      | Kif2c        | 6.862  | 7.982  | -1.12  | 0.46  | 1 | 0.06085 | 0.284 |
| A_44_P367680      | Odf2         | 8.831  | 9.546  | -0.715 | 0.609 | 1 | 0.06085 | 0.273 |
| A_44_P883226      | A_44_P883226 | 6.887  | 7.739  | -0.852 | 0.554 | 1 | 0.06085 | 0.258 |
| A_44_P533786      | Aurkb        | 6.483  | 8.564  | -2.08  | 0.236 | 1 | 0.06085 | 0.256 |
| A_44_P522461      | Olr1229      | 10.402 | 12.961 | -2.56  | 0.17  | 1 | 0.06085 | 0.255 |
| A_44_P655718      | LOC681949    | 6.445  | 7.559  | -1.114 | 0.462 | 1 | 0.06085 | 0.254 |
| A_44_P267128      | Tmpo         | 9.558  | 10.44  | -0.882 | 0.543 | 1 | 0.06085 | 0.25  |
| A_43_P16067       | Kif11        | 7.082  | 8.157  | -1.075 | 0.475 | 1 | 0.06085 | 0.244 |
| A_44_P544088      | Ka26         | 9.683  | 12.246 | -2.563 | 0.169 | 1 | 0.06085 | 0.243 |
| A_44_P792495      | TC524051     | 10.53  | 11.445 | -0.914 | 0.531 | 1 | 0.06085 | 0.242 |
| A_43_P13882       | Rhag         | 5.247  | 6.615  | -1.368 | 0.387 | 1 | 0.06085 | 0.236 |
| A_44_P442695      | Olr721       | 8.193  | 10.8   | -2.607 | 0.164 | 1 | 0.06103 | 0.23  |
| A_44_P114729      | RGD1308048   | 9.553  | 10.534 | -0.98  | 0.507 | 1 | 0.06129 | 0.222 |
| A_42_P744033      | RGD1305958   | 8.144  | 9.585  | -1.441 | 0.368 | 1 | 0.06139 | 0.217 |
| A_43_P13103       | Dhfr         | 9.915  | 11.247 | -1.333 | 0.397 | 1 | 0.06165 | 0.203 |
| A_44_P351898      | Mad2l1       | 8.64   | 10.243 | -1.602 | 0.329 | 1 | 0.06165 | 0.202 |

|               |              |        |        |        |          |         |          |        |
|---------------|--------------|--------|--------|--------|----------|---------|----------|--------|
| A_44_P545193  | Hsd11b2      | 8.21   | 10.058 | -1.848 | 0.278    | 1       | 0.06165  | 0.194  |
| A_44_P524321  | Racgap1      | 8.818  | 10.782 | -1.963 | 0.256    | 1       | 0.06165  | 0.194  |
| A_44_P180147  | Sap2         | 8.55   | 9.754  | -1.204 | 0.434    | 1       | 0.06165  | 0.19   |
| A_44_P204710  | Mcpt8l3      | 6.054  | 6.873  | -0.819 | 0.567    | 1       | 0.06165  | 0.182  |
| A_44_P283561  | Mgst1        | 11.858 | 12.974 | -1.116 | 0.461    | 1       | 0.06165  | 0.18   |
| A_44_P220325  | Dynlrb2      | 6.718  | 8.178  | -1.46  | 0.363    | 1       | 0.06165  | 0.178  |
| A_42_P460758  | BF412134     | 9.454  | 11.781 | -2.327 | 0.199    | 1       | 0.06165  | 0.176  |
| A_44_P910050  | AW914464     | 5.283  | 6.345  | -1.062 | 0.479    | 1       | 0.06191  | 0.152  |
| A_44_P132533  | Rfc4         | 9.898  | 10.89  | -0.992 | 0.503    | 1       | 0.06236  | 0.142  |
| A_44_P321009  | Cyp1a1       | 6.695  | 8.292  | -1.597 | 0.331    | 1       | 0.06311  | 0.139  |
| A_44_P975471  | RGD1560398   | 8.835  | 9.796  | -0.961 | 0.514    | 1       | 0.06311  | 0.125  |
| A_44_P518500  | Racgap1      | 8.358  | 10.137 | -1.78  | 0.291    | 1       | 0.06311  | 0.125  |
| A_44_P349831  | RGD1311234   | 7.973  | 10.275 | -2.302 | 0.203    | 1       | 0.06311  | 0.11   |
| A_44_P309584  | RGD1306228   | 10.308 | 11.352 | -1.044 | 0.485    | 1       | 0.06311  | 0.108  |
| A_44_P975167  | Hist1h2an    | 12.296 | 13.805 | -1.51  | 0.351    | 1       | 0.06329  | 0.101  |
| A_44_P869382  | TC541426     | 10.683 | 11.539 | -0.856 | 0.552    | 1       | 0.06329  | 0.099  |
| A_44_P553480  | XM_346087    | 6.277  | 7.452  | -1.175 | 0.443    | 1       | 0.06384  | 0.087  |
| A_44_P511299  | Tmem53       | 9.636  | 10.421 | -0.785 | 0.58     | 1       | 0.06384  | 0.086  |
| A_43_P19284   | Bcar3        | 6.913  | 7.658  | -0.745 | 0.597    | 1       | 0.06384  | 0.084  |
| A_43_P12888   | Pafah1b3     | 10.304 | 11.244 | -0.94  | 0.521    | 1       | 0.06384  | 0.077  |
| A_44_P166495  | Rangap1      | 9.64   | 10.634 | -0.994 | 0.502    | 1       | 0.06384  | 0.071  |
| A_44_P778242  | TC544427     | 5.156  | 5.873  | -0.717 | 0.608    | 1       | 0.06384  | 0.069  |
| A_44_P226263  | LOC687595    | 10.634 | 11.862 | -1.227 | 0.427    | 1       | 0.06384  | 0.065  |
| A_44_P849825  | BF289667     | 5.141  | 5.86   | -0.719 | 0.607    | 1       | 0.06384  | 0.056  |
| A_44_P546123  | Mcm5         | 6.779  | 8.085  | -1.306 | 0.404    | 1       | 0.06384  | 0.051  |
| A_44_P325479  | Ccnb1        | 7.001  | 8.793  | -1.792 | 0.289    | 1       | 0.06384  | 0.049  |
| A_44_P418920  | AI231821     | 7.416  | 8.455  | -1.04  | 0.486    | 1       | 0.06384  | 0.047  |
| A_44_P480379  | RGD1564165   | 6.754  | 7.844  | -1.091 | 0.47     | 1       | 0.06384  | 0.03   |
| A_44_P482294  | Dck          | 6.504  | 7.688  | -1.183 | 0.44     | 1       | 0.06384  | 0.025  |
| A_44_P945616  | Wnt5b        | 9.732  | 10.59  | -0.858 | 0.552    | 1       | 0.06384  | 0.022  |
| A_44_P669716  | TC525753     | 5.602  | 6.5    | -0.898 | 0.537    | 1       | 0.06384  | 0.022  |
| A_44_P309081  | Hspa2        | 10.233 | 11.414 | -1.181 | 0.441    | 1       | 0.06384  | 0.021  |
| A_44_P562314  | TC524618     | 10.273 | 11.164 | -0.891 | 0.539    | 1       | 0.0641   | 0.02   |
| A_44_P107634  | RGD1305288   | 8.456  | 9.748  | -1.292 | 0.408    | 1       | 0.06384  | 0.019  |
| A_44_P220305  | Hnrpa2b1     | 10.755 | 11.565 | -0.81  | 0.57     | 1       | 0.06384  | 0.016  |
| A_44_P276338  | Mcm6         | 7.989  | 9.637  | -1.648 | 0.319    | 1       | 0.06384  | 0.016  |
| A_44_P913781  | A_44_P913781 | 8.04   | 8.958  | -0.918 | 0.529    | 1       | 0.06384  | 0.008  |
| A_44_P1033595 | RGD1309871   | 9.19   | 10.393 | -1.203 | 0.434    | 1       | 0.06384  | 0.006  |
| A_44_P577090  | TC558454     | 9.428  | 11.123 | -1.695 | 0.309    | 1       | 0.0641   | 0.003  |
| A_42_P604382  | RGD1561064   | 17.173 | 7.13   | 10.043 | 1055.025 | 0       | 0        | 16.909 |
| A_44_P231269  | Pdk4         | 10.412 | 7.163  | 3.249  | 9.508    | 0.00022 | 7.00E-05 | 9.868  |

|              |                   |        |        |       |        |         |          |       |
|--------------|-------------------|--------|--------|-------|--------|---------|----------|-------|
| A_44_P107000 | Schip1            | 9.412  | 6.933  | 2.479 | 5.575  | 0.00041 | 1.00E-04 | 8.534 |
| A_44_P505440 | CB327764          | 10.812 | 8.999  | 1.812 | 3.512  | 0.00136 | 0.00027  | 8.418 |
| A_43_P18969  | Fkbp5             | 10.272 | 8.691  | 1.581 | 2.992  | 0.0036  | 6.00E-04 | 7.61  |
| A_44_P552460 | RGD1310754        | 8.482  | 6.322  | 2.16  | 4.469  | 0.00924 | 0.00132  | 6.802 |
| A_44_P132160 | Csrp3             | 9.23   | 6.723  | 2.508 | 5.687  | 0.03981 | 0.00442  | 5.562 |
| A_44_P637687 | RGD1310754        | 8.311  | 6.074  | 2.237 | 4.715  | 0.06611 | 0.00551  | 5.121 |
| A_42_P688604 | Ces1<br>LOC683107 | 9.412  | 7.06   | 2.351 | 5.103  | 0.07272 | 0.0056   | 5.038 |
| A_43_P17457  | Cd163             | 10.115 | 8.552  | 1.562 | 2.953  | 0.08275 | 0.00591  | 4.925 |
| A_44_P759216 | AI009709          | 9.061  | 6.859  | 2.203 | 4.604  | 0.11931 | 0.00746  | 4.607 |
| A_42_P736573 | AI031053          | 13.48  | 10.287 | 3.192 | 9.142  | 0.21486 | 0.01109  | 4.085 |
| A_42_P795688 | RGD1305703        | 12.458 | 10.474 | 1.984 | 3.956  | 0.35289 | 0.01316  | 3.606 |
| A_44_P262593 | Ankrd2            | 11.832 | 7.444  | 4.388 | 20.935 | 0.35505 | 0.01316  | 3.498 |
| A_44_P141051 | Colq              | 8.055  | 6.654  | 1.401 | 2.64   | 0.55354 | 0.01787  | 3.243 |
| A_44_P142837 | Cmya1             | 9.352  | 6.824  | 2.528 | 5.768  | 0.6263  | 0.0188   | 3.133 |
| A_44_P803553 | AI102989          | 9.433  | 8.107  | 1.326 | 2.507  | 0.63884 | 0.0188   | 3.125 |
| A_44_P719043 | RGD1561256        | 9.72   | 8.835  | 0.884 | 1.846  | 0.68189 | 0.0195   | 3.057 |
| A_44_P339757 | AF050661          | 7.243  | 5.59   | 1.653 | 3.145  | 0.71604 | 0.01991  | 2.844 |
| A_43_P12586  | Ptgis             | 10.416 | 7.858  | 2.558 | 5.889  | 0.92078 | 0.0235   | 2.799 |
| A_42_P577445 | LOC364802         | 12.423 | 11.291 | 1.132 | 2.192  | 0.95339 | 0.0235   | 2.735 |
| A_44_P498937 | Hspb7             | 8.055  | 6.373  | 1.682 | 3.21   | 1       | 0.02539  | 2.595 |
| A_42_P768978 | Nrp1              | 10.012 | 8.995  | 1.017 | 2.023  | 1       | 0.03013  | 2.357 |
| A_44_P311324 | Cyp2b2            | 8.691  | 7.01   | 1.681 | 3.207  | 1       | 0.03013  | 2.346 |
| A_44_P366142 | Zbtb16            | 9.372  | 7.807  | 1.565 | 2.96   | 1       | 0.03107  | 2.239 |
| A_43_P18491  | Map2k7            | 8.335  | 6.885  | 1.45  | 2.732  | 1       | 0.03107  | 2.152 |
| A_44_P808807 | Lrrc23            | 9.064  | 7.019  | 2.045 | 4.126  | 1       | 0.03368  | 2.082 |
| A_43_P15597  | Steap3            | 8.382  | 7.335  | 1.047 | 2.066  | 1       | 0.03403  | 2.058 |
| A_44_P133618 | RGD1561425        | 9.621  | 6.941  | 2.68  | 6.408  | 1       | 0.03416  | 2.025 |
| A_42_P577677 | Tnni1             | 12.693 | 9.269  | 3.424 | 10.735 | 1       | 0.03562  | 1.962 |
| A_42_P489681 | BC085903          | 12.28  | 11.234 | 1.046 | 2.065  | 1       | 0.03562  | 1.961 |
| A_43_P19799  | RGD1563222        | 7.822  | 6.824  | 0.998 | 1.997  | 1       | 0.03615  | 1.899 |
| A_42_P572258 | AW920282          | 10.361 | 8.514  | 1.847 | 3.598  | 1       | 0.03695  | 1.847 |
| A_44_P194939 | BF548548          | 12.745 | 11.397 | 1.348 | 2.546  | 1       | 0.03815  | 1.761 |
| A_44_P388842 | Tssk1             | 7.727  | 6.775  | 0.952 | 1.935  | 1       | 0.03893  | 1.693 |
| A_44_P428854 | LOC685222         | 10.311 | 8.65   | 1.661 | 3.162  | 1       | 0.04104  | 1.61  |
| A_44_P550490 | Grem1             | 9.543  | 8.24   | 1.303 | 2.467  | 1       | 0.04115  | 1.607 |
| A_44_P839849 | TC545623          | 12.012 | 10.522 | 1.49  | 2.808  | 1       | 0.04141  | 1.55  |
| A_44_P529986 | LOC690211         | 10.089 | 8.827  | 1.263 | 2.4    | 1       | 0.04141  | 1.549 |
| A_43_P11055  | TC551244          | 11.473 | 10.484 | 0.989 | 1.985  | 1       | 0.04222  | 1.513 |
| A_44_P187751 | LOC363153         | 6.63   | 5.638  | 0.992 | 1.988  | 1       | 0.04222  | 1.489 |
| A_44_P928190 | RGD1561961        | 12.575 | 10.859 | 1.715 | 3.284  | 1       | 0.04222  | 1.482 |
| A_44_P234362 | Tmem43            | 10.446 | 8.925  | 1.521 | 2.869  | 1       | 0.04244  | 1.441 |

|                   |              |        |        |       |        |   |         |       |
|-------------------|--------------|--------|--------|-------|--------|---|---------|-------|
| A_44_P385633      | Cand1        | 10.399 | 8.869  | 1.53  | 2.888  | 1 | 0.04244 | 1.434 |
| A_44_P123742      | RGD1564265   | 7.459  | 5.845  | 1.614 | 3.061  | 1 | 0.04244 | 1.429 |
| A_44_P365286      | Aldh1a1      | 11.547 | 9.798  | 1.749 | 3.362  | 1 | 0.04255 | 1.394 |
| A_44_P763434      | RGD1560005   | 9.292  | 7.884  | 1.408 | 2.654  | 1 | 0.04255 | 1.391 |
| A_44_P812772      | AA964296     | 6.938  | 5.527  | 1.411 | 2.659  | 1 | 0.04403 | 1.343 |
| A_44_P104756      | Olr1303      | 9.181  | 7.697  | 1.484 | 2.797  | 1 | 0.04425 | 1.331 |
| A_44_P179956      | Igtp         | 8.179  | 6.961  | 1.218 | 2.326  | 1 | 0.04634 | 1.253 |
| A_44_P100178<br>2 | Myf6         | 11.232 | 7.563  | 3.668 | 12.714 | 1 | 0.04477 | 1.246 |
| A_44_P854339      | TC541862     | 10.916 | 9.364  | 1.552 | 2.931  | 1 | 0.04567 | 1.219 |
| A_43_P20759       | Lama2        | 11.349 | 10.312 | 1.038 | 2.053  | 1 | 0.04585 | 1.207 |
| A_44_P174181      | Cr16         | 7.887  | 6.324  | 1.563 | 2.955  | 1 | 0.04599 | 1.191 |
| A_44_P487930      | BE112513     | 11.362 | 10.162 | 1.201 | 2.299  | 1 | 0.04599 | 1.19  |
| A_44_P345972      | Phyh         | 7.592  | 5.54   | 2.053 | 4.148  | 1 | 0.04477 | 1.187 |
| A_44_P330760      | A_44_P330760 | 7.678  | 6.624  | 1.055 | 2.077  | 1 | 0.04599 | 1.178 |
| A_44_P397163      | Mlc2         | 11.368 | 7.449  | 3.919 | 15.131 | 1 | 0.04649 | 1.12  |
| A_44_P105733<br>1 | Lyk4         | 11.688 | 10.556 | 1.132 | 2.192  | 1 | 0.05003 | 1.011 |
| A_43_P11792       | Sod2         | 11.657 | 10.411 | 1.246 | 2.371  | 1 | 0.05032 | 1.007 |
| A_44_P116875      | LOC368158    | 8.599  | 7.56   | 1.039 | 2.055  | 1 | 0.05266 | 0.897 |
| A_44_P393580      | Mbc2         | 10.637 | 9.794  | 0.844 | 1.795  | 1 | 0.05266 | 0.897 |
| A_44_P138167      | Uap1         | 10.68  | 9.763  | 0.916 | 1.887  | 1 | 0.05266 | 0.895 |
| A_44_P747024      | TC526537     | 7.281  | 6.373  | 0.907 | 1.876  | 1 | 0.05266 | 0.862 |
| A_44_P103338<br>5 | Ag1          | 14.532 | 12.455 | 2.077 | 4.218  | 1 | 0.05266 | 0.855 |
| A_43_P23473       | XM_231034    | 7.511  | 5.471  | 2.04  | 4.112  | 1 | 0.05301 | 0.798 |
| A_44_P281868      | Cabc1        | 9.701  | 7.906  | 1.795 | 3.47   | 1 | 0.05301 | 0.781 |
| A_44_P880146      | BG666928     | 9.019  | 8.053  | 0.966 | 1.953  | 1 | 0.05301 | 0.769 |
| A_44_P517115      | AA859373     | 8.542  | 6.355  | 2.187 | 4.555  | 1 | 0.05338 | 0.75  |
| A_43_P17221       | Myoz2        | 11.582 | 8.306  | 3.277 | 9.691  | 1 | 0.05482 | 0.709 |
| A_44_P899333      | TC555395     | 12.876 | 11.757 | 1.119 | 2.172  | 1 | 0.05632 | 0.698 |
| A_42_P577938      | RGD1310450   | 7.896  | 6.887  | 1.008 | 2.011  | 1 | 0.05632 | 0.656 |
| A_44_P259947      | Kcnma1       | 7.295  | 6.277  | 1.019 | 2.026  | 1 | 0.05632 | 0.653 |
| A_44_P453998      | BM384453     | 7.178  | 6.396  | 0.782 | 1.719  | 1 | 0.05632 | 0.632 |
| A_43_P15812       | Hspb7        | 8.648  | 6.959  | 1.689 | 3.224  | 1 | 0.05632 | 0.619 |
| A_44_P101708      | AW434670     | 8.453  | 6.666  | 1.787 | 3.452  | 1 | 0.05668 | 0.607 |
| A_44_P883718      | RGD1560139   | 8.244  | 7.397  | 0.847 | 1.799  | 1 | 0.05811 | 0.579 |
| A_44_P321745      | BE113943     | 6.798  | 5.943  | 0.855 | 1.809  | 1 | 0.05975 | 0.528 |
| A_44_P315106      | Cfl2         | 10.346 | 8.103  | 2.243 | 4.734  | 1 | 0.06061 | 0.501 |
| A_44_P759995      | LOC683447    | 9.673  | 7.811  | 1.862 | 3.636  | 1 | 0.06061 | 0.488 |
| A_44_P179608      | AW527535     | 6.647  | 5.608  | 1.039 | 2.055  | 1 | 0.06061 | 0.488 |
| A_44_P188441      | Myl3         | 13.789 | 9.131  | 4.658 | 25.244 | 1 | 0.06075 | 0.468 |
| A_44_P642243      | TC565802     | 6.463  | 5.441  | 1.022 | 2.031  | 1 | 0.06075 | 0.453 |
| A_44_P282108      | BI288131     | 8.869  | 7.81   | 1.059 | 2.084  | 1 | 0.06075 | 0.446 |

|               |              |        |        |       |        |   |         |       |
|---------------|--------------|--------|--------|-------|--------|---|---------|-------|
| A_44_P993370  | Plekhc1      | 10.621 | 9.478  | 1.142 | 2.207  | 1 | 0.06075 | 0.44  |
| A_44_P313558  | Ppm1e        | 6.766  | 5.933  | 0.833 | 1.781  | 1 | 0.06085 | 0.417 |
| A_43_P21925   | Mll2         | 8.913  | 7.48   | 1.434 | 2.701  | 1 | 0.06085 | 0.399 |
| A_44_P624710  | TC547881     | 10.326 | 9.244  | 1.082 | 2.117  | 1 | 0.06085 | 0.392 |
| A_44_P155549  | XM_345136    | 12.11  | 8.431  | 3.679 | 12.806 | 1 | 0.06085 | 0.356 |
| A_44_P177807  | Epas1        | 11.779 | 10.62  | 1.158 | 2.232  | 1 | 0.06085 | 0.354 |
| A_44_P144988  | RGD1309807   | 10.497 | 9.484  | 1.014 | 2.019  | 1 | 0.06085 | 0.341 |
| A_44_P132065  | AW918597     | 11.991 | 9.483  | 2.508 | 5.687  | 1 | 0.06085 | 0.331 |
| A_43_P12020   | Kcnn3        | 7.837  | 6.963  | 0.873 | 1.832  | 1 | 0.06085 | 0.307 |
| A_44_P468331  | Rps6ka2      | 8.006  | 6.561  | 1.445 | 2.723  | 1 | 0.06085 | 0.306 |
| A_44_P869444  | TC540890     | 10.356 | 9.448  | 0.908 | 1.876  | 1 | 0.06085 | 0.299 |
| A_44_P1035058 | Entpd1       | 11.14  | 10.127 | 1.014 | 2.019  | 1 | 0.06085 | 0.297 |
| A_43_P12533   | Tgfb2        | 9.798  | 8.871  | 0.928 | 1.902  | 1 | 0.06085 | 0.289 |
| A_44_P353978  | XM_345064    | 9.108  | 8.226  | 0.881 | 1.842  | 1 | 0.06085 | 0.282 |
| A_44_P281266  | XM_226750    | 5.82   | 4.876  | 0.944 | 1.924  | 1 | 0.06085 | 0.268 |
| A_43_P16282   | Dmd          | 8.503  | 6.808  | 1.695 | 3.238  | 1 | 0.06085 | 0.259 |
| A_42_P503281  | Clic5        | 12.659 | 10.456 | 2.204 | 4.607  | 1 | 0.06085 | 0.253 |
| A_42_P504926  | BX883044     | 9.93   | 8.711  | 1.219 | 2.329  | 1 | 0.06191 | 0.197 |
| A_44_P245968  | XM_342444    | 8.006  | 6.805  | 1.201 | 2.299  | 1 | 0.06165 | 0.193 |
| A_44_P729822  | TC555357     | 11.152 | 10.368 | 0.784 | 1.722  | 1 | 0.06176 | 0.182 |
| A_42_P583245  | RGD1561141   | 14.576 | 13.384 | 1.192 | 2.284  | 1 | 0.06165 | 0.181 |
| A_44_P1043506 | LOC686547    | 10.493 | 9.687  | 0.806 | 1.748  | 1 | 0.06169 | 0.172 |
| A_44_P731205  | TC540864     | 10.752 | 9.059  | 1.693 | 3.234  | 1 | 0.0618  | 0.163 |
| A_44_P257112  | AA924926     | 6.669  | 5.783  | 0.886 | 1.848  | 1 | 0.06191 | 0.156 |
| A_44_P473565  | Usp24        | 8.828  | 7.639  | 1.189 | 2.28   | 1 | 0.06311 | 0.122 |
| A_42_P686078  | AW143067     | 13.637 | 12     | 1.637 | 3.109  | 1 | 0.06311 | 0.112 |
| A_44_P204204  | A_44_P204204 | 6.887  | 5.922  | 0.965 | 1.952  | 1 | 0.06384 | 0.106 |
| A_44_P214922  | Vldlr        | 8.741  | 7.303  | 1.437 | 2.708  | 1 | 0.06384 | 0.07  |
| A_44_P993328  | Ms4a11       | 10.249 | 8.321  | 1.928 | 3.804  | 1 | 0.06384 | 0.069 |
| A_44_P458704  | Glul         | 12.714 | 11.894 | 0.82  | 1.766  | 1 | 0.06384 | 0.062 |
| A_43_P15245   | Npr1         | 13.225 | 12.318 | 0.908 | 1.876  | 1 | 0.06384 | 0.038 |
| A_44_P297633  | Irx3         | 10.729 | 9.524  | 1.205 | 2.306  | 1 | 0.06384 | 0.022 |
| A_44_P331706  | Dnajb5       | 10.006 | 8.44   | 1.566 | 2.961  | 1 | 0.06384 | 0.008 |

| prostate          |            |                    |                     |       |        |              |              |        |
|-------------------|------------|--------------------|---------------------|-------|--------|--------------|--------------|--------|
| ID                | ShortName  | Prost.DHT.a<br>veA | Prost.Ctrl.a<br>veA | M     | Fold   | AdjP         | FDR          | B      |
| A_44_P3283<br>80  | XM_224105  | 12.01              | 7.224               | 4.786 | 27.597 | 0            | 0            | 15.553 |
| A_44_P4476<br>95  | Pbsn       | 11.839             | 7.063               | 4.776 | 27.404 | 0            | 0            | 18.539 |
| A_44_P2927<br>11  | Slc5a11    | 10.927             | 6.315               | 4.612 | 24.454 | 0.0012       | 2.00E-<br>05 | 9.199  |
| A_44_P1007<br>515 | Lyzl6      | 12.122             | 7.942               | 4.179 | 18.119 | 0            | 0            | 19.748 |
| A_44_P3283<br>86  | LOC691130  | 12.179             | 8.217               | 3.962 | 15.583 | 0.9157       | 0.0024<br>3  | 2.772  |
| A_44_P5485<br>59  | LOC690315  | 12.14              | 8.283               | 3.857 | 14.489 | 0            | 0            | 15.901 |
| A_44_P1008<br>867 | Neto2      | 10.629             | 6.849               | 3.78  | 13.735 | 0.0001<br>5  | 0            | 11.155 |
| A_44_P3126<br>05  | Smarcb1    | 13.692             | 9.938               | 3.754 | 13.493 | 4.00E-<br>05 | 0            | 12.253 |
| A_44_P3559<br>07  | Abo        | 12.765             | 9.049               | 3.716 | 13.142 | 0            | 0            | 14.824 |
| A_44_P9458<br>40  | Neto2      | 11.09              | 7.437               | 3.653 | 12.581 | 0            | 0            | 18.083 |
| A_44_P7799<br>71  | BF523525   | 11.363             | 7.714               | 3.649 | 12.541 | 0.0029<br>2  | 3.00E-<br>05 | 8.351  |
| A_44_P3126<br>06  | Smarcb1    | 10.727             | 7.183               | 3.544 | 11.662 | 0            | 0            | 15.347 |
| A_44_P4872<br>40  | Hmgcs1     | 12.102             | 8.655               | 3.447 | 10.906 | 0.0062<br>6  | 6.00E-<br>05 | 7.617  |
| A_43_P1153<br>0   | Andpro     | 17.43              | 14.031              | 3.399 | 10.551 | 1            | 0.0055<br>6  | 1.679  |
| A_44_P3137<br>23  | XM_575540  | 11.918             | 8.564               | 3.354 | 10.225 | 0.0004<br>9  | 1.00E-<br>05 | 10.048 |
| A_44_P2695<br>67  | RGD1311575 | 9.982              | 6.666               | 3.316 | 9.958  | 0            | 0            | 16.695 |
| A_43_P1645<br>7   | Creld2     | 15.761             | 12.485              | 3.276 | 9.688  | 0.0001<br>2  | 0            | 11.307 |
| A_44_P5134<br>87  | Gca        | 12.948             | 9.712               | 3.236 | 9.424  | 1.00E-<br>05 | 0            | 14.008 |
| A_42_P5930<br>20  | Rln1       | 10.023             | 6.858               | 3.165 | 8.968  | 0.1083<br>8  | 0.0005<br>1  | 4.948  |
| A_44_P1173<br>89  | M33313     | 16.772             | 13.722              | 3.05  | 8.28   | 1            | 0.0053<br>9  | 1.871  |
| A_44_P1261<br>92  | XM_344386  | 9.869              | 6.832               | 3.037 | 8.206  | 0.3331<br>9  | 0.0011<br>8  | 3.76   |
| A_44_P4585<br>70  | Fut4       | 17.278             | 14.255              | 3.023 | 8.129  | 0            | 0            | 15.877 |
| A_43_P1189<br>0   | Hmgcs1     | 15.602             | 12.595              | 3.007 | 8.038  | 5.00E-<br>05 | 0            | 12.227 |
| A_43_P1299<br>2   | Kcnh2      | 10.784             | 7.803               | 2.981 | 7.893  | 1.00E-<br>05 | 0            | 13.407 |
| A_44_P1278<br>69  | Id4        | 16.253             | 13.345              | 2.907 | 7.502  | 0.0103<br>2  | 8.00E-<br>05 | 7.152  |
| A_44_P1426<br>97  | TC524045   | 9.793              | 6.904               | 2.889 | 7.408  | 0.0002<br>5  | 1.00E-<br>05 | 10.702 |
| A_44_P4047<br>68  | AF468681   | 15.404             | 12.523              | 2.88  | 7.364  | 2.00E-<br>05 | 0            | 13.065 |
| A_42_P6141<br>75  | Gal        | 10.175             | 7.3                 | 2.875 | 7.336  | 0.6245<br>1  | 0.0018<br>2  | 3.173  |
| A_44_P2439<br>07  | RGD1561285 | 16.452             | 13.603              | 2.849 | 7.204  | 0.2867<br>5  | 0.0010<br>9  | 3.907  |
| A_44_P5907<br>48  | RGD1560496 | 13.618             | 10.805              | 2.812 | 7.024  | 0.0001<br>5  | 0            | 11.149 |
| A_43_P1284<br>3   | Idi1       | 14.276             | 11.543              | 2.733 | 6.646  | 0.0036<br>1  | 4.00E-<br>05 | 8.144  |

|               |              |        |        |       |       |          |          |        |
|---------------|--------------|--------|--------|-------|-------|----------|----------|--------|
| A_44_P338632  | Scgb2a1      | 15.561 | 12.845 | 2.716 | 6.57  | 1        | 0.00309  | 2.438  |
| A_44_P928928  | Fdps         | 15.658 | 12.956 | 2.702 | 6.508 | 0.00147  | 2.00E-05 | 8.997  |
| A_43_P18969   | Fkbp5        | 12.92  | 10.244 | 2.675 | 6.389 | 0        | 0        | 16.368 |
| A_44_P152219  | RGD1561162   | 9.767  | 7.11   | 2.657 | 6.307 | 0        | 0        | 14.266 |
| A_44_P519167  | Fkbp5        | 15.582 | 12.929 | 2.654 | 6.293 | 0.01701  | 0.00012  | 6.706  |
| A_44_P478263  | A_44_P478263 | 8.811  | 6.168  | 2.643 | 6.244 | 9.00E-05 | 0        | 11.693 |
| A_44_P960805  | DV721491     | 14.823 | 12.185 | 2.637 | 6.221 | 0.00403  | 4.00E-05 | 8.04   |
| A_42_P642152  | RGD1563136   | 10.912 | 8.275  | 2.637 | 6.218 | 0.00025  | 1.00E-05 | 10.697 |
| A_44_P1056788 | LOC680945    | 16.015 | 13.389 | 2.627 | 6.176 | 0.01679  | 0.00012  | 6.665  |
| A_44_P445382  | XM_222551    | 8.727  | 6.103  | 2.624 | 6.163 | 0.00666  | 6.00E-05 | 7.479  |
| A_44_P321686  | LOC681096    | 11.908 | 9.291  | 2.617 | 6.135 | 0        | 0        | 14.889 |
| A_44_P198396  | Scd2         | 11.447 | 8.876  | 2.571 | 5.943 | 1        | 0.0036   | 2.236  |
| A_44_P506328  | XM_342423    | 12.461 | 9.894  | 2.567 | 5.924 | 0        | 0        | 17.217 |
| A_44_P636724  | LOC689489    | 11.165 | 8.6    | 2.565 | 5.918 | 0.00331  | 4.00E-05 | 8.252  |
| A_44_P793322  | TC542673     | 9.311  | 6.759  | 2.552 | 5.866 | 0.83026  | 0.00226  | 2.868  |
| A_44_P121003  | Aspa         | 11.411 | 8.874  | 2.537 | 5.805 | 0.06841  | 0.00036  | 5.363  |
| A_44_P956005  | Slc25a30     | 12.374 | 9.847  | 2.527 | 5.763 | 0.00069  | 1.00E-05 | 9.731  |
| A_44_P135730  | Fdps         | 14.652 | 12.146 | 2.506 | 5.681 | 0.00141  | 2.00E-05 | 9.042  |
| A_44_P459452  | A_44_P459452 | 9.123  | 6.627  | 2.497 | 5.644 | 1.00E-05 | 0        | 13.573 |
| A_44_P519144  | Al234817     | 12.153 | 9.684  | 2.469 | 5.536 | 1        | 0.01785  | 0.17   |
| A_44_P246409  | BF549332     | 10.516 | 8.066  | 2.45  | 5.466 | 0.00454  | 4.00E-05 | 7.925  |
| A_44_P138689  | AA957167     | 9.661  | 7.217  | 2.445 | 5.443 | 0.00395  | 4.00E-05 | 8.104  |
| A_44_P607347  | TC540229     | 11.175 | 8.736  | 2.438 | 5.421 | 0.00913  | 8.00E-05 | 7.279  |
| A_44_P300506  | Calr         | 15.207 | 12.769 | 2.438 | 5.42  | 0.00218  | 3.00E-05 | 8.649  |
| A_44_P530547  | Prom2        | 15.543 | 13.109 | 2.434 | 5.404 | 0.56507  | 0.00171  | 3.289  |
| A_42_P688604  | Ces1         | 9.677  | 7.246  | 2.431 | 5.393 | 0.04518  | 0.00026  | 5.706  |
| A_44_P318707  | RGD1562948   | 10.811 | 8.394  | 2.417 | 5.339 | 0.00322  | 3.00E-05 | 8.256  |
| A_44_P284222  | BF556255     | 11.204 | 8.794  | 2.41  | 5.316 | 6.00E-05 | 0        | 12.01  |
| A_44_P251944  | Idi1         | 12.558 | 10.155 | 2.403 | 5.29  | 0.02857  | 0.00019  | 6.151  |
| A_44_P525250  | RGD1560208   | 15.06  | 12.674 | 2.387 | 5.23  | 0.01339  | 1.00E-04 | 6.884  |
| A_44_P206614  | CA333998     | 13.141 | 10.764 | 2.377 | 5.194 | 6.00E-05 | 0        | 12.033 |
| A_44_P959890  | AABR03000060 | 16.36  | 13.985 | 2.375 | 5.189 | 0.75277  | 0.00212  | 3.037  |
| A_43_P20288   | CB548450     | 15.458 | 13.083 | 2.375 | 5.189 | 0.00093  | 1.00E-05 | 9.445  |
| A_44_P430890  | Gpt2         | 12.085 | 9.712  | 2.373 | 5.18  | 1        | 0.0167   | 0.097  |

|                   |            |        |        |       |       |              |              |        |
|-------------------|------------|--------|--------|-------|-------|--------------|--------------|--------|
| A_43_P1281<br>1   | Srm        | 14.568 | 12.201 | 2.367 | 5.159 | 0            | 0            | 17.082 |
| A_43_P1677<br>4   | Acat2      | 13.791 | 11.432 | 2.359 | 5.13  | 0.0001<br>2  | 0            | 11.361 |
| A_44_P4779<br>27  | Cntn6      | 8.298  | 5.961  | 2.337 | 5.053 | 0.0028<br>2  | 3.00E-<br>05 | 8.331  |
| A_44_P4939<br>56  | Pdia4      | 12.752 | 10.42  | 2.332 | 5.035 | 0.0142       | 0.0001<br>1  | 6.827  |
| A_43_P1133<br>3   | Hyou1      | 16.815 | 14.484 | 2.332 | 5.033 | 0.0005<br>6  | 1.00E-<br>05 | 9.918  |
| A_42_P7946<br>13  | Mvd        | 13.372 | 11.049 | 2.323 | 5.004 | 2.00E-<br>04 | 0            | 10.909 |
| A_44_P1296<br>85  | AW142659   | 13.261 | 10.942 | 2.318 | 4.988 | 5.00E-<br>05 | 0            | 12.151 |
| A_44_P4167<br>84  | PRP-2      | 11.75  | 9.432  | 2.318 | 4.986 | 0.001        | 1.00E-<br>05 | 9.375  |
| A_42_P4617<br>94  | Clic3      | 11.661 | 9.354  | 2.308 | 4.95  | 1            | 0.0110<br>3  | 0.746  |
| A_42_P8331<br>06  | Rad54l2    | 12.332 | 10.031 | 2.301 | 4.928 | 0.0002<br>9  | 1.00E-<br>05 | 10.511 |
| A_44_P4819<br>15  | Id4        | 14.177 | 11.916 | 2.261 | 4.793 | 0.0962<br>8  | 0.0004<br>7  | 4.971  |
| A_44_P4124<br>27  | RGD1311475 | 15.619 | 13.365 | 2.254 | 4.77  | 0.2835<br>7  | 0.0010<br>8  | 3.959  |
| A_44_P3783<br>22  | AA858768   | 11.029 | 8.776  | 2.253 | 4.765 | 0.0048       | 4.00E-<br>05 | 7.873  |
| A_44_P4500<br>55  | RGD1562437 | 7.864  | 5.63   | 2.234 | 4.706 | 0.0004<br>3  | 1.00E-<br>05 | 10.177 |
| A_44_P5322<br>49  | Fkbp5      | 16.334 | 14.105 | 2.229 | 4.688 | 0.0024       | 3.00E-<br>05 | 8.552  |
| A_44_P2428<br>95  | Hyou1      | 10.687 | 8.459  | 2.228 | 4.686 | 0.0078<br>7  | 7.00E-<br>05 | 7.446  |
| A_44_P1570<br>30  | LOC316493  | 8.075  | 5.847  | 2.228 | 4.686 | 1.00E-<br>05 | 0            | 14.186 |
| A_44_P1925<br>43  | Fkbp11     | 14.285 | 12.061 | 2.224 | 4.67  | 0.0011<br>6  | 2.00E-<br>05 | 9.228  |
| A_44_P3771<br>36  | PRP-2      | 12.527 | 10.306 | 2.221 | 4.661 | 0.0297<br>4  | 0.0001<br>9  | 6.112  |
| A_43_P1062<br>5   | TC523715   | 16.361 | 14.16  | 2.201 | 4.597 | 0.0885<br>3  | 0.0004<br>4  | 5.14   |
| A_43_P1953<br>6   | Gpt2       | 10.905 | 8.726  | 2.179 | 4.529 | 1            | 0.0167       | 0.099  |
| A_44_P5004<br>31  | Lman1      | 12.975 | 10.815 | 2.16  | 4.469 | 0            | 0            | 14.527 |
| A_44_P8508<br>80  | AA955605   | 11.36  | 9.202  | 2.158 | 4.464 | 1            | 0.0054<br>6  | 1.684  |
| A_43_P1479<br>6   | LOC682861  | 12.484 | 10.329 | 2.154 | 4.452 | 0.0009<br>1  | 1.00E-<br>05 | 9.46   |
| A_44_P8854<br>45  | LOC681096  | 14.427 | 12.273 | 2.154 | 4.451 | 0.0111<br>3  | 9.00E-<br>05 | 7.037  |
| A_42_P7811<br>16  | Paqr5      | 10.622 | 8.468  | 2.154 | 4.449 | 0.3800<br>4  | 0.0012<br>9  | 3.674  |
| A_44_P5317<br>52  | Bcat2      | 13.892 | 11.756 | 2.136 | 4.395 | 0.0700<br>8  | 0.0003<br>6  | 5.28   |
| A_44_P1658<br>92  | LOC678834  | 11.154 | 9.019  | 2.134 | 4.39  | 0.0042<br>8  | 4.00E-<br>05 | 8.009  |
| A_44_P8985<br>22  | RGD1563166 | 8.24   | 6.11   | 2.13  | 4.377 | 0.0001<br>6  | 0            | 11.095 |
| A_44_P2272<br>43  | RGD1309610 | 12.451 | 10.333 | 2.119 | 4.343 | 1            | 0.0120<br>8  | 0.606  |
| A_44_P5104<br>70  | Pex11a     | 10.847 | 8.735  | 2.112 | 4.324 | 0.0009<br>9  | 1.00E-<br>05 | 9.38   |
| A_44_P8375<br>80  | BG668811   | 14.243 | 12.138 | 2.104 | 4.3   | 0.0005<br>8  | 1.00E-<br>05 | 9.889  |
| A_42_P8400<br>94  | Slc9a2     | 8.958  | 6.867  | 2.091 | 4.26  | 1            | 0.0182<br>6  | 0.029  |
| A_44_P1008<br>950 | LOC290651  | 14.731 | 12.641 | 2.09  | 4.257 | 1            | 0.0026<br>5  | 2.841  |



|                   |            |        |        |       |       |              |              |        |
|-------------------|------------|--------|--------|-------|-------|--------------|--------------|--------|
| A_44_P1260<br>27  | Pfkfb4     | 8.948  | 6.858  | 2.089 | 4.256 | 0.0020<br>9  | 3.00E-<br>05 | 8.667  |
| A_44_P3469<br>01  | Slc10a4    | 8.242  | 6.159  | 2.083 | 4.237 | 0.4635<br>6  | 0.0014<br>7  | 3.438  |
| A_44_P8235<br>97  | Akap7      | 10.279 | 8.209  | 2.07  | 4.2   | 0.0022<br>2  | 3.00E-<br>05 | 8.612  |
| A_44_P9122<br>91  | AW523955   | 8.334  | 6.264  | 2.069 | 4.197 | 0.0009<br>6  | 1.00E-<br>05 | 9.427  |
| A_44_P4103<br>31  | XM_219839  | 13.407 | 11.364 | 2.043 | 4.121 | 0.0050<br>3  | 5.00E-<br>05 | 7.827  |
| A_44_P1048<br>04  | Tmem66     | 17.225 | 15.183 | 2.041 | 4.116 | 1            | 0.0064       | 1.678  |
| A_44_P1013<br>713 | LOC683733  | 8.705  | 6.669  | 2.036 | 4.1   | 1            | 0.0044       | 1.958  |
| A_44_P1915<br>57  | Z13994     | 11.591 | 9.56   | 2.031 | 4.087 | 0.0110<br>1  | 9.00E-<br>05 | 7.073  |
| A_44_P3342<br>18  | Lss        | 13.122 | 11.104 | 2.018 | 4.049 | 0.0291       | 0.0001<br>9  | 6.133  |
| A_44_P3653<br>79  | Gadd45g    | 17.193 | 15.179 | 2.015 | 4.04  | 1            | 0.0090<br>5  | 1.184  |
| A_44_P1055<br>506 | LOC683733  | 8.84   | 6.84   | 2     | 4     | 0.9813<br>6  | 0.0025<br>7  | 2.705  |
| A_42_P5617<br>54  | Pex11a     | 11.722 | 9.731  | 1.99  | 3.973 | 0.0388<br>8  | 0.0002<br>3  | 5.852  |
| A_44_P6106<br>34  | RGD1562331 | 9.809  | 7.839  | 1.971 | 3.919 | 0.0036<br>5  | 4.00E-<br>05 | 8.135  |
| A_44_P3581<br>94  | Fmo3       | 10.759 | 8.789  | 1.969 | 3.916 | 1            | 0.0143<br>1  | 0.371  |
| A_44_P2010<br>77  | Asrgl1     | 12.075 | 10.107 | 1.968 | 3.912 | 1            | 0.0107<br>5  | 0.756  |
| A_43_P2314<br>3   | LOC679989  | 7.719  | 5.756  | 1.964 | 3.9   | 0.0061<br>1  | 5.00E-<br>05 | 7.641  |
| A_44_P3481<br>57  | Snca       | 11.433 | 9.472  | 1.961 | 3.894 | 1            | 0.0121<br>2  | 0.547  |
| A_44_P1161<br>72  | Armet      | 16.199 | 14.245 | 1.954 | 3.875 | 0.0034<br>9  | 4.00E-<br>05 | 8.182  |
| A_44_P4425<br>69  | Esr2       | 8.448  | 6.497  | 1.951 | 3.867 | 0.0345<br>1  | 0.0002<br>1  | 5.967  |
| A_42_P6349<br>93  | Ppil1      | 13.896 | 11.946 | 1.95  | 3.862 | 0.0017<br>4  | 2.00E-<br>05 | 8.847  |
| A_44_P7622<br>16  | RGD1563166 | 12.006 | 10.057 | 1.949 | 3.862 | 0.0237<br>1  | 0.0001<br>6  | 6.331  |
| A_44_P3584<br>92  | Fdft1      | 11.708 | 9.767  | 1.942 | 3.841 | 1            | 0.0046<br>7  | 2.095  |
| A_42_P7354<br>95  | Cyp4a12    | 8.012  | 6.072  | 1.94  | 3.838 | 0.0099<br>8  | 8.00E-<br>05 | 7.168  |
| A_44_P2607<br>40  | Cbr3       | 14.877 | 12.94  | 1.937 | 3.829 | 0.1653<br>7  | 0.0007<br>1  | 4.444  |
| A_44_P5432<br>68  | LOC685766  | 11.337 | 9.401  | 1.936 | 3.826 | 1            | 0.0073<br>5  | 1.264  |
| A_44_P5552<br>53  | Dnaja1     | 17.466 | 15.54  | 1.926 | 3.8   | 0.0043<br>7  | 4.00E-<br>05 | 7.994  |
| A_44_P5250<br>59  | LOC288741  | 9.936  | 8.01   | 1.926 | 3.799 | 0.0112<br>9  | 9.00E-<br>05 | 7.048  |
| A_44_P5009<br>55  | Mc5r       | 8.006  | 6.082  | 1.923 | 3.792 | 0.1988<br>2  | 0.0008<br>3  | 4.264  |
| A_44_P1941<br>52  | Scd2       | 10.029 | 8.108  | 1.921 | 3.787 | 0.0294<br>4  | 0.0001<br>9  | 6.122  |
| A_44_P6366<br>41  | LOC681460  | 11.627 | 9.71   | 1.917 | 3.775 | 0.0035<br>9  | 4.00E-<br>05 | 8.151  |
| A_44_P1161<br>76  | Armet      | 16.197 | 14.306 | 1.89  | 3.707 | 0.0637       | 0.0003<br>4  | 5.409  |
| A_44_P5003<br>15  | Lman1      | 14.124 | 12.239 | 1.885 | 3.693 | 6.00E-<br>05 | 0            | 12.093 |
| A_44_P1040<br>579 | Prss27     | 9.021  | 7.144  | 1.877 | 3.672 | 0.9755<br>2  | 0.0025<br>6  | 2.737  |
| A_44_P2790<br>41  | Stard7     | 14.489 | 12.618 | 1.871 | 3.659 | 8.00E-<br>05 | 0            | 11.731 |

|                   |              |        |        |       |       |             |              |        |
|-------------------|--------------|--------|--------|-------|-------|-------------|--------------|--------|
| A_44_P2591<br>19  | RGD1306148   | 10.016 | 8.146  | 1.87  | 3.655 | 0.1040<br>4 | 5.00E-<br>04 | 4.895  |
| A_44_P7553<br>77  | TC551035     | 10.765 | 8.9    | 1.865 | 3.642 | 0.2662      | 0.0010<br>3  | 4.034  |
| A_44_P1269<br>38  | LOC171161    | 9.002  | 7.138  | 1.864 | 3.641 | 0.2013<br>7 | 0.0008<br>3  | 4.279  |
| A_44_P3630<br>39  | Adi1         | 14.152 | 12.296 | 1.856 | 3.621 | 0.1172<br>8 | 0.0005<br>4  | 4.816  |
| A_44_P6834<br>41  | LOC679379    | 11.596 | 9.742  | 1.853 | 3.613 | 0.0116<br>8 | 9.00E-<br>05 | 7.016  |
| A_44_P9327<br>68  | TC534706     | 13.317 | 11.47  | 1.847 | 3.596 | 1           | 0.0030<br>1  | 2.493  |
| A_44_P2315<br>83  | Csen         | 8.333  | 6.487  | 1.846 | 3.594 | 0.5483<br>3 | 0.0016<br>6  | 3.274  |
| A_44_P4072<br>59  | Usp2         | 11.374 | 9.533  | 1.841 | 3.583 | 0.4339<br>7 | 0.0014<br>2  | 3.545  |
| A_44_P1813<br>50  | AABR03065240 | 9.053  | 7.215  | 1.838 | 3.575 | 0.3319<br>1 | 0.0011<br>8  | 3.764  |
| A_44_P1021<br>489 | RGD1304759   | 11.33  | 9.496  | 1.834 | 3.565 | 1           | 0.0101<br>1  | 0.994  |
| A_44_P5067<br>56  | Hyou1        | 9.105  | 7.273  | 1.833 | 3.562 | 0.2939<br>2 | 0.0011       | 3.883  |
| A_44_P9359<br>23  | LOC680782    | 9.324  | 7.493  | 1.831 | 3.558 | 0.1532<br>3 | 0.0006<br>8  | 4.545  |
| A_44_P3956<br>85  | AY310152     | 7.412  | 5.581  | 1.831 | 3.558 | 0.0144<br>3 | 0.0001<br>1  | 6.855  |
| A_44_P8991<br>75  | A_44_P899175 | 11.363 | 9.535  | 1.828 | 3.551 | 1           | 0.0149       | 0.253  |
| A_43_P1571<br>9   | Tra1         | 16.343 | 14.515 | 1.828 | 3.55  | 1           | 0.0071<br>5  | 1.412  |
| A_44_P1682<br>85  | Cyp51        | 12.759 | 10.933 | 1.826 | 3.545 | 1           | 0.0106<br>4  | 0.716  |
| A_44_P4333<br>34  | Tra1         | 12.722 | 10.899 | 1.824 | 3.54  | 0.1494<br>4 | 0.0006<br>6  | 4.543  |
| A_42_P5703<br>13  | Ces3         | 13.824 | 12.005 | 1.819 | 3.528 | 1           | 0.0058<br>1  | 1.711  |
| A_44_P5439<br>65  | A_44_P543965 | 12.2   | 10.384 | 1.816 | 3.522 | 0.0037<br>5 | 4.00E-<br>05 | 8.135  |
| A_44_P1050<br>889 | Mlstd2       | 12.039 | 10.224 | 1.816 | 3.52  | 1           | 0.0031       | 2.618  |
| A_44_P5098<br>72  | Stard7       | 11.003 | 9.187  | 1.815 | 3.519 | 0.024       | 0.0001<br>6  | 6.32   |
| A_42_P6040<br>33  | Eaf2         | 14.16  | 12.351 | 1.809 | 3.504 | 1           | 0.0038<br>3  | 2.151  |
| A_44_P3984<br>55  | Sec24d       | 9.392  | 7.585  | 1.808 | 3.5   | 0.0102<br>3 | 8.00E-<br>05 | 7.169  |
| A_44_P2406<br>96  | Nppc         | 7.373  | 5.584  | 1.79  | 3.457 | 1           | 0.0144<br>4  | 0.299  |
| A_44_P3062<br>38  | BF287427     | 9.871  | 8.088  | 1.783 | 3.44  | 1           | 0.0064<br>2  | 1.619  |
| A_44_P6389<br>15  | TC543039     | 13.221 | 11.443 | 1.777 | 3.428 | 1           | 0.0073       | 1.328  |
| A_44_P1236<br>77  | Syng1        | 10.157 | 8.389  | 1.768 | 3.406 | 0.0618<br>1 | 0.0003<br>3  | 5.46   |
| A_44_P5593<br>31  | Ankrd5       | 9.046  | 7.284  | 1.763 | 3.393 | 1           | 0.0062<br>6  | 1.462  |
| A_44_P4736<br>03  | A_44_P473603 | 12.291 | 10.532 | 1.758 | 3.383 | 1           | 0.0110<br>6  | 0.684  |
| A_44_P2019<br>50  | AA956206     | 7.502  | 5.756  | 1.746 | 3.353 | 0.0461<br>4 | 0.0002<br>6  | 5.713  |
| A_44_P9778<br>13  | TC565444     | 8.991  | 7.247  | 1.745 | 3.351 | 0.0040<br>3 | 4.00E-<br>05 | 8.04   |
| A_43_P1426<br>5   | TC523554     | 10.493 | 8.751  | 1.742 | 3.345 | 0.0003<br>7 | 1.00E-<br>05 | 10.307 |
| A_44_P1004<br>340 | Sar1b        | 15.218 | 13.483 | 1.735 | 3.33  | 0.7340<br>3 | 0.0020<br>9  | 2.989  |
| A_44_P1042<br>859 | Ahdc1        | 11.635 | 9.901  | 1.734 | 3.326 | 0.0305<br>9 | 0.0001<br>9  | 6.11   |

|                   |              |        |        |       |       |             |              |        |
|-------------------|--------------|--------|--------|-------|-------|-------------|--------------|--------|
| A_44_P3729<br>98  | Cpa6         | 8.976  | 7.246  | 1.73  | 3.317 | 0.0452      | 0.0002<br>6  | 5.733  |
| A_44_P1056<br>949 | LOC678834    | 13.134 | 11.406 | 1.728 | 3.313 | 0.7785<br>2 | 0.0021<br>8  | 2.977  |
| A_44_P5136<br>35  | A_44_P513635 | 10.165 | 8.447  | 1.717 | 3.288 | 0.7733<br>8 | 0.0021<br>7  | 2.938  |
| A_42_P7563<br>93  | AW920459     | 14.455 | 12.739 | 1.716 | 3.286 | 0.3654      | 0.0012<br>5  | 3.713  |
| A_44_P1972<br>85  | AA956971     | 14.242 | 12.534 | 1.708 | 3.267 | 0.0075<br>1 | 7.00E-<br>05 | 7.442  |
| A_44_P5416<br>23  | RGD1310875   | 11.241 | 9.539  | 1.701 | 3.252 | 0.7742<br>5 | 0.0021<br>7  | 2.936  |
| A_44_P3681<br>34  | Sncaip       | 9.102  | 7.401  | 1.701 | 3.252 | 0.0161<br>9 | 0.0001<br>2  | 6.701  |
| A_43_P1663<br>9   | LOC680782    | 11.215 | 9.516  | 1.699 | 3.246 | 0.1084<br>2 | 0.0005<br>1  | 4.855  |
| A_44_P1047<br>924 | Herpud1      | 14.897 | 13.2   | 1.696 | 3.241 | 0.0281<br>5 | 0.0001<br>8  | 6.165  |
| A_44_P7559<br>12  | AW916093     | 11.853 | 10.158 | 1.695 | 3.239 | 1           | 0.0089<br>3  | 0.983  |
| A_44_P1876<br>41  | RGD1307610   | 13.049 | 11.355 | 1.694 | 3.236 | 1           | 0.0161<br>6  | 0.15   |
| A_44_P3189<br>99  | Amd1         | 13.237 | 11.544 | 1.693 | 3.233 | 0.1084<br>7 | 0.0005<br>1  | 4.855  |
| A_44_P5205<br>09  | Surf4        | 15.255 | 13.565 | 1.69  | 3.227 | 0.0030<br>5 | 3.00E-<br>05 | 8.307  |
| A_44_P4718<br>18  | LOC689616    | 9.406  | 7.724  | 1.682 | 3.209 | 1           | 0.0150<br>7  | 0.234  |
| A_44_P3655<br>80  | Sqle         | 12.927 | 11.247 | 1.679 | 3.203 | 1           | 0.0038<br>9  | 2.15   |
| A_44_P1045<br>834 | Gmppb        | 12.093 | 10.414 | 1.679 | 3.202 | 0.2969<br>1 | 0.0011       | 3.979  |
| A_44_P4457<br>85  | LOC678926    | 11.127 | 9.455  | 1.672 | 3.188 | 1           | 0.0038<br>9  | 2.157  |
| A_44_P2671<br>17  | Gale         | 12.776 | 11.106 | 1.671 | 3.184 | 1           | 0.0039<br>2  | 2.11   |
| A_44_P4211<br>72  | LOC683036    | 9.105  | 7.438  | 1.667 | 3.175 | 0.1131<br>6 | 0.0005<br>3  | 4.877  |
| A_44_P5177<br>38  | Keg1         | 7.044  | 5.381  | 1.664 | 3.169 | 0.0075<br>9 | 7.00E-<br>05 | 7.445  |
| A_44_P4613<br>04  | Dnajb11      | 12.242 | 10.581 | 1.661 | 3.163 | 0.4172<br>5 | 0.0013<br>8  | 3.541  |
| A_44_P8101<br>90  | LOC686980    | 13.457 | 11.797 | 1.66  | 3.16  | 0.2000<br>1 | 0.0008<br>3  | 4.259  |
| A_44_P1008<br>120 | Nans         | 14.154 | 12.495 | 1.659 | 3.157 | 0.0005<br>9 | 1.00E-<br>05 | 9.872  |
| A_44_P3447<br>49  | XM_225257    | 14.401 | 12.746 | 1.654 | 3.148 | 1           | 0.0076<br>4  | 1.261  |
| A_44_P3156<br>72  | K02813       | 8.171  | 6.517  | 1.654 | 3.147 | 0.0011<br>6 | 2.00E-<br>05 | 9.231  |
| A_44_P8808<br>42  | CV795401     | 10.646 | 8.994  | 1.652 | 3.142 | 0.0377<br>4 | 0.0002<br>2  | 5.881  |
| A_43_P1873<br>7   | Ptpn9        | 12.817 | 11.168 | 1.649 | 3.137 | 0.0056<br>4 | 5.00E-<br>05 | 7.749  |
| A_44_P2617<br>79  | LOC683733    | 10.813 | 9.174  | 1.639 | 3.115 | 1           | 0.0071       | 1.295  |
| A_43_P1821<br>0   | RGD1306148   | 11.862 | 10.225 | 1.637 | 3.11  | 0.8531      | 0.0023<br>1  | 2.842  |
| A_42_P6866<br>80  | Ubqln2       | 10.236 | 8.603  | 1.633 | 3.101 | 0.0145<br>7 | 0.0001<br>1  | 6.802  |
| A_44_P3239<br>14  | Sms          | 11.638 | 10.011 | 1.627 | 3.088 | 0.1524<br>2 | 0.0006<br>8  | 4.551  |
| A_44_P3156<br>61  | Hmgcr        | 11.796 | 10.176 | 1.62  | 3.074 | 1           | 0.0156<br>7  | 0.188  |
| A_44_P1052<br>934 | Tmem97       | 12.573 | 10.956 | 1.617 | 3.067 | 0.0001<br>8 | 0            | 10.999 |
| A_44_P4096<br>62  | B3gnt5       | 8.582  | 6.965  | 1.617 | 3.067 | 0.0219<br>5 | 0.0001<br>5  | 6.406  |

|                   |            |        |        |       |       |             |              |       |
|-------------------|------------|--------|--------|-------|-------|-------------|--------------|-------|
| A_44_P2064<br>34  | RGD1563803 | 13.63  | 12.014 | 1.616 | 3.064 | 0.7226<br>5 | 0.0020<br>6  | 3.004 |
| A_44_P2652<br>37  | Nid2       | 8.45   | 6.838  | 1.613 | 3.058 | 0.1946<br>1 | 0.0008<br>2  | 4.285 |
| A_44_P7301<br>97  | TC539976   | 9.566  | 7.959  | 1.606 | 3.045 | 0.0394      | 0.0002<br>3  | 5.839 |
| A_42_P8303<br>11  | Mrap       | 10.047 | 8.446  | 1.601 | 3.034 | 1           | 0.0029<br>1  | 2.591 |
| A_44_P3215<br>10  | LOC691431  | 10.044 | 8.447  | 1.597 | 3.025 | 1           | 0.0029<br>3  | 2.575 |
| A_44_P1011<br>305 | Mylk       | 11.63  | 10.033 | 1.597 | 3.025 | 1           | 0.0071       | 1.296 |
| A_42_P7277<br>11  | LOC689755  | 12.987 | 11.394 | 1.593 | 3.017 | 0.7145<br>3 | 0.0020<br>4  | 3.015 |
| A_44_P1020<br>541 | TC539589   | 12.173 | 10.587 | 1.586 | 3.001 | 1           | 0.0054<br>3  | 1.673 |
| A_44_P1453<br>00  | Lamp3      | 7.482  | 5.9    | 1.581 | 2.993 | 0.3977<br>2 | 0.0013<br>4  | 3.587 |
| A_44_P9743<br>99  | RGD1559938 | 11.234 | 9.654  | 1.58  | 2.99  | 0.1378      | 0.0006<br>2  | 4.622 |
| A_42_P8368<br>80  | Ldlr       | 7.984  | 6.406  | 1.578 | 2.985 | 1           | 0.0027<br>6  | 2.603 |
| A_44_P1002<br>72  | Dnttip1    | 15.165 | 13.593 | 1.572 | 2.974 | 0.0032      | 3.00E-<br>05 | 8.262 |
| A_44_P2865<br>45  | AA955043   | 8.488  | 6.917  | 1.571 | 2.971 | 0.4151<br>3 | 0.0013<br>8  | 3.546 |
| A_44_P1822<br>20  | Amigo3     | 8.028  | 6.458  | 1.571 | 2.97  | 0.188       | 8.00E-<br>04 | 4.481 |
| A_44_P8076<br>69  | TC539961   | 11.565 | 9.995  | 1.57  | 2.969 | 1           | 0.0047<br>4  | 1.855 |
| A_44_P3465<br>72  | Ssr1       | 13.444 | 11.882 | 1.562 | 2.952 | 0.0017<br>8 | 2.00E-<br>05 | 8.844 |
| A_44_P2934<br>23  | Hoxb13     | 13.799 | 12.238 | 1.561 | 2.951 | 1           | 0.0075<br>4  | 1.284 |
| A_44_P5380<br>86  | Oact2      | 11.734 | 10.174 | 1.56  | 2.948 | 1           | 0.0061<br>9  | 1.481 |
| A_44_P5042<br>61  | RGD1309930 | 13.134 | 11.575 | 1.559 | 2.947 | 1           | 0.0033<br>8  | 2.35  |
| A_44_P2441<br>38  | Ptpn9      | 11.876 | 10.32  | 1.556 | 2.941 | 0.0565<br>8 | 0.0003<br>1  | 5.488 |
| A_44_P2382<br>10  | Mig12      | 14.157 | 12.601 | 1.556 | 2.941 | 0.3014<br>8 | 0.0011<br>1  | 3.995 |
| A_44_P2081<br>33  | Klk1c10    | 10.46  | 8.905  | 1.555 | 2.938 | 0.3032      | 0.0011<br>1  | 3.852 |
| A_44_P4863<br>12  | Fmo2       | 11.291 | 9.739  | 1.552 | 2.932 | 1           | 0.0088<br>9  | 0.991 |
| A_43_P1308<br>8   | Sc4mol     | 15.961 | 14.417 | 1.545 | 2.918 | 1           | 0.0186<br>7  | 0.186 |
| A_42_P5847<br>34  | Gdf10      | 10.513 | 8.98   | 1.533 | 2.894 | 1           | 0.0057<br>6  | 1.688 |
| A_44_P1038<br>655 | RGD1311859 | 9.997  | 8.469  | 1.528 | 2.884 | 0.3294<br>3 | 0.0011<br>7  | 3.771 |
| A_44_P4155<br>18  | Dnajc3     | 14.791 | 13.266 | 1.525 | 2.878 | 0.3196<br>9 | 0.0011<br>5  | 3.842 |
| A_44_P5558<br>62  | LOC681802  | 15.587 | 14.065 | 1.522 | 2.871 | 0.0341<br>7 | 0.0002<br>1  | 6.057 |
| A_43_P1168<br>4   | Alpl       | 14.152 | 12.631 | 1.522 | 2.871 | 0.4266      | 0.0014       | 3.519 |
| A_44_P8083<br>10  | TC541487   | 10.055 | 8.541  | 1.513 | 2.855 | 1           | 0.0148<br>2  | 0.265 |
| A_44_P1497<br>67  | RGD1566383 | 8.485  | 6.978  | 1.507 | 2.843 | 1           | 0.0104<br>7  | 0.737 |
| A_44_P1056<br>222 | RGD1306148 | 15.329 | 13.823 | 1.506 | 2.839 | 0.0258<br>8 | 0.0001<br>7  | 6.247 |
| A_43_P2176<br>2   | Slc25a30   | 8.637  | 7.136  | 1.501 | 2.83  | 1           | 0.0046<br>6  | 1.91  |
| A_44_P1572<br>94  | BU759558   | 8.359  | 6.865  | 1.494 | 2.818 | 1           | 0.0054<br>3  | 1.722 |

|               |                   |        |        |       |       |         |          |       |
|---------------|-------------------|--------|--------|-------|-------|---------|----------|-------|
| A_44_P440082  | Scd2              | 8.125  | 6.634  | 1.491 | 2.81  | 1       | 0.00956  | 0.936 |
| A_44_P356312  | LOC365251, Mlstd2 | 9.691  | 8.201  | 1.491 | 2.81  | 1       | 0.00343  | 2.3   |
| A_44_P523112  | RGD1306148        | 14.113 | 12.632 | 1.481 | 2.792 | 1       | 0.0031   | 2.475 |
| A_44_P425745  | BM387864          | 8.331  | 6.853  | 1.478 | 2.785 | 1       | 0.00549  | 1.943 |
| A_42_P487686  | Agr2              | 8.515  | 7.038  | 1.476 | 2.782 | 0.14751 | 0.00066  | 4.555 |
| A_43_P12524   | Ssr3              | 11.573 | 10.097 | 1.476 | 2.781 | 0.25113 | 0.00099  | 4.037 |
| A_44_P329170  | Ubap2             | 10.007 | 8.54   | 1.468 | 2.766 | 1       | 0.00269  | 2.64  |
| A_42_P723173  | Id1               | 11.435 | 9.969  | 1.465 | 2.761 | 0.60468 | 0.00178  | 3.223 |
| A_44_P112050  | RGD1560523        | 10.421 | 8.962  | 1.459 | 2.749 | 1       | 0.00299  | 2.49  |
| A_44_P512874  | Cth               | 9.666  | 8.209  | 1.457 | 2.746 | 1       | 0.01431  | 0.339 |
| A_44_P114732  | TC524488          | 11.225 | 9.769  | 1.456 | 2.744 | 0.29394 | 0.0011   | 3.924 |
| A_44_P938669  | TC552370          | 12.037 | 10.583 | 1.454 | 2.74  | 1       | 0.00383  | 2.152 |
| A_44_P444724  | Scd2              | 7.452  | 6.001  | 1.451 | 2.733 | 0.01001 | 8.00E-05 | 7.165 |
| A_42_P605711  | RGD1311381        | 11.242 | 9.797  | 1.445 | 2.723 | 0.00407 | 4.00E-05 | 8.053 |
| A_44_P163408  | Slc12a2           | 10.584 | 9.14   | 1.444 | 2.721 | 1       | 0.01755  | 0.112 |
| A_44_P105462  | Cpa6              | 7.391  | 5.947  | 1.443 | 2.72  | 1       | 0.00494  | 1.823 |
| A_44_P471848  | XM_225257         | 10.867 | 9.424  | 1.443 | 2.719 | 1       | 0.00658  | 1.389 |
| A_44_P1054213 | Hspa5             | 16.945 | 15.507 | 1.438 | 2.71  | 1       | 0.01431  | 0.566 |
| A_44_P452291  | Hk2               | 9.881  | 8.444  | 1.437 | 2.708 | 0.20461 | 0.00084  | 4.264 |
| A_44_P321506  | LOC691431         | 10.927 | 9.494  | 1.433 | 2.7   | 1       | 0.00382  | 2.158 |
| A_44_P395975  | Ndn12             | 13.806 | 12.375 | 1.432 | 2.698 | 1       | 0.01254  | 0.712 |
| A_44_P959463  | LOC681522         | 10.136 | 8.706  | 1.43  | 2.695 | 0.01365 | 1.00E-04 | 6.865 |
| A_44_P264777  | Dnajb9            | 13.009 | 11.593 | 1.416 | 2.669 | 1       | 0.00274  | 2.638 |
| A_44_P175240  | Cyp7b1            | 11.853 | 10.442 | 1.411 | 2.659 | 1       | 0.01347  | 0.395 |
| A_44_P119160  | Papss2            | 13.341 | 11.937 | 1.404 | 2.646 | 0.96551 | 0.00254  | 2.721 |
| A_44_P290074  | Al030162          | 9.609  | 8.206  | 1.403 | 2.645 | 1       | 0.0039   | 2.119 |
| A_44_P1043555 | XM_216326         | 14.292 | 12.891 | 1.402 | 2.642 | 0.05735 | 0.00031  | 5.474 |
| A_44_P370465  | XM_214407         | 10.487 | 9.088  | 1.399 | 2.637 | 0.97657 | 0.00256  | 2.756 |
| A_44_P1048380 | RGD1311381        | 16.195 | 14.803 | 1.393 | 2.625 | 0.27728 | 0.00106  | 3.94  |
| A_44_P258336  | Tmem39a           | 11.163 | 9.774  | 1.389 | 2.619 | 1       | 0.00976  | 0.85  |
| A_44_P155971  | RGD1563325        | 8.629  | 7.242  | 1.388 | 2.617 | 1       | 0.00472  | 1.863 |
| A_44_P407736  | RGD1304890        | 12.424 | 11.038 | 1.386 | 2.614 | 0.058   | 0.00031  | 5.491 |
| A_44_P530075  | A_44_P530075      | 12.58  | 11.197 | 1.383 | 2.609 | 0.3155  | 0.00114  | 3.814 |
| A_43_P10329   | Abhd2             | 9.772  | 8.389  | 1.383 | 2.608 | 0.84485 | 0.00229  | 2.851 |

|               |            |        |        |       |       |         |          |       |
|---------------|------------|--------|--------|-------|-------|---------|----------|-------|
| A_43_P10371   | RGD1311422 | 10.83  | 9.45   | 1.38  | 2.602 | 0.03728 | 0.00022  | 5.893 |
| A_44_P225105  | Dach2      | 9.882  | 8.502  | 1.38  | 2.602 | 1       | 0.00517  | 1.87  |
| A_44_P393531  | Adipoq     | 13.359 | 11.98  | 1.379 | 2.6   | 1       | 0.00766  | 1.18  |
| A_44_P716795  | TC546385   | 11.214 | 9.837  | 1.377 | 2.597 | 0.60753 | 0.00179  | 3.173 |
| A_44_P447650  | Adarb1     | 11.103 | 9.731  | 1.372 | 2.588 | 1       | 0.00339  | 2.473 |
| A_44_P994768  | Ssr3       | 14.655 | 13.284 | 1.371 | 2.587 | 0.00064 | 1.00E-05 | 9.799 |
| A_44_P714007  | LOC500292  | 11.035 | 9.665  | 1.37  | 2.585 | 1       | 0.00985  | 0.835 |
| A_44_P446817  | RGD1561797 | 11.956 | 10.587 | 1.369 | 2.583 | 1       | 0.00819  | 1.174 |
| A_44_P155932  | Wdr6       | 10.076 | 8.713  | 1.363 | 2.573 | 1       | 0.01802  | 0.05  |
| A_44_P929695  | Cdc2l6     | 14.773 | 13.412 | 1.361 | 2.569 | 0.04213 | 0.00024  | 5.774 |
| A_44_P324155  | RGD1309701 | 10.053 | 8.694  | 1.359 | 2.564 | 0.1609  | 7.00E-04 | 4.471 |
| A_43_P13272   | Agt        | 11.333 | 9.979  | 1.354 | 2.557 | 1       | 0.01424  | 0.328 |
| A_44_P195648  | RGD1304890 | 13.705 | 12.357 | 1.349 | 2.547 | 0.02976 | 0.00019  | 6.111 |
| A_42_P771337  | Lamp3      | 7.445  | 6.1    | 1.345 | 2.541 | 0.65    | 0.00187  | 3.134 |
| A_44_P1045526 | Piga       | 9.488  | 8.145  | 1.343 | 2.537 | 1       | 0.00356  | 2.255 |
| A_43_P10681   | TC554503   | 15.493 | 14.15  | 1.343 | 2.536 | 0.07367 | 0.00038  | 5.291 |
| A_42_P750340  | RGD1563319 | 9.708  | 8.37   | 1.338 | 2.529 | 1       | 0.00449  | 1.929 |
| A_44_P226315  | Slc16a10   | 9.323  | 7.985  | 1.338 | 2.528 | 0.79798 | 0.0022   | 2.907 |
| A_44_P1044658 | S43941     | 11.043 | 9.706  | 1.336 | 2.525 | 1       | 0.01025  | 0.773 |
| A_44_P808496  | RGD1562590 | 13.548 | 12.217 | 1.331 | 2.516 | 0.11401 | 0.00053  | 4.806 |
| A_44_P366142  | Zbtb16     | 10.757 | 9.427  | 1.33  | 2.515 | 1       | 0.01321  | 0.421 |
| A_44_P933805  | TC563973   | 9.677  | 8.349  | 1.328 | 2.511 | 1       | 0.00584  | 1.563 |
| A_44_P592381  | RGD1563633 | 11.534 | 10.208 | 1.326 | 2.507 | 1       | 0.01013  | 0.819 |
| A_44_P395978  | Ndnf2      | 13.913 | 12.588 | 1.325 | 2.505 | 1       | 0.0144   | 0.384 |
| A_44_P639832  | Dhh        | 8.16   | 6.836  | 1.324 | 2.504 | 1       | 0.00527  | 1.716 |
| A_44_P555417  | RGD1310475 | 10.171 | 8.848  | 1.323 | 2.502 | 0.3385  | 0.00119  | 3.745 |
| A_44_P127597  | Dnajb9     | 12.751 | 11.432 | 1.319 | 2.495 | 1       | 0.00332  | 2.372 |
| A_44_P126161  | Cdc37f1    | 8.909  | 7.59   | 1.319 | 2.495 | 1       | 0.00301  | 2.492 |
| A_42_P746647  | Gba3       | 6.61   | 5.292  | 1.318 | 2.493 | 1       | 0.00412  | 2.044 |
| A_43_P18674   | Tmem39a    | 10.442 | 9.137  | 1.305 | 2.471 | 1       | 0.00522  | 1.728 |
| A_43_P18176   | Ube1dc1    | 13.661 | 12.356 | 1.305 | 2.471 | 1       | 0.00773  | 1.165 |
| A_44_P300171  | Gcat       | 10.33  | 9.025  | 1.304 | 2.47  | 1       | 0.01053  | 0.729 |
| A_43_P20638   | RGD1309582 | 8.761  | 7.457  | 1.304 | 2.469 | 1       | 0.00632  | 1.45  |
| A_44_P414996  | Gfpt1      | 10.853 | 9.552  | 1.301 | 2.464 | 1       | 0.00477  | 1.894 |

|               |            |        |        |       |       |         |          |       |
|---------------|------------|--------|--------|-------|-------|---------|----------|-------|
| A_44_P592461  | Msh3       | 12.562 | 11.261 | 1.301 | 2.464 | 1       | 0.00339  | 2.39  |
| A_43_P11330   | Pdia6      | 12.582 | 11.282 | 1.3   | 2.463 | 1       | 0.00357  | 2.251 |
| A_44_P480285  | Kif2c      | 12.091 | 10.792 | 1.299 | 2.461 | 1       | 0.00557  | 1.626 |
| A_44_P126154  | Cdc3711    | 11.946 | 10.649 | 1.297 | 2.458 | 0.0342  | 0.00021  | 6.003 |
| A_43_P15540   | Vdp        | 13.511 | 12.216 | 1.295 | 2.454 | 0.00149 | 2.00E-05 | 8.993 |
| A_44_P144237  | Erp29      | 14.191 | 12.898 | 1.294 | 2.451 | 0.03524 | 0.00021  | 5.974 |
| A_43_P11230   | RGD1563633 | 16.06  | 14.766 | 1.294 | 2.451 | 0.60284 | 0.00178  | 3.226 |
| A_43_P15147   | TC561327   | 7.381  | 6.092  | 1.29  | 2.445 | 1       | 0.00301  | 2.575 |
| A_44_P411173  | DV727337   | 11.382 | 10.095 | 1.287 | 2.44  | 1       | 0.01679  | 0.11  |
| A_44_P358756  | Frem2      | 8.328  | 7.042  | 1.286 | 2.439 | 1       | 0.00301  | 2.546 |
| A_44_P269865  | LOC367808  | 8.908  | 7.622  | 1.286 | 2.439 | 1       | 0.01287  | 0.461 |
| A_44_P536708  | XM_214409  | 11.436 | 10.151 | 1.285 | 2.437 | 1       | 0.00397  | 2.094 |
| A_42_P718390  | MGC124825  | 14.046 | 12.762 | 1.284 | 2.435 | 0.59251 | 0.00177  | 3.198 |
| A_42_P557293  | RGD1308284 | 12.813 | 11.531 | 1.282 | 2.432 | 1       | 0.00441  | 2.004 |
| A_44_P408187  | Tfg        | 13.934 | 12.653 | 1.281 | 2.431 | 1       | 0.00478  | 1.841 |
| A_44_P777829  | TC525249   | 7.985  | 6.704  | 1.281 | 2.429 | 1       | 0.00868  | 1.071 |
| A_44_P286264  | Gba2       | 12.616 | 11.338 | 1.278 | 2.425 | 1       | 0.00599  | 1.704 |
| A_42_P781585  | Bex4       | 8.181  | 6.909  | 1.272 | 2.415 | 1       | 0.01226  | 0.58  |
| A_44_P324410  | Tmem87a    | 9.358  | 8.086  | 1.272 | 2.415 | 1       | 0.00682  | 1.595 |
| A_44_P210394  | LOC685766  | 10.494 | 9.226  | 1.269 | 2.41  | 1       | 0.0162   | 0.332 |
| A_44_P240953  | Pcsk3      | 13.027 | 11.759 | 1.269 | 2.409 | 0.0204  | 0.00015  | 6.477 |
| A_44_P396460  | Scap       | 16.207 | 14.939 | 1.268 | 2.407 | 1       | 0.00416  | 2.08  |
| A_44_P227236  | Btn2a2     | 8.529  | 7.262  | 1.267 | 2.406 | 1       | 0.00841  | 1.088 |
| A_44_P900209  | Abhd2      | 10.936 | 9.672  | 1.265 | 2.403 | 1       | 0.0028   | 2.589 |
| A_44_P555689  | Ces3       | 9.428  | 8.166  | 1.261 | 2.397 | 1       | 0.00742  | 1.228 |
| A_44_P309202  | Slc25a22   | 12.819 | 11.559 | 1.259 | 2.394 | 1       | 0.00749  | 1.333 |
| A_44_P395977  | Ndnl2      | 14.344 | 13.086 | 1.259 | 2.392 | 1       | 0.00623  | 1.524 |
| A_44_P871622  | Syvn1      | 14.784 | 13.53  | 1.254 | 2.386 | 1       | 0.01927  | 0.072 |
| A_44_P901138  | TC528328   | 9.205  | 7.951  | 1.254 | 2.385 | 0.6371  | 0.00185  | 3.153 |
| A_44_P505440  | CB327764   | 11.645 | 10.398 | 1.247 | 2.373 | 0.31443 | 0.00114  | 3.817 |
| A_44_P1020324 | Amd1       | 16.573 | 15.329 | 1.244 | 2.369 | 0.27109 | 0.00105  | 4.003 |
| A_44_P100716  | RGD1305801 | 7.635  | 6.396  | 1.238 | 2.359 | 1       | 0.00443  | 1.995 |
| A_44_P419337  | Kdelr2     | 11.686 | 10.45  | 1.236 | 2.355 | 0.01771 | 0.00013  | 6.614 |
| A_44_P499327  | RGD1304876 | 11.63  | 10.398 | 1.233 | 2.35  | 1       | 0.00362  | 2.226 |

|               |              |        |        |       |       |         |          |       |
|---------------|--------------|--------|--------|-------|-------|---------|----------|-------|
| A_43_P13029   | Acsi3        | 12.536 | 11.304 | 1.232 | 2.35  | 1       | 0.00558  | 1.776 |
| A_43_P12890   | Akap1        | 10.131 | 8.905  | 1.226 | 2.339 | 1       | 0.00913  | 0.944 |
| A_44_P380182  | RGD1564040   | 10.787 | 9.562  | 1.225 | 2.338 | 0.42362 | 0.0014   | 3.526 |
| A_44_P228599  | Sec2211      | 12.746 | 11.523 | 1.223 | 2.334 | 0.05418 | 3.00E-04 | 5.53  |
| A_44_P426029  | Stub1        | 11.189 | 9.967  | 1.222 | 2.333 | 0.35321 | 0.00123  | 3.703 |
| A_44_P546537  | Nucb2        | 15.463 | 14.242 | 1.221 | 2.331 | 1       | 0.00795  | 1.183 |
| A_44_P1006537 | RGD1565644   | 9.026  | 7.806  | 1.22  | 2.33  | 1       | 0.02018  | 0.06  |
| A_44_P393867  | Btn1a1       | 6.79   | 5.571  | 1.219 | 2.328 | 0.18725 | 8.00E-04 | 4.323 |
| A_44_P547643  | Fkbp11       | 8.726  | 7.508  | 1.218 | 2.326 | 1       | 0.00519  | 1.739 |
| A_44_P400507  | Calu         | 8.919  | 7.703  | 1.216 | 2.322 | 1       | 0.00732  | 1.246 |
| A_43_P15750   | Cfd          | 16.551 | 15.338 | 1.213 | 2.319 | 1       | 0.00591  | 1.627 |
| A_44_P410112  | XM_214416    | 11.157 | 9.944  | 1.212 | 2.317 | 1       | 0.00742  | 1.225 |
| A_43_P17271   | RGD1307569   | 14.359 | 13.151 | 1.208 | 2.31  | 0.45237 | 0.00145  | 3.462 |
| A_44_P1056271 | Phr1         | 11.843 | 10.638 | 1.205 | 2.306 | 0.74728 | 0.00211  | 3.017 |
| A_44_P1024890 | RGD1563660   | 11.951 | 10.748 | 1.203 | 2.302 | 0.31459 | 0.00114  | 3.816 |
| A_43_P21870   | Oact2        | 10.124 | 8.927  | 1.197 | 2.292 | 1       | 0.00966  | 0.864 |
| A_44_P126134  | Syvn1        | 9.426  | 8.23   | 1.197 | 2.292 | 0.69469 | 0.00199  | 3.042 |
| A_44_P139763  | Bet1         | 10.676 | 9.481  | 1.195 | 2.289 | 0.05489 | 3.00E-04 | 5.544 |
| A_44_P517576  | Sel1h        | 10.058 | 8.871  | 1.188 | 2.278 | 0.12473 | 0.00057  | 4.719 |
| A_43_P12973   | Frag1        | 14.562 | 13.376 | 1.187 | 2.276 | 1       | 0.01005  | 0.863 |
| A_44_P1018181 | Mmaa         | 11.328 | 10.143 | 1.185 | 2.273 | 0.09347 | 0.00046  | 5.027 |
| A_44_P358582  | Atp5g1       | 14.653 | 13.471 | 1.182 | 2.269 | 1       | 0.00351  | 2.41  |
| A_44_P991616  | Ube1dc1      | 15.284 | 14.102 | 1.182 | 2.269 | 0.21294 | 0.00087  | 4.265 |
| A_43_P16655   | Ubqln2       | 8.155  | 6.973  | 1.182 | 2.268 | 1       | 0.0086   | 1.176 |
| A_44_P261209  | BQ200585     | 6.889  | 5.709  | 1.18  | 2.265 | 1       | 0.00398  | 2.088 |
| A_44_P159296  | Atp6v1h      | 9.344  | 8.171  | 1.173 | 2.255 | 1       | 0.01142  | 0.619 |
| A_44_P606035  | A_44_P606035 | 13.839 | 12.667 | 1.172 | 2.253 | 1       | 0.00511  | 1.836 |
| A_44_P286471  | Sec24a       | 10.484 | 9.314  | 1.171 | 2.251 | 1       | 0.00926  | 0.925 |
| A_44_P533877  | Gk11         | 11.847 | 10.677 | 1.17  | 2.25  | 0.58561 | 0.00175  | 3.265 |
| A_44_P627694  | TC549793     | 8.794  | 7.625  | 1.169 | 2.249 | 0.73729 | 0.00209  | 2.984 |
| A_44_P489120  | Tram1        | 13.453 | 12.286 | 1.167 | 2.245 | 1       | 0.01337  | 0.427 |
| A_44_P236876  | LOC678715    | 11.945 | 10.78  | 1.165 | 2.242 | 1       | 0.00528  | 1.765 |
| A_44_P160697  | RGD1311381   | 11.3   | 10.136 | 1.163 | 2.24  | 1       | 0.00678  | 1.375 |
| A_44_P364678  | BF550568     | 12.869 | 11.714 | 1.155 | 2.227 | 0.36148 | 0.00124  | 3.681 |



|               |              |        |        |       |       |         |          |       |
|---------------|--------------|--------|--------|-------|-------|---------|----------|-------|
| A_44_P210486  | Atp5g1       | 15.266 | 14.112 | 1.154 | 2.226 | 1       | 0.00773  | 1.312 |
| A_43_P20415   | Tcfdp2       | 10.768 | 9.616  | 1.152 | 2.222 | 1       | 0.00556  | 1.629 |
| A_42_P604121  | Tfg          | 13.573 | 12.425 | 1.149 | 2.217 | 1       | 0.00528  | 1.8   |
| A_44_P882921  | A_44_P882921 | 11.566 | 10.418 | 1.148 | 2.217 | 0.07777 | 4.00E-04 | 5.178 |
| A_43_P17384   | RGD1303074   | 13.269 | 12.121 | 1.148 | 2.215 | 1       | 0.00286  | 2.652 |
| A_44_P445484  | RGD1561956   | 13.677 | 12.533 | 1.145 | 2.211 | 1       | 0.01035  | 0.835 |
| A_44_P468746  | Tubb6        | 13.351 | 12.211 | 1.14  | 2.204 | 1       | 0.0149   | 0.254 |
| A_44_P1045354 | Slc35b1      | 14.191 | 13.051 | 1.14  | 2.203 | 0.98346 | 0.00257  | 2.703 |
| A_44_P363237  | Pcyt2        | 10.983 | 9.854  | 1.129 | 2.187 | 1       | 0.01192  | 0.568 |
| A_44_P548748  | Mbd6         | 10.69  | 9.564  | 1.126 | 2.183 | 0.60482 | 0.00178  | 3.178 |
| A_44_P757289  | AW916375     | 10.498 | 9.377  | 1.12  | 2.174 | 1       | 0.01013  | 0.794 |
| A_44_P267809  | LOC690585    | 12.496 | 11.376 | 1.12  | 2.174 | 1       | 0.00958  | 0.878 |
| A_44_P1032732 | B4galt6      | 10.045 | 8.929  | 1.117 | 2.168 | 1       | 0.00953  | 0.889 |
| A_44_P148407  | Pdia6        | 16.867 | 15.751 | 1.116 | 2.167 | 1       | 0.01332  | 0.514 |
| A_42_P774468  | MGC94339     | 12.706 | 11.591 | 1.115 | 2.166 | 1       | 0.01321  | 0.498 |
| A_44_P316381  | Sorcs2       | 6.596  | 5.484  | 1.113 | 2.162 | 1       | 0.01259  | 0.492 |
| A_44_P314270  | RGD1562590   | 10.736 | 9.628  | 1.108 | 2.155 | 1       | 0.00274  | 2.614 |
| A_42_P622837  | RGD1306819   | 12.117 | 11.011 | 1.105 | 2.151 | 0.63846 | 0.00185  | 3.151 |
| A_44_P1057763 | Prdx6        | 13.76  | 12.657 | 1.102 | 2.147 | 0.09667 | 0.00047  | 4.967 |
| A_44_P462018  | A_44_P462018 | 12.471 | 11.369 | 1.102 | 2.146 | 0.08551 | 0.00043  | 5.086 |
| A_42_P683328  | Ratsg2       | 13.858 | 12.757 | 1.101 | 2.146 | 0.80134 | 0.0022   | 2.903 |
| A_42_P737278  | RGD1311381   | 15.025 | 13.924 | 1.101 | 2.145 | 1       | 0.01389  | 0.414 |
| A_44_P1007708 | Ebag9        | 9.662  | 8.566  | 1.096 | 2.137 | 1       | 0.00616  | 1.49  |
| A_44_P361857  | Cpeb4        | 11.934 | 10.841 | 1.093 | 2.133 | 1       | 0.00976  | 0.849 |
| A_44_P231719  | Tmem9b       | 12.016 | 10.923 | 1.092 | 2.132 | 1       | 0.01036  | 0.753 |
| A_44_P472271  | Rgl1         | 11.037 | 9.946  | 1.091 | 2.13  | 1       | 0.00492  | 1.805 |
| A_44_P336753  | AC096165     | 8.435  | 7.347  | 1.088 | 2.125 | 1       | 0.00905  | 0.963 |
| A_44_P492723  | Arhgap8      | 11.795 | 10.709 | 1.086 | 2.123 | 1       | 0.0105   | 0.733 |
| A_44_P996521  | Cxxc5        | 14.262 | 13.177 | 1.086 | 2.123 | 1       | 0.00546  | 1.661 |
| A_44_P326727  | Snd1         | 13.182 | 12.098 | 1.083 | 2.119 | 1       | 0.00469  | 1.9   |
| A_44_P157159  | RGD1311914   | 12.382 | 11.3   | 1.081 | 2.116 | 1       | 0.00607  | 1.558 |
| A_44_P411919  | Psm1         | 13.349 | 12.273 | 1.076 | 2.108 | 0.07899 | 4.00E-04 | 5.196 |
| A_44_P171203  | Nubpl        | 15.048 | 13.974 | 1.074 | 2.105 | 1       | 0.01215  | 0.537 |
| A_44_P203596  | RGD1560935   | 7.321  | 6.247  | 1.074 | 2.105 | 1       | 0.00623  | 1.521 |

|                   |              |        |        |       |       |             |             |       |
|-------------------|--------------|--------|--------|-------|-------|-------------|-------------|-------|
| A_44_P3519<br>43  | Nfx1         | 9.689  | 8.618  | 1.071 | 2.1   | 1           | 0.0073<br>5 | 1.294 |
| A_44_P4635<br>57  | Rpn1         | 14.714 | 13.646 | 1.068 | 2.097 | 1           | 0.0145<br>1 | 0.395 |
| A_44_P1006<br>18  | XM_227387    | 10.363 | 9.296  | 1.067 | 2.095 | 1           | 0.0164<br>6 | 0.142 |
| A_44_P2059<br>13  | Gorasp1      | 13.999 | 12.932 | 1.067 | 2.094 | 0.1339<br>2 | 0.0006<br>1 | 4.649 |
| A_44_P3299<br>09  | AW143475     | 13.241 | 12.176 | 1.065 | 2.092 | 1           | 0.0171<br>2 | 0.086 |
| A_44_P9960<br>06  | Slc35b4      | 11.685 | 10.621 | 1.064 | 2.09  | 0.1334<br>9 | 0.0006<br>1 | 4.653 |
| A_44_P3116<br>93  | A_44_P311693 | 11.73  | 10.671 | 1.059 | 2.084 | 1           | 0.0041<br>8 | 2.022 |
| A_44_P2029<br>88  | Odc1         | 13.551 | 12.495 | 1.056 | 2.079 | 1           | 0.0044<br>3 | 1.945 |
| A_44_P4267<br>64  | A_44_P426764 | 10.128 | 9.072  | 1.056 | 2.079 | 1           | 0.0097<br>6 | 0.945 |
| A_44_P3481<br>11  | Mtmr4        | 12.073 | 11.02  | 1.053 | 2.075 | 1           | 0.0085<br>8 | 1.039 |
| A_44_P4451<br>95  | Bat1a        | 12.597 | 11.545 | 1.052 | 2.073 | 1           | 0.0148<br>1 | 0.419 |
| A_44_P8517<br>20  | CR754090     | 8.716  | 7.667  | 1.048 | 2.068 | 1           | 0.0167<br>2 | 0.095 |
| A_44_P2718<br>12  | RGD1563859   | 7.649  | 6.609  | 1.04  | 2.056 | 1           | 0.0129<br>7 | 0.447 |
| A_42_P6191<br>14  | RGD1311098   | 13.666 | 12.627 | 1.039 | 2.055 | 1           | 0.0160<br>1 | 0.211 |
| A_44_P2862<br>15  | RT1-Ke4      | 14.787 | 13.748 | 1.039 | 2.054 | 1           | 0.0061      | 1.501 |
| A_43_P1223<br>6   | Oat          | 13.798 | 12.761 | 1.037 | 2.052 | 1           | 0.0039<br>3 | 2.21  |
| A_42_P6249<br>45  | Begain       | 10.32  | 9.283  | 1.037 | 2.052 | 1           | 0.0086      | 1.033 |
| A_44_P7140<br>54  | LOC366367    | 14.334 | 13.298 | 1.036 | 2.05  | 0.0376<br>9 | 0.0002<br>2 | 5.882 |
| A_42_P6019<br>20  | Cpt2         | 12.488 | 11.455 | 1.033 | 2.046 | 1           | 0.0102<br>5 | 0.775 |
| A_44_P2556<br>08  | Apba2bp      | 9.113  | 8.083  | 1.03  | 2.042 | 1           | 0.0064<br>2 | 1.418 |
| A_44_P2296<br>61  | LOC362526    | 13.033 | 12.003 | 1.029 | 2.041 | 1           | 0.0069<br>2 | 1.326 |
| A_42_P5989<br>65  | Wdr23        | 13.767 | 12.738 | 1.029 | 2.041 | 1           | 0.0039      | 2.117 |
| A_44_P1222<br>06  | Timm8b       | 12.738 | 11.711 | 1.027 | 2.037 | 1           | 0.0119<br>2 | 0.567 |
| A_43_P1653<br>7   | LOC288165    | 14.573 | 13.547 | 1.027 | 2.037 | 1           | 0.0156<br>7 | 0.243 |
| A_44_P2900<br>16  | BG666843     | 13.359 | 12.334 | 1.025 | 2.035 | 0.0620<br>9 | 0.0003<br>3 | 5.397 |
| A_42_P6304<br>63  | Abcb9        | 8.243  | 7.218  | 1.025 | 2.035 | 1           | 0.0101<br>8 | 0.841 |
| A_44_P4373<br>58  | BM391896     | 7.6    | 6.577  | 1.023 | 2.032 | 1           | 0.0152<br>9 | 0.322 |
| A_44_P4662<br>55  | LOC690517    | 11.869 | 10.846 | 1.023 | 2.032 | 1           | 0.0042      | 2.008 |
| A_44_P1494<br>41  | LOC314140    | 11.772 | 10.751 | 1.021 | 2.03  | 0.9894<br>5 | 0.0025<br>7 | 2.697 |
| A_44_P2180<br>23  | XM_215586    | 9.089  | 8.069  | 1.02  | 2.027 | 1           | 0.0092<br>5 | 0.928 |
| A_42_P5113<br>75  | Abhd14a      | 13.505 | 12.485 | 1.019 | 2.027 | 1           | 0.0113<br>4 | 0.687 |
| A_42_P5619<br>30  | BC104705     | 13.116 | 12.097 | 1.019 | 2.026 | 0.4425<br>3 | 0.0014<br>3 | 3.483 |
| A_44_P5530<br>01  | Sfxn2        | 12.135 | 11.12  | 1.015 | 2.021 | 1           | 0.0144<br>4 | 0.299 |
| A_44_P1014<br>955 | Psph         | 11.253 | 10.243 | 1.011 | 2.015 | 1           | 0.0116      | 0.602 |

|               |            |        |        |       |       |         |          |       |
|---------------|------------|--------|--------|-------|-------|---------|----------|-------|
| A_44_P607358  | TC540296   | 9.738  | 8.731  | 1.007 | 2.01  | 0.15955 | 7.00E-04 | 4.479 |
| A_44_P182386  | Sec61g     | 12.525 | 11.518 | 1.007 | 2.01  | 1       | 0.00584  | 1.559 |
| A_43_P17964   | Arcn1      | 11.062 | 10.056 | 1.006 | 2.008 | 1       | 0.01042  | 0.744 |
| A_44_P748217  | RGD1559545 | 12.407 | 11.411 | 0.997 | 1.995 | 1       | 0.01746  | 0.063 |
| A_44_P808218  | RGD1311937 | 10.682 | 9.687  | 0.996 | 1.994 | 1       | 0.01755  | 0.032 |
| A_43_P14686   | Ubp2       | 15.699 | 14.705 | 0.994 | 1.992 | 1       | 0.011    | 0.728 |
| A_44_P1033294 | RGD1563144 | 13.225 | 12.231 | 0.994 | 1.992 | 0.25763 | 0.001    | 4.012 |
| A_44_P835769  | CX570717   | 12.095 | 11.103 | 0.993 | 1.99  | 1       | 0.00287  | 2.557 |
| A_44_P130559  | Psmb1      | 14.563 | 13.575 | 0.987 | 1.982 | 0.66386 | 0.00191  | 3.087 |
| A_44_P138167  | Uap1       | 11.324 | 10.339 | 0.985 | 1.979 | 1       | 0.00956  | 0.96  |
| A_44_P242969  | Gpam       | 10.725 | 9.743  | 0.982 | 1.975 | 1       | 0.00553  | 1.643 |
| A_44_P128964  | RGD1560175 | 7.613  | 6.635  | 0.978 | 1.97  | 1       | 0.01407  | 0.342 |
| A_44_P515107  | Stch       | 13.113 | 12.135 | 0.978 | 1.97  | 1       | 0.00339  | 2.317 |
| A_44_P536670  | XM_344489  | 6.1    | 5.124  | 0.976 | 1.967 | 1       | 0.00819  | 1.094 |
| A_44_P139075  | Txn1       | 13.598 | 12.624 | 0.975 | 1.965 | 1       | 0.00715  | 1.285 |
| A_44_P477979  | XM_341769  | 6.596  | 5.623  | 0.974 | 1.964 | 1       | 0.00961  | 0.872 |
| A_44_P714729  | TC551845   | 12.959 | 11.986 | 0.972 | 1.962 | 1       | 0.00849  | 1.052 |
| A_44_P1042940 | TC537424   | 11.722 | 10.754 | 0.969 | 1.957 | 1       | 0.00469  | 1.873 |
| A_44_P1014263 | RGD1311457 | 13.664 | 12.698 | 0.966 | 1.953 | 1       | 0.00359  | 2.24  |
| A_42_P666771  | Ptprg      | 9.065  | 8.1    | 0.965 | 1.952 | 1       | 0.00602  | 1.574 |
| A_43_P22542   | Nsdhl      | 10.673 | 9.71   | 0.963 | 1.95  | 1       | 0.01311  | 0.431 |
| A_44_P115769  | Al171654   | 7.961  | 6.999  | 0.962 | 1.949 | 1       | 0.008    | 1.12  |
| A_44_P378315  | Srp54      | 12.775 | 11.812 | 0.962 | 1.948 | 1       | 0.00378  | 2.177 |
| A_44_P942198  | BC086438   | 8.928  | 7.966  | 0.962 | 1.948 | 1       | 0.00676  | 1.407 |
| A_44_P963558  | TC544207   | 7.461  | 6.501  | 0.961 | 1.946 | 1       | 0.01169  | 0.591 |
| A_44_P376905  | Spcc2      | 13.805 | 12.845 | 0.96  | 1.946 | 1       | 0.00634  | 1.445 |
| A_44_P408165  | LOC303332  | 11.122 | 10.162 | 0.96  | 1.945 | 1       | 0.00686  | 1.414 |
| A_44_P366192  | Sec61g     | 11.57  | 10.612 | 0.958 | 1.943 | 1       | 0.01451  | 0.291 |
| A_44_P277068  | RGD1562399 | 14.937 | 13.979 | 0.958 | 1.942 | 1       | 0.0096   | 0.924 |
| A_44_P1015733 | RGD1309400 | 15.199 | 14.243 | 0.957 | 1.941 | 1       | 0.02118  | 0.007 |
| A_44_P194474  | LOC499573  | 6.369  | 5.412  | 0.957 | 1.941 | 1       | 0.00301  | 2.47  |
| A_44_P308282  | LOC684322  | 6.646  | 5.69   | 0.956 | 1.94  | 1       | 0.00519  | 1.736 |
| A_44_P105434  | Sec63      | 12.919 | 11.966 | 0.953 | 1.936 | 1       | 0.01161  | 0.601 |
| A_44_P434023  | Lsm16      | 10.622 | 9.673  | 0.949 | 1.931 | 1       | 0.0086   | 1.137 |

|               |              |        |        |       |       |         |         |       |
|---------------|--------------|--------|--------|-------|-------|---------|---------|-------|
| A_44_P375198  | CB762850     | 6.553  | 5.605  | 0.948 | 1.929 | 1       | 0.00658 | 1.387 |
| A_44_P1030801 | Gcs1         | 15.389 | 14.444 | 0.945 | 1.925 | 1       | 0.00972 | 0.857 |
| A_44_P1026969 | RGD1310870   | 11.472 | 10.528 | 0.944 | 1.923 | 1       | 0.00501 | 1.784 |
| A_44_P490591  | RGD1565847   | 9.899  | 8.957  | 0.943 | 1.922 | 1       | 0.00634 | 1.468 |
| A_43_P10191   | Rnf7         | 12.306 | 11.364 | 0.942 | 1.922 | 1       | 0.01723 | 0.058 |
| A_44_P238392  | Mrpl49       | 10.819 | 9.879  | 0.94  | 1.919 | 0.60073 | 0.00178 | 3.184 |
| A_44_P217774  | Lysmd3       | 11.808 | 10.87  | 0.939 | 1.917 | 1       | 0.0042  | 2.011 |
| A_44_P883997  | TC518079     | 10.143 | 9.212  | 0.931 | 1.907 | 1       | 0.01431 | 0.318 |
| A_42_P832028  | Sec1311      | 14.192 | 13.264 | 0.929 | 1.904 | 0.90164 | 0.00241 | 2.787 |
| A_44_P147677  | LOC691956    | 12.293 | 11.364 | 0.929 | 1.904 | 1       | 0.00642 | 1.415 |
| A_44_P1037609 | Mat2a        | 16.847 | 15.927 | 0.92  | 1.893 | 1       | 0.01046 | 0.844 |
| A_44_P449638  | Psm2         | 13.696 | 12.777 | 0.919 | 1.891 | 1       | 0.01134 | 0.631 |
| A_44_P307347  | BE108780     | 7.232  | 6.315  | 0.917 | 1.888 | 1       | 0.0153  | 0.214 |
| A_43_P11343   | AW142634     | 12.795 | 11.881 | 0.914 | 1.885 | 1       | 0.0149  | 0.329 |
| A_44_P322433  | AW142643     | 7.736  | 6.822  | 0.914 | 1.884 | 1       | 0.01835 | 0.126 |
| A_42_P769290  | AW532904     | 14.363 | 13.449 | 0.913 | 1.883 | 1       | 0.01752 | 0.037 |
| A_44_P194863  | Spag7        | 11.527 | 10.615 | 0.912 | 1.882 | 1       | 0.01363 | 0.381 |
| A_44_P792192  | TC557253     | 11.46  | 10.551 | 0.909 | 1.878 | 1       | 0.01321 | 0.443 |
| A_42_P495428  | RGD1307736   | 11.677 | 10.769 | 0.908 | 1.877 | 1       | 0.00375 | 2.187 |
| A_44_P295654  | AA955393     | 7.631  | 6.726  | 0.905 | 1.873 | 0.79656 | 0.0022  | 2.909 |
| A_44_P343303  | Ppt2         | 14.402 | 13.499 | 0.904 | 1.871 | 1       | 0.01792 | 0.11  |
| A_44_P1052324 | Lamp3        | 6.153  | 5.249  | 0.903 | 1.871 | 1       | 0.01035 | 0.759 |
| A_44_P536806  | Psm7         | 11.498 | 10.598 | 0.901 | 1.867 | 1       | 0.00473 | 1.859 |
| A_44_P300038  | LOC681300    | 12.886 | 11.992 | 0.895 | 1.859 | 1       | 0.01139 | 0.623 |
| A_44_P139270  | Vcp          | 8      | 7.11   | 0.89  | 1.853 | 1       | 0.01036 | 0.754 |
| A_44_P190023  | A_44_P190023 | 6.391  | 5.503  | 0.888 | 1.851 | 1       | 0.00905 | 1.014 |
| A_44_P461666  | RGD1562774   | 12.976 | 12.092 | 0.884 | 1.845 | 1       | 0.01022 | 0.781 |
| A_44_P251908  | Xpnpep1      | 10.649 | 9.765  | 0.884 | 1.845 | 1       | 0.01241 | 0.511 |
| A_44_P995058  | Cope         | 15.518 | 14.64  | 0.878 | 1.838 | 1       | 0.01029 | 0.768 |
| A_44_P120337  | Al012686     | 6.775  | 5.899  | 0.876 | 1.835 | 1       | 0.00298 | 2.497 |
| A_43_P16965   | RGD1310877   | 13.595 | 12.723 | 0.872 | 1.83  | 1       | 0.01291 | 0.533 |
| A_44_P459679  | A_44_P459679 | 12.359 | 11.491 | 0.869 | 1.826 | 1       | 0.00999 | 0.818 |
| A_44_P1046554 | Ubqln1       | 13.851 | 12.985 | 0.866 | 1.822 | 1       | 0.01442 | 0.303 |
| A_44_P998555  | Hcfc2        | 12.114 | 11.251 | 0.863 | 1.819 | 1       | 0.00893 | 0.982 |

|                   |              |        |        |       |       |   |             |       |
|-------------------|--------------|--------|--------|-------|-------|---|-------------|-------|
| A_44_P4734<br>37  | RGD1564425   | 13.456 | 12.599 | 0.856 | 1.81  | 1 | 0.0177<br>9 | 0.093 |
| A_44_P7909<br>24  | A_44_P790924 | 7.738  | 6.883  | 0.856 | 1.81  | 1 | 0.0077<br>3 | 1.169 |
| A_44_P2034<br>93  | Tceb1        | 14.308 | 13.455 | 0.853 | 1.807 | 1 | 0.0052<br>2 | 1.727 |
| A_44_P1030<br>168 | Ppfia2       | 6.615  | 5.762  | 0.853 | 1.806 | 1 | 0.0085<br>8 | 1.039 |
| A_44_P1593<br>26  | XM_343667    | 13.016 | 12.176 | 0.841 | 1.791 | 1 | 0.0160<br>1 | 0.164 |
| A_44_P1044<br>736 | Wbp4         | 12.608 | 11.769 | 0.839 | 1.788 | 1 | 0.0077<br>3 | 1.189 |
| A_44_P3647<br>86  | AA957334     | 7.252  | 6.416  | 0.836 | 1.786 | 1 | 0.0168<br>5 | 0.084 |
| A_44_P1018<br>289 | BF551187     | 11.821 | 10.992 | 0.829 | 1.776 | 1 | 0.0055<br>3 | 1.641 |
| A_44_P5155<br>38  | A_44_P515538 | 9.907  | 9.078  | 0.829 | 1.776 | 1 | 0.0097<br>6 | 0.925 |
| A_43_P1273<br>7   | Hagh         | 13.675 | 12.848 | 0.827 | 1.774 | 1 | 0.0076<br>2 | 1.191 |
| A_44_P4010<br>74  | Wdsof1       | 13.245 | 12.42  | 0.825 | 1.772 | 1 | 0.0097<br>6 | 0.898 |
| A_44_P2768<br>66  | Golt1b       | 9.225  | 8.401  | 0.823 | 1.769 | 1 | 0.0102<br>1 | 0.784 |
| A_44_P1072<br>85  | Psemb6       | 14.373 | 13.557 | 0.817 | 1.761 | 1 | 0.0076<br>2 | 1.193 |
| A_44_P1433<br>49  | Arfip1       | 8.939  | 8.13   | 0.809 | 1.751 | 1 | 0.013       | 0.464 |
| A_44_P2641<br>95  | AW915009     | 11.149 | 10.345 | 0.804 | 1.746 | 1 | 0.0032<br>1 | 2.413 |
| A_43_P1115<br>6   | XM_216396    | 11.146 | 10.343 | 0.803 | 1.745 | 1 | 0.0099<br>7 | 0.844 |
| A_44_P8068<br>54  | A_44_P806854 | 13.645 | 12.846 | 0.799 | 1.74  | 1 | 0.0095<br>2 | 0.893 |
| A_44_P5506<br>26  | Fbxo28       | 10.92  | 10.123 | 0.798 | 1.738 | 1 | 0.0128<br>5 | 0.463 |
| A_44_P4878<br>41  | Srprb        | 12.691 | 11.893 | 0.797 | 1.738 | 1 | 0.0053<br>5 | 1.72  |
| A_44_P1456<br>34  | AA926087     | 7.27   | 6.476  | 0.795 | 1.735 | 1 | 0.0091<br>2 | 0.948 |
| A_42_P5921<br>57  | Pbx2         | 10.924 | 10.131 | 0.792 | 1.732 | 1 | 0.0090<br>3 | 0.968 |
| A_44_P1420<br>16  | Psen1        | 12.714 | 11.935 | 0.779 | 1.716 | 1 | 0.0167      | 0.099 |
| A_42_P6218<br>82  | Copa         | 12.916 | 12.139 | 0.777 | 1.714 | 1 | 0.0130<br>5 | 0.437 |
| A_43_P1370<br>2   | Clp1         | 11.644 | 10.87  | 0.774 | 1.71  | 1 | 0.0129<br>3 | 0.451 |
| A_44_P1664<br>82  | Mrpl41       | 14.979 | 14.209 | 0.77  | 1.706 | 1 | 0.0172<br>9 | 0.097 |
| A_42_P6035<br>85  | Atg12        | 10.816 | 10.05  | 0.766 | 1.7   | 1 | 0.0133<br>9 | 0.402 |
| A_44_P5591<br>49  | CB568740     | 14.949 | 14.185 | 0.764 | 1.699 | 1 | 0.0072      | 1.269 |
| A_44_P1003<br>517 | Psm6         | 11.584 | 10.821 | 0.764 | 1.698 | 1 | 0.0123<br>4 | 0.519 |
| A_42_P7315<br>41  | Psemb5       | 14.931 | 14.168 | 0.762 | 1.696 | 1 | 0.0163<br>5 | 0.265 |
| A_44_P3162<br>73  | A_44_P316273 | 13.485 | 12.723 | 0.762 | 1.696 | 1 | 0.0140<br>7 | 0.341 |
| A_44_P1053<br>063 | Phpt1        | 14.554 | 13.792 | 0.762 | 1.695 | 1 | 0.0055<br>9 | 1.642 |
| A_44_P8669<br>82  | AA899481     | 10.97  | 10.211 | 0.759 | 1.692 | 1 | 0.0086      | 1.031 |
| A_44_P3327<br>34  | Psm3l        | 13.438 | 12.684 | 0.754 | 1.687 | 1 | 0.0091<br>3 | 0.968 |
| A_44_P2483<br>22  | XM_214522    | 14.96  | 14.21  | 0.75  | 1.682 | 1 | 0.0096<br>3 | 0.891 |

|                   |            |        |        |        |       |             |             |       |
|-------------------|------------|--------|--------|--------|-------|-------------|-------------|-------|
| A_44_P9597<br>51  | LOC366877  | 12.658 | 11.918 | 0.74   | 1.67  | 1           | 0.0140<br>8 | 0.34  |
| A_44_P7260<br>36  | BI291916   | 12.741 | 12.025 | 0.716  | 1.643 | 1           | 0.0064<br>2 | 1.423 |
| A_43_P1296<br>4   | Plaa       | 12.479 | 11.778 | 0.701  | 1.626 | 1           | 0.0109<br>8 | 0.679 |
| A_44_P5028<br>42  | Psm�11     | 14.155 | 13.459 | 0.696  | 1.62  | 1           | 0.0129<br>3 | 0.452 |
| A_44_P2526<br>98  | LOC365909  | 9.764  | 9.075  | 0.689  | 1.612 | 1           | 0.0092<br>6 | 0.923 |
| A_44_P4902<br>06  | Eif1b      | 11.312 | 10.635 | 0.677  | 1.599 | 1           | 0.0121<br>5 | 0.542 |
| A_44_P2629<br>34  | Dnajc8     | 10.298 | 9.629  | 0.669  | 1.59  | 1           | 0.0168<br>9 | 0.08  |
| A_43_P1716<br>1   | Mkrn2      | 12.17  | 12.793 | -0.623 | 0.649 | 1           | 0.0178<br>4 | 0.012 |
| A_44_P4964<br>83  | MGC108785  | 11.27  | 11.914 | -0.644 | 0.64  | 1           | 0.0177<br>9 | 0.016 |
| A_44_P2107<br>91  | Ash2l      | 10.132 | 10.792 | -0.66  | 0.633 | 1           | 0.0089<br>3 | 0.982 |
| A_44_P1028<br>878 | Polb       | 10.978 | 11.701 | -0.723 | 0.606 | 1           | 0.0100<br>6 | 0.886 |
| A_44_P4218<br>48  | Rpp14      | 5.435  | 6.159  | -0.725 | 0.605 | 1           | 0.0163<br>4 | 0.135 |
| A_42_P7941<br>49  | AA848230   | 12.295 | 13.025 | -0.731 | 0.603 | 1           | 0.0179<br>3 | 0.004 |
| A_44_P6869<br>19  | TC557051   | 9.33   | 10.064 | -0.734 | 0.601 | 1           | 0.0163<br>6 | 0.153 |
| A_44_P4199<br>66  | RGD1306926 | 8.043  | 8.785  | -0.742 | 0.598 | 1           | 0.0152<br>8 | 0.24  |
| A_44_P7631<br>62  | TC556147   | 10.184 | 10.928 | -0.744 | 0.597 | 1           | 0.0101<br>3 | 0.796 |
| A_42_P5219<br>40  | XM_218198  | 10.027 | 10.792 | -0.766 | 0.588 | 1           | 0.0144      | 0.307 |
| A_43_P1718<br>0   | mrpl9      | 12.39  | 13.157 | -0.767 | 0.588 | 1           | 0.0139<br>4 | 0.353 |
| A_44_P9013<br>68  | TC528868   | 7.446  | 8.213  | -0.767 | 0.588 | 1           | 0.0125<br>4 | 0.498 |
| A_44_P1058<br>158 | LOC246120  | 12.115 | 12.896 | -0.781 | 0.582 | 1           | 0.0107<br>5 | 0.702 |
| A_44_P1003<br>715 | RGD1566133 | 11.398 | 12.179 | -0.781 | 0.582 | 1           | 0.011       | 0.673 |
| A_44_P2746<br>05  | RGD1562165 | 10.59  | 11.375 | -0.785 | 0.58  | 1           | 0.0167      | 0.101 |
| A_42_P5104<br>32  | RGD1311605 | 12.746 | 13.532 | -0.787 | 0.58  | 1           | 0.0079<br>8 | 1.148 |
| A_43_P2312<br>6   | Tcfcp2l2   | 7.392  | 8.183  | -0.791 | 0.578 | 1           | 0.0091<br>6 | 0.992 |
| A_42_P7305<br>05  | Rce1       | 10.633 | 11.428 | -0.795 | 0.577 | 1           | 0.0076<br>2 | 1.19  |
| A_44_P9941<br>16  | Ttbk1      | 8.362  | 9.158  | -0.796 | 0.576 | 1           | 0.0125<br>4 | 0.522 |
| A_42_P4606<br>09  | Gabarapl2  | 14.226 | 15.024 | -0.797 | 0.575 | 1           | 0.0167      | 0.102 |
| A_44_P2635<br>51  | AA848809   | 5.894  | 6.695  | -0.802 | 0.574 | 1           | 0.0149<br>8 | 0.263 |
| A_44_P5498<br>67  | AW144312   | 6.332  | 7.134  | -0.802 | 0.574 | 1           | 0.0060<br>7 | 1.509 |
| A_44_P1005<br>450 | Ktn1       | 9.459  | 10.271 | -0.812 | 0.57  | 1           | 0.0166<br>4 | 0.108 |
| A_44_P6173<br>81  | RGD1565135 | 12.173 | 12.996 | -0.823 | 0.565 | 0.4577<br>9 | 0.0014<br>6 | 3.45  |
| A_44_P1055<br>082 | Dyrk2      | 10.797 | 11.637 | -0.84  | 0.559 | 1           | 0.0163<br>4 | 0.136 |
| A_43_P1173<br>3   | Ppard      | 7.007  | 7.848  | -0.84  | 0.558 | 1           | 0.0047<br>1 | 1.867 |
| A_44_P7145<br>65  | LOC690367  | 11.907 | 12.766 | -0.859 | 0.552 | 0.5126      | 0.0015<br>8 | 3.366 |

|               |              |        |        |        |       |         |         |       |
|---------------|--------------|--------|--------|--------|-------|---------|---------|-------|
| A_43_P13946   | BM390804     | 13.81  | 14.674 | -0.864 | 0.549 | 1       | 0.01174 | 0.586 |
| A_44_P516166  | A_44_P516166 | 6.723  | 7.592  | -0.869 | 0.547 | 1       | 0.00716 | 1.332 |
| A_44_P321488  | XM_216537    | 11.706 | 12.582 | -0.876 | 0.545 | 1       | 0.01833 | 0.01  |
| A_44_P548095  | AY168780     | 7.485  | 8.365  | -0.879 | 0.544 | 1       | 0.0167  | 0.104 |
| A_44_P369389  | BF556192     | 14.125 | 15.015 | -0.89  | 0.54  | 1       | 0.01755 | 0.033 |
| A_43_P22936   | Akap3        | 7.184  | 8.076  | -0.892 | 0.539 | 1       | 0.0035  | 2.279 |
| A_44_P319221  | Dyrk2        | 8.644  | 9.539  | -0.895 | 0.538 | 1       | 0.01482 | 0.266 |
| A_44_P574311  | AW921380     | 13.945 | 14.84  | -0.895 | 0.538 | 1       | 0.0091  | 1.006 |
| A_44_P588098  | AI555277     | 8.1    | 9.005  | -0.905 | 0.534 | 1       | 0.01273 | 0.477 |
| A_42_P496649  | RGD1306839   | 11.332 | 12.24  | -0.908 | 0.533 | 0.9221  | 0.00244 | 2.766 |
| A_44_P256534  | AW918699     | 10.06  | 10.97  | -0.91  | 0.532 | 1       | 0.01042 | 0.746 |
| A_44_P411808  | Dyrk2        | 11.184 | 12.103 | -0.92  | 0.529 | 1       | 0.01104 | 0.666 |
| A_44_P380300  | Nfkbil2      | 6.778  | 7.7    | -0.921 | 0.528 | 1       | 0.01601 | 0.162 |
| A_44_P731117  | RGD1309804   | 7.891  | 8.814  | -0.922 | 0.528 | 1       | 0.00763 | 1.187 |
| A_44_P332780  | Ptpnj        | 6.681  | 7.607  | -0.926 | 0.526 | 1       | 0.00625 | 1.466 |
| A_44_P555028  | LOC291840    | 8.776  | 9.703  | -0.927 | 0.526 | 1       | 0.01633 | 0.138 |
| A_44_P999404  | Cd164        | 14.415 | 15.35  | -0.935 | 0.523 | 1       | 0.00865 | 1.152 |
| A_44_P724603  | AW920343     | 9.631  | 10.569 | -0.938 | 0.522 | 1       | 0.01392 | 0.356 |
| A_44_P158420  | Impdh2       | 13.332 | 14.27  | -0.938 | 0.522 | 1       | 0.00484 | 1.874 |
| A_44_P365901  | RGD1311739   | 9.393  | 10.339 | -0.945 | 0.519 | 1       | 0.01498 | 0.264 |
| A_44_P389156  | RGD1311994   | 8.273  | 9.222  | -0.949 | 0.518 | 1       | 0.00415 | 2.031 |
| A_44_P196591  | Sh3bp4       | 9.054  | 10.005 | -0.951 | 0.517 | 1       | 0.00607 | 1.562 |
| A_44_P462361  | Trpc2        | 5.603  | 6.557  | -0.954 | 0.516 | 1       | 0.0091  | 1.005 |
| A_44_P370774  | Irak3        | 6.279  | 7.235  | -0.956 | 0.516 | 1       | 0.01363 | 0.459 |
| A_44_P883718  | RGD1560139   | 7.719  | 8.675  | -0.956 | 0.515 | 1       | 0.00542 | 1.678 |
| A_44_P1056682 | LOC498368    | 11.919 | 12.878 | -0.959 | 0.514 | 1       | 0.01099 | 0.676 |
| A_44_P532341  | A_44_P532341 | 6.932  | 7.892  | -0.96  | 0.514 | 0.50043 | 0.00155 | 3.407 |
| A_42_P709692  | Pnrc1        | 9.956  | 10.92  | -0.963 | 0.513 | 1       | 0.0129  | 0.457 |
| A_44_P528552  | Tyki         | 6.88   | 7.847  | -0.967 | 0.512 | 1       | 0.01645 | 0.123 |
| A_44_P934022  | LOC500110    | 6.91   | 7.884  | -0.974 | 0.509 | 0.09958 | 0.00048 | 4.938 |
| A_44_P222011  | Mrlcb        | 12.021 | 12.998 | -0.977 | 0.508 | 0.45053 | 0.00145 | 3.492 |
| A_43_P12143   | Cyln2        | 13.137 | 14.134 | -0.997 | 0.501 | 1       | 0.01892 | 0.003 |
| A_44_P321212  | LOC306346    | 5.575  | 6.572  | -0.998 | 0.501 | 1       | 0.0149  | 0.253 |
| A_44_P215582  | RGD1310660   | 14.435 | 15.436 | -1.002 | 0.499 | 1       | 0.01134 | 0.631 |

|              |                 |        |        |        |       |         |         |       |
|--------------|-----------------|--------|--------|--------|-------|---------|---------|-------|
| A_44_P106167 | MGC114388       | 7.14   | 8.143  | -1.003 | 0.499 | 1       | 0.00762 | 1.191 |
| A_44_P437848 | RGD1564253      | 9.361  | 10.365 | -1.004 | 0.498 | 1       | 0.01139 | 0.679 |
| A_44_P105377 | Cenpb           | 12.308 | 13.312 | -1.005 | 0.498 | 1       | 0.0073  | 1.251 |
| A_44_P479131 | BF414888        | 7.02   | 8.028  | -1.008 | 0.497 | 1       | 0.01477 | 0.272 |
| A_44_P327515 | LOC501515       | 9.117  | 10.129 | -1.011 | 0.496 | 1       | 0.01461 | 0.306 |
| A_44_P747329 | TC552239        | 8.934  | 9.946  | -1.012 | 0.496 | 1       | 0.00839 | 1.07  |
| A_43_P10040  | AW921534        | 7.451  | 8.477  | -1.026 | 0.491 | 1       | 0.01285 | 0.464 |
| A_44_P410348 | Card12          | 8.077  | 9.103  | -1.026 | 0.491 | 1       | 0.01568 | 0.208 |
| A_43_P10616  | LOC688211       | 9.822  | 10.853 | -1.031 | 0.489 | 1       | 0.01601 | 0.162 |
| A_44_P638478 | TC541382        | 10.74  | 11.774 | -1.034 | 0.488 | 0.46981 | 0.00148 | 3.425 |
| A_42_P837568 | L1cam           | 8.041  | 9.079  | -1.039 | 0.487 | 1       | 0.01275 | 0.475 |
| A_43_P10445  | Rad23a          | 10.484 | 11.525 | -1.041 | 0.486 | 1       | 0.01646 | 0.121 |
| A_43_P22351  | RGD1307594      | 10.126 | 11.169 | -1.043 | 0.485 | 1       | 0.009   | 1.025 |
| A_44_P367486 | Lig1            | 13.297 | 14.342 | -1.045 | 0.485 | 1       | 0.00742 | 1.278 |
| A_44_P253439 | Cldn6           | 6.802  | 7.856  | -1.054 | 0.482 | 1       | 0.01165 | 0.596 |
| A_44_P500660 | MGC95152        | 7.829  | 8.887  | -1.058 | 0.48  | 1       | 0.0149  | 0.251 |
| A_43_P11260  | TC551913        | 9.022  | 10.087 | -1.065 | 0.478 | 1       | 0.00379 | 2.277 |
| A_44_P792633 | RGD1311267      | 10.076 | 11.145 | -1.069 | 0.477 | 1       | 0.00875 | 1.031 |
| A_44_P775875 | LOC691678       | 7.219  | 8.297  | -1.078 | 0.474 | 1       | 0.01215 | 0.539 |
| A_44_P622060 | DV718625        | 10.569 | 11.65  | -1.081 | 0.473 | 0.50465 | 0.00156 | 3.355 |
| A_44_P393442 | Mtap6           | 7.768  | 8.849  | -1.081 | 0.473 | 1       | 0.01796 | 0.001 |
| A_44_P515461 | Bpnt1           | 10.634 | 11.717 | -1.083 | 0.472 | 1       | 0.00672 | 1.493 |
| A_44_P133650 | Trim37          | 9.475  | 10.56  | -1.085 | 0.471 | 0.98671 | 0.00257 | 2.725 |
| A_44_P442589 | Efna1           | 10.084 | 11.169 | -1.085 | 0.471 | 1       | 0.01192 | 0.569 |
| A_44_P146821 | Hivep2          | 10.542 | 11.629 | -1.087 | 0.471 | 0.44455 | 0.00144 | 3.479 |
| A_42_P777177 | BF542992        | 12.291 | 13.379 | -1.088 | 0.471 | 1       | 0.00606 | 1.566 |
| A_42_P812406 | BF557223        | 6.354  | 7.442  | -1.088 | 0.47  | 1       | 0.00907 | 0.958 |
| A_44_P131107 | XM_573907       | 6.672  | 7.763  | -1.091 | 0.469 | 1       | 0.0072  | 1.269 |
| A_43_P17976  | Men1 RGD1306967 | 8.563  | 9.655  | -1.092 | 0.469 | 1       | 0.00293 | 2.55  |
| A_43_P11146  | Lyplal1         | 12.539 | 13.635 | -1.095 | 0.468 | 1       | 0.00265 | 2.763 |
| A_43_P17591  | RGD1309266      | 6.412  | 7.509  | -1.097 | 0.467 | 1       | 0.01075 | 0.755 |
| A_44_P945669 | LOC499933       | 6.708  | 7.812  | -1.104 | 0.465 | 1       | 0.01482 | 0.342 |
| A_44_P961911 | TC544685        | 8.421  | 9.527  | -1.105 | 0.465 | 0.06611 | 0.00035 | 5.363 |
| A_43_P12535  | Klf10           | 13.082 | 14.191 | -1.11  | 0.463 | 1       | 0.0064  | 1.48  |



|                   |            |        |        |        |       |             |             |       |
|-------------------|------------|--------|--------|--------|-------|-------------|-------------|-------|
| A_44_P7306<br>61  | CF109839   | 7.997  | 9.106  | -1.11  | 0.463 | 1           | 0.0164<br>5 | 0.124 |
| A_44_P4286<br>51  | ltgav      | 7.417  | 8.53   | -1.113 | 0.462 | 1           | 0.0032<br>1 | 2.392 |
| A_43_P1793<br>7   | RGD1306625 | 6.449  | 7.562  | -1.113 | 0.462 | 0.2454<br>2 | 0.0009<br>8 | 4.116 |
| A_44_P1056<br>599 | XM_213637  | 11.323 | 12.436 | -1.113 | 0.462 | 0.1666      | 0.0007<br>2 | 4.464 |
| A_44_P1030<br>20  | LOC499941  | 10.287 | 11.4   | -1.113 | 0.462 | 1           | 0.0072      | 1.324 |
| A_44_P3288<br>29  | Nek8       | 8.985  | 10.104 | -1.119 | 0.46  | 1           | 0.0041<br>4 | 2.037 |
| A_44_P1039<br>760 | Tcte1l     | 9.828  | 10.948 | -1.12  | 0.46  | 1           | 0.0078<br>9 | 1.191 |
| A_44_P6120<br>79  | TC568359   | 7.662  | 8.784  | -1.122 | 0.46  | 1           | 0.0062      | 1.53  |
| A_44_P2024<br>70  | AA955742   | 5.348  | 6.473  | -1.125 | 0.458 | 1           | 0.0172<br>4 | 0.056 |
| A_44_P7417<br>23  | Il13ra1    | 11.481 | 12.606 | -1.126 | 0.458 | 1           | 0.0079<br>5 | 1.157 |
| A_42_P7453<br>56  | Sox9       | 12.528 | 13.658 | -1.13  | 0.457 | 1           | 0.0113<br>9 | 0.646 |
| A_44_P4242<br>35  | LOC680717  | 7.598  | 8.746  | -1.148 | 0.451 | 1           | 0.0056<br>4 | 1.608 |
| A_44_P8338<br>22  | Mapkapk3   | 10.71  | 11.863 | -1.153 | 0.45  | 1           | 0.0028      | 2.586 |
| A_44_P6061<br>74  | LOC500348  | 11.574 | 12.731 | -1.157 | 0.448 | 1           | 0.0101<br>3 | 0.794 |
| A_44_P4198<br>22  | RGD1310994 | 10.507 | 11.669 | -1.162 | 0.447 | 1           | 0.0095<br>3 | 0.989 |
| A_44_P1334<br>53  | Mrlcb      | 14.07  | 15.232 | -1.162 | 0.447 | 1           | 0.0132<br>9 | 0.518 |
| A_44_P4099<br>77  | Wee1       | 7.679  | 8.841  | -1.163 | 0.447 | 0.7818<br>3 | 0.0021<br>8 | 3.001 |
| A_44_P5611<br>13  | TC538424   | 12.82  | 13.988 | -1.168 | 0.445 | 0.4529<br>6 | 0.0014<br>5 | 3.504 |
| A_44_P2177<br>26  | RGD1309847 | 8.588  | 9.757  | -1.17  | 0.444 | 1           | 0.0057<br>6 | 1.583 |
| A_44_P1961<br>98  | Per3       | 7.225  | 8.395  | -1.17  | 0.444 | 1           | 0.0143<br>9 | 0.31  |
| A_44_P1031<br>479 | RGD1565591 | 14.054 | 15.226 | -1.172 | 0.444 | 0.6145<br>7 | 0.0018      | 3.207 |
| A_44_P1402<br>75  | Alpk1      | 8.91   | 10.084 | -1.174 | 0.443 | 1           | 0.0160<br>4 | 0.288 |
| A_44_P7776<br>17  | TC559196   | 7.788  | 8.965  | -1.177 | 0.442 | 0.1912<br>2 | 0.0008<br>1 | 4.302 |
| A_43_P1541<br>4   | Hcn3       | 7.26   | 8.437  | -1.177 | 0.442 | 0.7861<br>8 | 0.0021<br>9 | 2.921 |
| A_44_P1036<br>534 | Paqr4      | 12.688 | 13.87  | -1.182 | 0.441 | 1           | 0.0092<br>6 | 0.925 |
| A_44_P1045<br>105 | Pvrl2      | 13.512 | 14.698 | -1.186 | 0.439 | 1           | 0.0036      | 2.233 |
| A_44_P5086<br>53  | S100z      | 6.531  | 7.72   | -1.188 | 0.439 | 1           | 0.0072<br>5 | 1.261 |
| A_42_P4917<br>07  | BF546374   | 12.575 | 13.767 | -1.193 | 0.438 | 1           | 0.0038<br>1 | 2.164 |
| A_42_P7410<br>27  | Jun        | 14.595 | 15.788 | -1.193 | 0.437 | 0.5192<br>9 | 0.0015<br>9 | 3.327 |
| A_44_P1636<br>66  | RGD1565682 | 5.152  | 6.35   | -1.198 | 0.436 | 1           | 0.0040<br>3 | 2.076 |
| A_44_P3796<br>19  | RT1-M5     | 9.049  | 10.247 | -1.198 | 0.436 | 1           | 0.0107<br>5 | 0.701 |
| A_44_P7773<br>73  | RGD1560519 | 7.792  | 8.993  | -1.201 | 0.435 | 1           | 0.0126<br>4 | 0.509 |
| A_44_P8700<br>46  | TC558796   | 9.204  | 10.407 | -1.203 | 0.434 | 1           | 0.0035      | 2.325 |
| A_44_P2253<br>53  | RGD1311458 | 12.47  | 13.673 | -1.203 | 0.434 | 0.0872<br>6 | 0.0004<br>4 | 5.066 |

|              |                    |        |        |        |       |         |         |       |
|--------------|--------------------|--------|--------|--------|-------|---------|---------|-------|
| A_44_P429455 | Lama5              | 11.208 | 12.414 | -1.206 | 0.433 | 0.50027 | 0.00155 | 3.363 |
| A_44_P101211 | Mcl1               | 12.427 | 13.634 | -1.207 | 0.433 | 1       | 0.00295 | 2.514 |
| A_42_P489223 | RGD1560519         | 10.345 | 11.554 | -1.209 | 0.433 | 1       | 0.01025 | 0.821 |
| A_44_P159271 | RGD1311589         | 9.99   | 11.205 | -1.215 | 0.431 | 0.83342 | 0.00227 | 2.864 |
| A_44_P210178 | Carhsp1            | 13.757 | 14.972 | -1.215 | 0.431 | 1       | 0.00299 | 2.567 |
| A_44_P429453 | Lama5              | 11.901 | 13.122 | -1.221 | 0.429 | 0.25728 | 0.001   | 4.013 |
| A_42_P762829 | Cebpd              | 14.036 | 15.258 | -1.221 | 0.429 | 1       | 0.00389 | 2.173 |
| A_44_P215530 | Tnks1bp1           | 7.046  | 8.273  | -1.226 | 0.427 | 0.58444 | 0.00175 | 3.211 |
| A_44_P590505 | ENSRNOT00000033038 | 7.226  | 8.456  | -1.23  | 0.426 | 1       | 0.01035 | 0.81  |
| A_44_P254540 | AW915585           | 10.121 | 11.353 | -1.232 | 0.426 | 1       | 0.01387 | 0.363 |
| A_44_P238019 | AW143671           | 9.173  | 10.408 | -1.235 | 0.425 | 1       | 0.00453 | 1.919 |
| A_44_P140351 | RGD1311267         | 8.455  | 9.691  | -1.236 | 0.425 | 0.8095  | 0.00222 | 2.893 |
| A_44_P525482 | RGD1560449         | 6.627  | 7.868  | -1.241 | 0.423 | 1       | 0.00773 | 1.163 |
| A_44_P280965 | Mcl1               | 12.562 | 13.803 | -1.241 | 0.423 | 0.03111 | 0.00019 | 6.068 |
| A_43_P14977  | LOC498545 Tsc22d1  | 13.762 | 15.007 | -1.245 | 0.422 | 1       | 0.00293 | 2.598 |
| A_43_P15426  | Trpc3              | 6.239  | 7.49   | -1.251 | 0.42  | 1       | 0.00841 | 1.065 |
| A_44_P426128 | Olr1748            | 6.64   | 7.892  | -1.252 | 0.42  | 1       | 0.00997 | 0.822 |
| A_44_P306639 | Dap                | 11.16  | 12.413 | -1.253 | 0.42  | 0.35855 | 0.00124 | 3.689 |
| A_44_P173575 | Rassf1             | 11.467 | 12.722 | -1.255 | 0.419 | 1       | 0.00543 | 1.694 |
| A_44_P534753 | Zmynd15            | 10.452 | 11.709 | -1.257 | 0.418 | 0.81523 | 0.00223 | 2.886 |
| A_44_P900924 | TC543926           | 11.346 | 12.605 | -1.259 | 0.418 | 1       | 0.00326 | 2.368 |
| A_42_P677628 | Klf6               | 15.109 | 16.368 | -1.26  | 0.418 | 1       | 0.01645 | 0.281 |
| A_44_P133162 | Rnase11            | 5.428  | 6.688  | -1.26  | 0.418 | 1       | 0.01389 | 0.359 |
| A_44_P898831 | TC551980           | 7.314  | 8.575  | -1.261 | 0.417 | 1       | 0.00297 | 2.533 |
| A_44_P945404 | TC555723           | 10.484 | 11.749 | -1.265 | 0.416 | 0.29682 | 0.0011  | 3.9   |
| A_44_P238978 | Ris2               | 6.906  | 8.173  | -1.266 | 0.416 | 1       | 0.00389 | 2.133 |
| A_43_P15057  | TC538830           | 13.098 | 14.366 | -1.268 | 0.415 | 1       | 0.00596 | 1.787 |
| A_44_P804257 | Trim37             | 7.795  | 9.072  | -1.277 | 0.413 | 0.30358 | 0.00111 | 3.851 |
| A_44_P541426 | Srms               | 6.784  | 8.063  | -1.279 | 0.412 | 1       | 0.00321 | 2.391 |
| A_44_P557246 | ErbB3              | 7.932  | 9.211  | -1.279 | 0.412 | 1       | 0.00357 | 2.25  |
| A_44_P900333 | TC558323           | 9.694  | 10.978 | -1.284 | 0.411 | 1       | 0.00584 | 1.56  |
| A_44_P356125 | Sap2               | 9.709  | 10.995 | -1.286 | 0.41  | 1       | 0.00675 | 1.359 |
| A_42_P515405 | Ier3               | 10.866 | 12.158 | -1.292 | 0.408 | 1       | 0.00956 | 0.882 |
| A_44_P529753 | XM_344265          | 9.496  | 10.79  | -1.294 | 0.408 | 1       | 0.00389 | 2.179 |

|               |              |        |        |        |       |         |          |       |
|---------------|--------------|--------|--------|--------|-------|---------|----------|-------|
| A_44_P236886  | XM_340919    | 7.48   | 8.781  | -1.301 | 0.406 | 1       | 0.00298  | 2.501 |
| A_44_P562314  | TC524618     | 9.019  | 10.322 | -1.302 | 0.406 | 0.61115 | 0.00179  | 3.24  |
| A_44_P504120  | Crocc        | 9.116  | 10.422 | -1.306 | 0.404 | 0.02095 | 0.00015  | 6.451 |
| A_44_P983155  | LOC292209    | 9.439  | 10.747 | -1.308 | 0.404 | 1       | 0.01106  | 0.661 |
| A_44_P768244  | CB556786     | 10.391 | 11.701 | -1.31  | 0.403 | 0.10472 | 5.00E-04 | 4.889 |
| A_43_P17491   | Mmp15        | 7.567  | 8.878  | -1.311 | 0.403 | 1       | 0.01779  | 0.016 |
| A_42_P555426  | TC523746     | 8.635  | 9.947  | -1.311 | 0.403 | 0.43899 | 0.00143  | 3.518 |
| A_42_P823894  | Map3k1       | 10.903 | 12.216 | -1.314 | 0.402 | 1       | 0.0111   | 0.678 |
| A_44_P344807  | RGD1564708   | 7.35   | 8.67   | -1.32  | 0.401 | 1       | 0.00378  | 2.175 |
| A_44_P318553  | Met          | 6.15   | 7.471  | -1.32  | 0.4   | 0.86504 | 0.00233  | 2.828 |
| A_44_P264208  | Ak3          | 13.621 | 14.944 | -1.322 | 0.4   | 0.23621 | 0.00095  | 4.164 |
| A_44_P843798  | AW144049     | 6.438  | 7.762  | -1.323 | 0.4   | 1       | 0.00554  | 1.636 |
| A_44_P217471  | Il12rb2      | 6.203  | 7.528  | -1.326 | 0.399 | 1       | 0.00637  | 1.488 |
| A_44_P439475  | Klf7         | 9.834  | 11.163 | -1.329 | 0.398 | 1       | 0.00693  | 1.322 |
| A_44_P684795  | Irs2         | 9.086  | 10.417 | -1.331 | 0.397 | 1       | 0.01488  | 0.259 |
| A_44_P1045748 | Lpin2        | 7.676  | 9.008  | -1.332 | 0.397 | 0.51567 | 0.00158  | 3.36  |
| A_44_P917150  | DV728005     | 7.817  | 9.154  | -1.337 | 0.396 | 1       | 0.00433  | 1.977 |
| A_44_P116875  | LOC368158    | 7.735  | 9.079  | -1.345 | 0.394 | 0.35196 | 0.00123  | 3.707 |
| A_44_P264211  | Ak3          | 12.828 | 14.174 | -1.347 | 0.393 | 0.27826 | 0.00106  | 3.936 |
| A_44_P853102  | TC554571     | 10.997 | 12.345 | -1.348 | 0.393 | 1       | 0.00323  | 2.379 |
| A_43_P17424   | Chaf1b       | 10.296 | 11.646 | -1.35  | 0.392 | 1       | 0.01498  | 0.266 |
| A_44_P531741  | Masp1        | 6.907  | 8.257  | -1.351 | 0.392 | 1       | 0.01522  | 0.223 |
| A_43_P18160   | Tacc2        | 9.472  | 10.827 | -1.355 | 0.391 | 1       | 0.00448  | 1.932 |
| A_44_P529581  | Okl38        | 9.287  | 10.65  | -1.363 | 0.389 | 1       | 0.00366  | 2.213 |
| A_44_P790674  | LOC498289    | 6.941  | 8.307  | -1.366 | 0.388 | 1       | 0.013    | 0.442 |
| A_44_P743576  | AW917533     | 10.237 | 11.605 | -1.368 | 0.387 | 1       | 0.00338  | 2.349 |
| A_43_P16529   | Gadd45b      | 13.25  | 14.618 | -1.369 | 0.387 | 0.49621 | 0.00155  | 3.415 |
| A_43_P14382   | RGD1566118   | 13.249 | 14.623 | -1.374 | 0.386 | 0.39661 | 0.00134  | 3.617 |
| A_44_P591495  | RGD1560170   | 10.53  | 11.905 | -1.374 | 0.386 | 1       | 0.00411  | 2.099 |
| A_44_P245530  | lfngr lfngr1 | 12.271 | 13.65  | -1.379 | 0.385 | 1       | 0.0057   | 1.596 |
| A_43_P12079   | Ptges        | 9.31   | 10.69  | -1.38  | 0.384 | 1       | 0.01106  | 0.662 |
| A_44_P838436  | LOC679007    | 8.159  | 9.54   | -1.381 | 0.384 | 1       | 0.00331  | 2.35  |
| A_44_P217541  | Tmem49       | 13.341 | 14.723 | -1.382 | 0.384 | 1       | 0.01689  | 0.134 |
| A_44_P217049  | BF289650     | 12.642 | 14.028 | -1.386 | 0.383 | 0.8933  | 0.00239  | 2.843 |

|                   |            |        |        |        |       |             |              |       |
|-------------------|------------|--------|--------|--------|-------|-------------|--------------|-------|
| A_44_P8232<br>12  | TC557977   | 7.081  | 8.472  | -1.391 | 0.381 | 1           | 0.0029<br>9  | 2.487 |
| A_44_P4394<br>73  | Klf7       | 10.835 | 12.234 | -1.399 | 0.379 | 1           | 0.0152<br>8  | 0.239 |
| A_44_P6061<br>12  | Trim24     | 9.144  | 10.556 | -1.412 | 0.376 | 1           | 0.0063<br>1  | 1.452 |
| A_44_P5230<br>16  | LOC499913  | 11.177 | 12.589 | -1.412 | 0.376 | 1           | 0.0071<br>6  | 1.305 |
| A_44_P8854<br>61  | TC541875   | 8.781  | 10.196 | -1.416 | 0.375 | 0.0812<br>5 | 0.0004<br>1  | 5.136 |
| A_44_P1029<br>298 | Ppfbp2     | 8.882  | 10.298 | -1.416 | 0.375 | 1           | 0.0120<br>8  | 0.552 |
| A_44_P1013<br>851 | Bmp2       | 8.891  | 10.312 | -1.422 | 0.373 | 1           | 0.0144       | 0.307 |
| A_43_P1111<br>4   | TC543047   | 12.454 | 13.878 | -1.425 | 0.372 | 0.5788<br>5 | 0.0017<br>4  | 3.221 |
| A_43_P2325<br>1   | Pcdh20     | 6.749  | 8.177  | -1.428 | 0.372 | 0.3449<br>2 | 0.0012<br>1  | 3.727 |
| A_44_P1290<br>09  | AA957332   | 8.316  | 9.746  | -1.43  | 0.371 | 1           | 0.0040<br>6  | 2.09  |
| A_44_P5429<br>33  | Zfp36l1    | 14.018 | 15.458 | -1.44  | 0.369 | 0.3935<br>1 | 0.0013<br>3  | 3.738 |
| A_44_P3310<br>83  | RGD1306591 | 8.476  | 9.917  | -1.441 | 0.368 | 0.628       | 0.0018<br>3  | 3.214 |
| A_42_P5914<br>75  | CO393605   | 11.672 | 13.119 | -1.447 | 0.367 | 0.2049<br>9 | 0.0008<br>4  | 4.234 |
| A_44_P4099<br>75  | Wee1       | 8.905  | 10.357 | -1.452 | 0.365 | 1           | 0.0026<br>2  | 2.699 |
| A_44_P2881<br>17  | Inhbb      | 5.882  | 7.335  | -1.453 | 0.365 | 1           | 0.0102<br>5  | 0.797 |
| A_44_P1801<br>47  | Sap2       | 8.524  | 9.982  | -1.457 | 0.364 | 1           | 0.0028<br>7  | 2.579 |
| A_44_P3158<br>86  | Magi3      | 11.269 | 12.741 | -1.472 | 0.361 | 0.1646<br>2 | 0.0007<br>1  | 4.448 |
| A_44_P6382<br>90  | LOC500110  | 12.565 | 14.038 | -1.473 | 0.36  | 0.0030<br>5 | 3.00E-<br>05 | 8.306 |
| A_44_P3894<br>93  | XM_343740  | 9.69   | 11.163 | -1.473 | 0.36  | 0.2490<br>3 | 0.0009<br>9  | 4.072 |
| A_43_P1238<br>4   | Birc3      | 9.213  | 10.693 | -1.48  | 0.359 | 0.0017<br>5 | 2.00E-<br>05 | 8.839 |
| A_44_P4930<br>05  | Foxq1      | 11.673 | 13.156 | -1.483 | 0.358 | 0.0715<br>7 | 0.0003<br>7  | 5.259 |
| A_44_P4244<br>41  | tGap1      | 9.684  | 11.176 | -1.492 | 0.355 | 1           | 0.0026<br>8  | 2.644 |
| A_44_P1334<br>64  | XM_347133  | 7.664  | 9.174  | -1.51  | 0.351 | 1           | 0.0064<br>2  | 1.466 |
| A_44_P4432<br>35  | Eil3       | 8.763  | 10.275 | -1.512 | 0.351 | 1           | 0.0050<br>7  | 1.768 |
| A_44_P8436<br>93  | BG671480   | 8.774  | 10.293 | -1.52  | 0.349 | 0.7970<br>5 | 0.0022       | 2.908 |
| A_44_P5201<br>75  | Masp1      | 8.421  | 9.942  | -1.521 | 0.349 | 1           | 0.0128<br>5  | 0.465 |
| A_43_P1147<br>2   | Hmox1      | 9.636  | 11.164 | -1.528 | 0.347 | 1           | 0.0061<br>6  | 1.489 |
| A_44_P1941<br>30  | Myh14      | 7.014  | 8.542  | -1.528 | 0.347 | 1           | 0.0051<br>9  | 1.766 |
| A_44_P2600<br>36  | Plau       | 11.084 | 12.613 | -1.529 | 0.346 | 1           | 0.0055<br>3  | 1.665 |
| A_44_P3884<br>01  | BQ781391   | 5.486  | 7.017  | -1.531 | 0.346 | 0.4084<br>7 | 0.0013<br>7  | 3.632 |
| A_43_P1276<br>8   | Bhlhb2     | 9.557  | 11.09  | -1.532 | 0.346 | 1           | 0.0029<br>9  | 2.51  |
| A_44_P1358<br>57  | XM_239589  | 9.151  | 10.688 | -1.538 | 0.344 | 1           | 0.0071       | 1.345 |
| A_44_P5186<br>65  | Al234712   | 7.485  | 9.042  | -1.557 | 0.34  | 0.2114<br>2 | 0.0008<br>6  | 4.232 |
| A_44_P1003<br>623 | Al113137   | 13.154 | 14.713 | -1.559 | 0.339 | 0.0228<br>7 | 0.0001<br>6  | 6.39  |

|               |                     |        |        |        |       |         |          |       |
|---------------|---------------------|--------|--------|--------|-------|---------|----------|-------|
| A_44_P684985  | TC542557            | 5.823  | 7.383  | -1.56  | 0.339 | 0.4243  | 0.0014   | 3.595 |
| A_44_P253108  | Spbc25              | 7.446  | 9.006  | -1.56  | 0.339 | 1       | 0.01214  | 0.544 |
| A_44_P391939  | eplin               | 10.432 | 11.996 | -1.564 | 0.338 | 0.01447 | 0.00011  | 6.809 |
| A_44_P538551  | Ceacam1             | 6.935  | 8.5    | -1.565 | 0.338 | 0.32513 | 0.00116  | 3.784 |
| A_44_P487112  | Wee1                | 11.051 | 12.639 | -1.588 | 0.333 | 0.08614 | 0.00043  | 5.106 |
| A_43_P19763   | Tlr2                | 10.987 | 12.579 | -1.593 | 0.332 | 1       | 0.00576  | 1.581 |
| A_42_P462987  | LOC683383           | 11.623 | 13.22  | -1.597 | 0.331 | 0.47191 | 0.00149  | 3.42  |
| A_44_P273783  | Aldh1a3             | 8.091  | 9.702  | -1.611 | 0.327 | 1       | 0.00868  | 1.017 |
| A_44_P401858  | Ris1                | 7.782  | 9.395  | -1.612 | 0.327 | 0.13917 | 0.00062  | 4.612 |
| A_44_P1029697 | Chl1                | 8.753  | 10.369 | -1.616 | 0.326 | 1       | 0.0167   | 0.098 |
| A_42_P497429  | Myadm               | 10.144 | 11.767 | -1.623 | 0.325 | 0.02936 | 0.00019  | 6.124 |
| A_44_P137782  | Ap3b2               | 6.914  | 8.553  | -1.64  | 0.321 | 0.30144 | 0.00111  | 3.885 |
| A_43_P12125   | Junb                | 11.77  | 13.411 | -1.641 | 0.321 | 1       | 0.00937  | 0.91  |
| A_44_P353978  | XM_345064           | 9.185  | 10.827 | -1.642 | 0.32  | 0.00504 | 5.00E-05 | 7.825 |
| A_42_P54374   | Trib3               | 11.385 | 13.03  | -1.644 | 0.32  | 1       | 0.00484  | 1.826 |
| A_43_P12596   | Ghrh                | 8.997  | 10.66  | -1.663 | 0.316 | 0.87428 | 0.00235  | 2.864 |
| A_44_P918476  | TC546685            | 8.242  | 9.907  | -1.665 | 0.315 | 0.54071 | 0.00164  | 3.287 |
| A_44_P273777  | Masp1               | 5.712  | 7.382  | -1.67  | 0.314 | 0.92397 | 0.00244  | 2.764 |
| A_42_P542960  | RGD1562829          | 8.399  | 10.092 | -1.694 | 0.309 | 1       | 0.01677  | 0.169 |
| A_44_P119226  | Ankrd50             | 9.849  | 11.559 | -1.71  | 0.306 | 0.2436  | 0.00098  | 4.066 |
| A_44_P371952  | AW143923            | 10.128 | 11.842 | -1.714 | 0.305 | 0.02151 | 0.00015  | 6.452 |
| A_44_P896682  | LOC678766           | 12.15  | 13.864 | -1.714 | 0.305 | 0.0699  | 0.00036  | 5.282 |
| A_44_P840118  | TC547435            | 7.304  | 9.019  | -1.715 | 0.305 | 0.4609  | 0.00147  | 3.443 |
| A_44_P849046  | AW915417            | 8.334  | 10.049 | -1.715 | 0.305 | 0.12374 | 0.00057  | 4.763 |
| A_44_P234240  | A_44_P234240        | 6.412  | 8.133  | -1.721 | 0.303 | 1       | 0.01215  | 0.59  |
| A_44_P618385  | Efh2                | 11.622 | 13.343 | -1.722 | 0.303 | 0.29094 | 0.0011   | 3.893 |
| A_42_P704967  | Arid5a              | 9.062  | 10.79  | -1.728 | 0.302 | 0.53139 | 0.00162  | 3.348 |
| A_44_P931207  | BE101695            | 9.192  | 10.922 | -1.73  | 0.301 | 0.10834 | 0.00051  | 4.891 |
| A_44_P357870  | Cpt1a               | 10.743 | 12.476 | -1.733 | 0.301 | 1       | 0.01451  | 0.293 |
| A_44_P473074  | Slc22a5             | 8.492  | 10.225 | -1.733 | 0.301 | 0.47343 | 0.00149  | 3.417 |
| A_44_P365516  | Tgfb1i4 Tsc22d1     | 13.006 | 14.747 | -1.741 | 0.299 | 0.51931 | 0.00159  | 3.327 |
| A_43_P23209   | Dync2li1            | 11.013 | 12.756 | -1.743 | 0.299 | 0.39535 | 0.00134  | 3.593 |
| A_44_P1001820 | Slc22a5             | 8.608  | 10.354 | -1.745 | 0.298 | 0.02207 | 0.00015  | 6.401 |
| A_44_P163987  | LOC684069 LOC689801 | 6.572  | 8.32   | -1.748 | 0.298 | 1       | 0.01215  | 0.54  |

|                   |            |        |        |        |       |             |              |        |
|-------------------|------------|--------|--------|--------|-------|-------------|--------------|--------|
| A_44_P4378<br>96  | Bdnf       | 5.557  | 7.307  | -1.75  | 0.297 | 0.0205<br>4 | 0.0001<br>5  | 6.47   |
| A_44_P3438<br>59  | Csf1       | 11.087 | 12.84  | -1.753 | 0.297 | 0.0535<br>8 | 3.00E-<br>04 | 5.541  |
| A_44_P4943<br>66  | RGD1560598 | 6.998  | 8.758  | -1.76  | 0.295 | 1           | 0.0142<br>7  | 0.379  |
| A_42_P4725<br>90  | Mthfd1l    | 11.01  | 12.776 | -1.766 | 0.294 | 0.003       | 3.00E-<br>05 | 8.322  |
| A_44_P5292<br>99  | Rtkn       | 11.444 | 13.232 | -1.788 | 0.29  | 0.0698<br>6 | 0.0003<br>6  | 5.315  |
| A_44_P9980<br>08  | Bace2      | 12.74  | 14.543 | -1.802 | 0.287 | 0.0132<br>8 | 1.00E-<br>04 | 6.918  |
| A_44_P8548<br>74  | TC544770   | 6.493  | 8.299  | -1.806 | 0.286 | 0.0264<br>8 | 0.0001<br>7  | 6.224  |
| A_44_P1028<br>132 | BF564888   | 12.051 | 13.864 | -1.814 | 0.284 | 1           | 0.0103<br>5  | 0.758  |
| A_42_P5727<br>25  | Abcc3      | 9.87   | 11.688 | -1.818 | 0.284 | 0.0120<br>2 | 9.00E-<br>05 | 6.988  |
| A_42_P6776<br>23  | Klf6       | 10.333 | 12.157 | -1.824 | 0.283 | 1           | 0.0182<br>7  | 0.224  |
| A_44_P4140<br>87  | AA818205   | 11.677 | 13.514 | -1.837 | 0.28  | 0.2826<br>6 | 0.0010<br>8  | 3.921  |
| A_44_P1037<br>342 | Cyp3a13    | 6.278  | 8.119  | -1.841 | 0.279 | 1           | 0.0124<br>1  | 0.513  |
| A_44_P3760<br>43  | BF390703   | 10.408 | 12.255 | -1.847 | 0.278 | 0.4126<br>7 | 0.0013<br>8  | 3.551  |
| A_44_P1038<br>028 | Tnfrsf12a  | 12.741 | 14.589 | -1.848 | 0.278 | 1           | 0.0038<br>9  | 2.128  |
| A_42_P6896<br>31  | Ephb6      | 7.945  | 9.824  | -1.88  | 0.272 | 1           | 0.0040<br>9  | 2.054  |
| A_44_P8831<br>91  | LOC685924  | 13.448 | 15.333 | -1.885 | 0.271 | 1           | 0.0064<br>8  | 1.404  |
| A_44_P5518<br>42  | Abtb2      | 10.01  | 11.911 | -1.901 | 0.268 | 0.2650<br>5 | 0.0010<br>3  | 3.984  |
| A_44_P8288<br>70  | TC557172   | 6.686  | 8.607  | -1.921 | 0.264 | 0.2003<br>6 | 0.0008<br>3  | 4.296  |
| A_44_P8229<br>89  | RGD1562965 | 10.918 | 12.866 | -1.948 | 0.259 | 0.4353<br>6 | 0.0014<br>2  | 3.601  |
| A_44_P7044<br>83  | Slc22a5    | 10.988 | 12.937 | -1.95  | 0.259 | 0.0002<br>6 | 1.00E-<br>05 | 10.637 |
| A_44_P3207<br>37  | LOC314323  | 6.658  | 8.61   | -1.952 | 0.259 | 1           | 0.0127<br>3  | 0.532  |
| A_43_P2318<br>8   | LOC678766  | 11.003 | 12.96  | -1.957 | 0.258 | 0.0476<br>1 | 0.0002<br>7  | 5.655  |
| A_44_P4253<br>80  | Ndrp1      | 10.17  | 12.132 | -1.962 | 0.257 | 1           | 0.0031       | 2.434  |
| A_42_P6336<br>64  | Niban      | 8.194  | 10.157 | -1.963 | 0.256 | 1           | 0.0040<br>9  | 2.056  |
| A_44_P2219<br>74  | Abcc3      | 8.458  | 10.424 | -1.965 | 0.256 | 0.3676<br>4 | 0.0012<br>6  | 3.707  |
| A_44_P3981<br>42  | Btg2       | 12.761 | 14.732 | -1.972 | 0.255 | 1           | 0.0079<br>7  | 1.128  |
| A_44_P2341<br>83  | XM_215531  | 8.1    | 10.073 | -1.973 | 0.255 | 0.0888<br>8 | 0.0004<br>4  | 5.137  |
| A_44_P3347<br>36  | Edn1       | 8.678  | 10.656 | -1.978 | 0.254 | 1           | 0.0045<br>8  | 1.931  |
| A_42_P6851<br>38  | Dab1       | 6.013  | 7.991  | -1.978 | 0.254 | 0.2504<br>6 | 0.0009<br>9  | 4.143  |
| A_44_P6837<br>78  | BQ780539   | 12.614 | 14.594 | -1.979 | 0.254 | 0.0039<br>6 | 4.00E-<br>05 | 8.062  |
| A_43_P2278<br>5   | RGD1305413 | 7.039  | 9.02   | -1.981 | 0.253 | 0.9067<br>5 | 0.0024<br>1  | 2.829  |
| A_44_P9892<br>50  | CV120833   | 10.292 | 12.279 | -1.987 | 0.252 | 0.0003<br>3 | 1.00E-<br>05 | 10.437 |
| A_42_P4629<br>92  | LOC683383  | 9.361  | 11.348 | -1.987 | 0.252 | 0.2353<br>4 | 0.0009<br>5  | 4.14   |
| A_42_P6582<br>64  | Nfkb2      | 10.937 | 12.926 | -1.989 | 0.252 | 0.0002<br>8 | 1.00E-<br>05 | 10.594 |

|                   |               |        |        |        |       |              |              |        |
|-------------------|---------------|--------|--------|--------|-------|--------------|--------------|--------|
| A_44_P1447<br>41  | Blnk          | 10.071 | 12.063 | -1.992 | 0.251 | 1            | 0.0027<br>3  | 2.623  |
| A_44_P2111<br>62  | Wnt10b        | 6.668  | 8.676  | -2.008 | 0.249 | 1            | 0.0084<br>5  | 1.111  |
| A_44_P2995<br>50  | Cldn4         | 14.019 | 16.029 | -2.01  | 0.248 | 1            | 0.0047<br>4  | 1.903  |
| A_43_P1746<br>9   | BF559670      | 8.271  | 10.309 | -2.038 | 0.244 | 0.4969<br>1  | 0.0015<br>5  | 3.37   |
| A_44_P7765<br>56  | Chac1         | 8.279  | 10.345 | -2.066 | 0.239 | 1            | 0.0106       | 0.721  |
| A_44_P6471<br>96  | A_44_P647196  | 7.785  | 9.855  | -2.07  | 0.238 | 0.0921<br>1  | 0.0004<br>5  | 5.014  |
| A_44_P4939<br>90  | Olr1746       | 6.537  | 8.613  | -2.076 | 0.237 | 0.0017<br>3  | 2.00E-<br>05 | 8.869  |
| A_44_P4411<br>07  | Tfcp2l4       | 7.779  | 9.859  | -2.08  | 0.237 | 0.0500<br>6  | 0.0002<br>8  | 5.607  |
| A_44_P5768<br>22  | Inhbb         | 10.125 | 12.211 | -2.086 | 0.236 | 1            | 0.0064       | 1.431  |
| A_44_P1400<br>92  | Myh14         | 10.656 | 12.744 | -2.088 | 0.235 | 0.0458<br>6  | 0.0002<br>6  | 5.719  |
| A_44_P2190<br>26  | Bdnf          | 6.099  | 8.195  | -2.096 | 0.234 | 0.0007<br>2  | 1.00E-<br>05 | 9.682  |
| A_44_P4373<br>27  | Sesn3         | 9.505  | 11.609 | -2.104 | 0.233 | 0.2544<br>5  | 0.001        | 4.024  |
| A_44_P5383<br>34  | Impa2         | 11.657 | 13.776 | -2.119 | 0.23  | 0.0244<br>4  | 0.0001<br>6  | 6.302  |
| A_44_P5312<br>45  | S57440        | 8.315  | 10.452 | -2.137 | 0.227 | 1            | 0.0149<br>8  | 0.243  |
| A_44_P3631<br>16  | Gm1960        | 6.752  | 8.893  | -2.14  | 0.227 | 0.1715<br>4  | 0.0007<br>3  | 4.408  |
| A_44_P2459<br>79  | RGD1560542    | 9.276  | 11.417 | -2.141 | 0.227 | 0.8552<br>1  | 0.0023<br>1  | 2.885  |
| A_44_P1501<br>12  | LOC689116     | 11.324 | 13.489 | -2.165 | 0.223 | 1            | 0.0048<br>4  | 1.822  |
| A_44_P2101<br>73  | Tnfrsf12a     | 11.343 | 13.509 | -2.166 | 0.223 | 0.1589       | 7.00E-<br>04 | 4.51   |
| A_44_P5000<br>56  | Gpx2          | 7.256  | 9.456  | -2.2   | 0.218 | 1            | 0.0046<br>5  | 1.888  |
| A_42_P6950<br>42  | Csf1          | 11.259 | 13.473 | -2.214 | 0.216 | 0.0015<br>8  | 2.00E-<br>05 | 8.938  |
| A_44_P2853<br>59  | AW527958      | 5.769  | 8.014  | -2.246 | 0.211 | 1.00E-<br>05 | 0            | 13.363 |
| A_42_P5774<br>31  | LOC680611     | 11.404 | 13.757 | -2.353 | 0.196 | 0.3542       | 0.0012<br>3  | 3.701  |
| A_43_P1651<br>5   | XM_215130     | 8.394  | 10.748 | -2.354 | 0.196 | 0.3408<br>2  | 0.0012       | 3.738  |
| A_44_P3120<br>89  | LOC316326     | 9.477  | 11.845 | -2.368 | 0.194 | 0.0026<br>9  | 3.00E-<br>05 | 8.429  |
| A_42_P7036<br>02  | Mep1b         | 8.961  | 11.334 | -2.373 | 0.193 | 0.0317<br>1  | 2.00E-<br>04 | 6.05   |
| A_44_P3992<br>49  | Tgm1          | 9.383  | 11.813 | -2.43  | 0.186 | 1            | 0.0054<br>1  | 1.759  |
| A_44_P1043<br>278 | XM_213470     | 11.079 | 13.516 | -2.437 | 0.185 | 1            | 0.0041<br>8  | 2.067  |
| A_44_P1331<br>32  | RGD1311203    | 8.184  | 10.696 | -2.513 | 0.175 | 0.0008<br>2  | 1.00E-<br>05 | 9.562  |
| A_44_P9287<br>26  | LOC683745     | 8.103  | 10.621 | -2.519 | 0.175 | 0.0010<br>3  | 1.00E-<br>05 | 9.341  |
| A_44_P5628<br>94  | Rnd1          | 10.259 | 12.867 | -2.608 | 0.164 | 0.0266<br>9  | 0.0001<br>8  | 6.217  |
| A_44_P1523<br>95  | Rnd1          | 8.149  | 10.797 | -2.648 | 0.16  | 0.0102<br>6  | 8.00E-<br>05 | 7.141  |
| A_44_P9588<br>94  | LOC298795 Sfn | 9.009  | 11.702 | -2.693 | 0.155 | 0.0956<br>8  | 0.0004<br>7  | 5.011  |
| A_44_P9319<br>22  | TC528241      | 8.187  | 10.922 | -2.736 | 0.15  | 3.00E-<br>05 | 0            | 12.75  |
| A_44_P1004<br>790 | Slc30a2       | 11.403 | 14.177 | -2.774 | 0.146 | 0.2998<br>4  | 0.0011<br>1  | 4.035  |

|              |            |        |        |        |       |          |          |        |
|--------------|------------|--------|--------|--------|-------|----------|----------|--------|
| A_44_P788634 | RGD1565148 | 7.136  | 9.911  | -2.774 | 0.146 | 0.01039  | 8.00E-05 | 7.128  |
| A_43_P22312  | Gnat2      | 9.43   | 12.219 | -2.789 | 0.145 | 1        | 0.00418  | 2.015  |
| A_44_P442813 | Cxadr      | 8.994  | 11.798 | -2.804 | 0.143 | 4.00E-05 | 0        | 12.253 |
| A_44_P716145 | Cxadr      | 9.955  | 12.783 | -2.828 | 0.141 | 0.00065  | 1.00E-05 | 9.776  |
| A_44_P116597 | Cx3cl1     | 9.683  | 12.594 | -2.911 | 0.133 | 0.31761  | 0.00114  | 3.807  |
| A_44_P326147 | LOC307495  | 9.38   | 12.352 | -2.972 | 0.127 | 0        | 0        | 17.974 |
| A_42_P663722 | Slc30a2    | 12.067 | 15.174 | -3.108 | 0.116 | 0.00296  | 3.00E-05 | 8.337  |
| A_44_P340261 | RGD1305807 | 6.878  | 10.194 | -3.315 | 0.1   | 0.00016  | 0        | 10.879 |
| A_42_P473398 | Cxcl1      | 7.05   | 10.498 | -3.447 | 0.092 | 5.00E-05 | 0        | 12.145 |
| A_44_P260514 | XM_228524  | 6.588  | 10.103 | -3.516 | 0.087 | 4.00E-05 | 0        | 12.506 |
| A_44_P594701 | BP503270   | 5.854  | 9.496  | -3.642 | 0.08  | 0.00026  | 1.00E-05 | 10.643 |
| A_44_P160841 | Calcb      | 8.14   | 11.896 | -3.756 | 0.074 | 1        | 0.00543  | 1.829  |
| A_44_P809199 | TC528809   | 8.419  | 12.426 | -4.007 | 0.062 | 1.00E-04 | 0        | 11.536 |
| A_42_P602724 | Ubd        | 12.328 | 16.598 | -4.271 | 0.052 | 0.24055  | 0.00097  | 4.119  |
| A_44_P747291 | TC561134   | 7.533  | 12.01  | -4.478 | 0.045 | 0        | 0        | 15.104 |
| A_44_P499156 | RGD1565811 | 8.097  | 13.82  | -5.723 | 0.019 | 0        | 0        | 18.299 |
