# Supplementary material
Source: PubMed Central journal article supplement (PMC3601834)

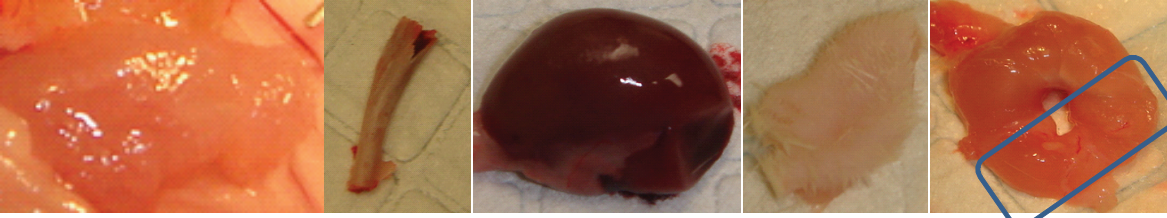

Prostate

Tibia

Kidney

Skin

LA muscle

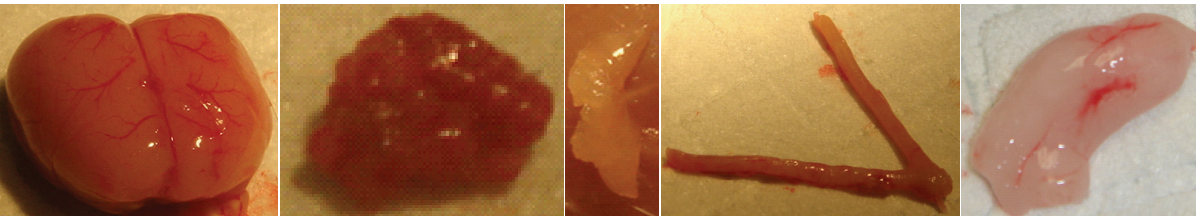

Forebrain

Ovary

Mammary

Uterus

Fat

Supplement: NIHMS447306-supplement-Supp_fig_1.pdf [file NIHMS447306-supplement-Supp_fig_1.pdf]
